# Supplementary material for: Transdifferentiation as a Mechanism of Treatment Resistance in a Mouse Model of Castration-Resistant Prostate Cancer
Source: Oxford University Press journal article supplement (doi:10.1158/2159-8290.cd-16-1174), 2017-04-14
Supplement: 21598290cd161174-sup-173292_2_unknown_upload_3969886_gg3cg3.xlsx [file 21598290cd161174-sup-173292_2_unknown_upload_3969886_gg3cg3.xlsx]

## Sheet: NP Abi vs NP Veh
Dataset S1: Differentially expresed genes after abiraterone treatment in NP and NPp53 models
Dataset S1A: Differentially expressed genes between NP abiraterone versus NP vehicle (p<0.05)
Mouse entrez	Symbol	t-statistics	p-value
231279	Guf1	12	0.000268
75636	1700022E09Rik	9.7	0.000239
70484	Slc35d2	8.22	0.00139
226359	C1ql2	7.62	0.000689
624713	Gm6525	7.4	0.00922
71151	Eri2	7.36	0.00375
98388	Chst10	7.33	0.000756
67030	Fancl	7.23	0.00182
76338	Rab2b	7.02	0.00211
20184	Uimc1	6.9	0.0025
382793	Mtx3	6.75	0.00386
100038752	Gm10825	6.72	0.00618
271944	C2cd4d	6.46	0.00783
402757	9830166K06Rik	6.4	0.00206
434864	Gm15107	6.3	0.00297
170707	Usp48	6.27	0.00355
13510	Dsg1a	6.05	0.00699
74025	Nphp3	5.97	0.00193
22033	Traf5	5.92	0.00283
70020	Ino80b	5.87	0.00681
627569	Vmn2r12	5.82	0.00212
100504549	AI463170	5.73	0.00317
668661	2410002F23Rik	5.67	0.0155
384281	Gatc	5.66	0.00256
225655	Slmo1	5.53	0.00595
68180	Hyi	5.51	0.00269
16703	Krtap8-1	5.48	0.0104
83383	Tfap4	5.46	0.00294
114141	Cldn16	5.39	0.00931
100043911	Ppp4r1l-ps	5.38	0.00579
100271928	Gm15881	5.38	0.01
100503307	Gm15408	5.37	0.00756
73225	Fam118a	5.32	0.00347
105246	Brd9	5.29	0.00385
382864	Colq	5.27	0.0112
108071	Grm5	5.22	0.00811
21954	Tnni3	5.2	0.00394
70823	Hmgxb4	5.14	0.00618
100302499	Snora3	5.1	0.00786
623312	Gm6416	5.1	0.00596
68099	Fam92a	5.09	0.0117
227835	Gtdc1	5.08	0.00386
100039684	5031434O11Rik	5.06	0.00392
16770	Lalba	5.04	0.00568
170935	Grid2ip	5.04	0.00564
27372	Prl3c1	4.97	0.00517
66708	Krtap3-2	4.97	0.00977
319586	Celf5	4.95	0.00766
320046	F730043M19Rik	4.94	0.0232
219149	Xkr6	4.91	0.00535
100502920	Gm16998	4.9	0.0045
71790	Anxa9	4.83	0.00478
13924	Ptprv	4.82	0.0142
105522	Ankrd28	4.78	0.00827
78199	4930527G23Rik	4.78	0.0163
258901	Olfr1219	4.74	0.00534
333452	Gm5132	4.74	0.00808
20518	Slc22a2	4.72	0.00975
329851	Gm12530	4.69	0.0057
67304	3110070M22Rik	4.69	0.0352
108115	Slco4a1	4.66	0.00742
70603	Mutyh	4.65	0.00561
140486	Igf2bp1	4.64	0.0172
381580	Ccdc27	4.64	0.00723
320775	B230319C09Rik	4.64	0.00616
68177	Ebpl	4.63	0.0175
58227	Fam184b	4.61	0.00671
78830	Slc25a12	4.59	0.00871
258930	Olfr808	4.59	0.00623
22590	Xpa	4.58	0.00928
70917	4921509O07Rik	4.57	0.0141
259148	Olfr329-ps	4.53	0.00722
665268	1600029O15Rik	4.5	0.0156
69159	Rhebl1	4.48	0.0348
233332	Adamts17	4.45	0.021
93843	Pnck	4.44	0.00677
109135	Plekha5	4.43	0.00888
224697	Adamts10	4.4	0.0139
381353	Gm996	4.39	0.033
13368	Dffb	4.37	0.0187
24004	Rai2	4.36	0.0225
93704	Pcdhgb7	4.33	0.0128
237716	Gpr75	4.33	0.0176
30795	Fkbp3	4.32	0.00981
171188	Vmn1r32	4.31	0.0136
69089	Oxa1l	4.3	0.00819
107227	Macrod1	4.3	0.0313
75507	Pou5f2	4.23	0.0179
79410	Klra23	4.23	0.0194
330938	Dixdc1	4.22	0.0209
14919	Gucy2e	4.21	0.0239
97827	Exd2	4.2	0.0167
382000	AY761184	4.19	0.0105
73477	1700081H04Rik	4.12	0.043
217082	Hlf	4.1	0.0105
72137	Wdsub1	4.08	0.0101
75744	Svip	4.08	0.011
269955	Rccd1	4.08	0.0128
208158	Map6d1	4.08	0.0129
233065	Alkbh6	4.08	0.0109
18749	Prkacb	4.07	0.0108
72296	Rusc1	4.06	0.0153
106014	Fam19a5	4.06	0.0132
67338	Rffl	4.05	0.0317
71755	Dhdh	4.05	0.0151
258975	Olfr1234	4.04	0.0273
76872	Ccdc116	4.03	0.0315
239618	Pdzrn4	4.02	0.0135
55993	Msh4	4.02	0.0119
404316	Olfr403	3.99	0.0195
104086	Cyp27a1	3.99	0.0491
243373	AI854703	3.99	0.0116
78651	Lsm6	3.98	0.0245
240095	H2-M5	3.98	0.0134
259051	Olfr658	3.96	0.0138
231214	Cc2d2a	3.96	0.0174
320172	E230016M11Rik	3.95	0.0495
258573	Olfr1020	3.94	0.0243
225745	Haus1	3.94	0.0139
545732	4933402N22Rik	3.94	0.0317
338359	Supv3l1	3.93	0.0119
71393	Kctd6	3.93	0.0209
225030	Kcng3	3.93	0.0113
382137	Fdxacb1	3.93	0.0442
329782	4930570G19Rik	3.93	0.0217
111175	Pecr	3.92	0.012
24059	Slco2a1	3.91	0.0113
20473	Six3	3.91	0.0206
16210	Impact	3.91	0.016
258752	Olfr583	3.89	0.0196
11695	Alx4	3.89	0.0129
381534	Ube2u	3.88	0.026
319415	Hs3st5	3.88	0.0153
258962	Olfr53	3.87	0.0149
100526512	Mir3110	3.87	0.013
100043946	Gm14635	3.87	0.015
50760	Fbxo17	3.87	0.0359
72836	Pot1b	3.86	0.0225
78394	Ddx52	3.85	0.0127
101786	A730082K24Rik	3.85	0.0248
385668	Lca5l	3.84	0.0125
67586	Ubxn11	3.83	0.0279
407821	Znrf3	3.82	0.0156
100217418	Snora44	3.81	0.0208
258937	Olfr167	3.81	0.0173
16392	Isl1	3.81	0.0266
546729	Calhm1	3.81	0.0311
214111	Slc24a1	3.8	0.0311
231070	Insig1	3.8	0.0143
75050	Kif27	3.79	0.0203
74076	4933406C10Rik	3.79	0.0139
230718	Nt5c1a	3.78	0.0238
664883	Nova1	3.78	0.016
14803	Grid1	3.77	0.0147
245867	Pcmtd2	3.76	0.019
15410	Hoxb3	3.76	0.0428
19692	Reg1	3.72	0.0148
99326	Garnl3	3.72	0.0432
432442	Akap7	3.72	0.0454
100039479	Vmn1r186	3.7	0.014
353282	Sfmbt2	3.69	0.0357
209318	Gps1	3.69	0.016
21955	Tnnt1	3.68	0.0149
245607	Gprasp2	3.66	0.0146
93717	Pcdhga9	3.65	0.0251
18163	Ctnnd2	3.65	0.0228
67015	Ccdc91	3.65	0.0264
78894	Aacs	3.64	0.0394
230757	5730409E04Rik	3.63	0.0204
258390	Olfr1276	3.62	0.0301
67968	Ooep	3.61	0.0251
14809	Grik5	3.61	0.0228
260409	Cdc42ep3	3.61	0.0224
68291	Mto1	3.6	0.0185
67663	4930549C01Rik	3.6	0.0298
12033	Bcap29	3.59	0.0176
381410	Zfp408	3.58	0.0165
56216	Stx1b	3.58	0.0199
70615	Ankrd24	3.58	0.0245
22097	Tsix	3.55	0.0388
18205	Ntf3	3.55	0.0238
100038356	Gm15612	3.55	0.0164
14317	Ftcd	3.54	0.0271
56223	Fscn3	3.54	0.026
243897	Ggn	3.53	0.0309
70011	1700030N03Rik	3.53	0.0251
72012	1600020E01Rik	3.53	0.0313
229801	Tram1l1	3.52	0.019
258150	Olfr792	3.52	0.0177
12789	Cnga2	3.52	0.0389
75203	4930539N22Rik	3.52	0.0276
56292	Naa10	3.51	0.0266
71991	Ercc8	3.51	0.022
21388	Tbx5	3.5	0.0231
54610	Tbc1d8	3.5	0.0192
19891	Rpa2	3.5	0.0322
100216534	Snord96a	3.49	0.0298
258822	Olfr39	3.49	0.0489
69187	Erp27	3.49	0.0409
19011	Endou	3.49	0.0185
320508	Cachd1	3.49	0.0175
70772	Ggnbp1	3.48	0.0227
140904	Caln1	3.48	0.0265
68992	Zfp580	3.47	0.0315
209692	Dhtkd1	3.46	0.0262
100503199	5430416N02Rik	3.46	0.0198
106369	Ypel1	3.45	0.0199
100217446	Snord47	3.45	0.0455
56517	Slc22a21	3.44	0.0273
69324	1700012B07Rik	3.44	0.0333
100416830	Zfp572	3.43	0.023
19655	Rbmx	3.43	0.0267
258921	Olfr1188	3.43	0.0187
114142	Foxp2	3.43	0.0281
12014	Bach2	3.43	0.0313
170716	Cyp4f13	3.42	0.0361
268756	Gulo	3.41	0.037
72556	Zfp566	3.4	0.0385
15424	Hoxc5	3.39	0.035
70533	Btf3l4	3.39	0.0196
66548	Adamtsl5	3.39	0.0402
232875	Zscan18	3.38	0.0243
93724	Pcdhga12	3.38	0.0228
621335	Gm6213	3.37	0.0334
108013	Celf4	3.37	0.0401
69315	1700001L19Rik	3.37	0.0285
59032	Ppp2r3c	3.36	0.0308
338370	Nalcn	3.36	0.045
67432	Hoga1	3.36	0.0274
55994	Smad9	3.35	0.0405
101359	Prrt4	3.34	0.042
14853	Gspt2	3.34	0.0215
21385	Tbx2	3.33	0.0214
434064	Gm5577	3.33	0.0286
238276	Akap5	3.33	0.0209
14137	Fdft1	3.32	0.024
68952	Fam57b	3.32	0.0222
14357	Dtx1	3.32	0.0211
100216539	Snord4a	3.31	0.0235
328778	Rab26	3.31	0.0378
75210	Prr3	3.31	0.0243
229320	Clrn1	3.31	0.032
57743	Sec61a2	3.3	0.0307
22654	Zfp13	3.28	0.0219
223665	C030006K11Rik	3.28	0.0248
16834	Cog1	3.27	0.0253
225523	Cep120	3.27	0.0223
233246	Ano5	3.26	0.031
75140	Slxl1	3.25	0.0255
18779	Pla2r1	3.25	0.0243
72480	Tspyl4	3.24	0.025
16909	Lmo2	3.24	0.0334
330450	Far2	3.24	0.0237
12959	Cryba4	3.24	0.0373
11752	Anxa8	3.24	0.0314
58193	Extl2	3.23	0.0426
258444	Olfr694	3.22	0.0252
16399	Itga2b	3.22	0.0325
244713	Zfp317	3.21	0.0241
140629	Ubox5	3.21	0.0352
11775	Ap3b2	3.21	0.0247
20930	Surf1	3.19	0.0259
171186	Vmn1r38	3.18	0.0255
224143	Poglut1	3.18	0.0343
100628597	Mir5128	3.18	0.0246
12579	Cdkn2b	3.18	0.0409
56734	Tulp2	3.17	0.0326
20850	Stat5a	3.17	0.0351
723873	Mir470	3.17	0.0379
20516	Slc20a2	3.16	0.0379
209540	Rgag1	3.16	0.0333
13116	Cyp46a1	3.16	0.0452
215493	A3galt2	3.16	0.0329
78449	2700046A07Rik	3.16	0.042
69956	Ptcd3	3.14	0.0331
56017	Slc2a8	3.13	0.0356
57274	Slc16a8	3.13	0.0302
18314	Olfr17	3.13	0.0431
268395	Mpg	3.13	0.0498
50723	Icosl	3.13	0.0379
66757	Adat2	3.13	0.0409
74098	0610037L13Rik	3.13	0.0262
219150	Hmbox1	3.12	0.0366
12903	Crabp1	3.12	0.0327
319670	Eml5	3.11	0.0377
73322	1700039E22Rik	3.11	0.0391
106529	Tecr	3.1	0.0467
100316783	Mir1b	3.1	0.0288
100993	AW549542	3.1	0.044
22238	Ugt2b5	3.09	0.0333
15574	Hus1	3.09	0.0423
100039641	E330012B07Rik	3.09	0.0283
57914	Crlf2	3.09	0.0321
103712	6330403K07Rik	3.09	0.0444
67157	2610301B20Rik	3.09	0.0381
259063	Olfr691	3.08	0.0408
74772	Atp13a2	3.08	0.0319
381798	4930590J08Rik	3.08	0.0447
735261	Mir684-2	3.07	0.0385
381633	Gm1673	3.07	0.0387
217356	Tmc8	3.06	0.0378
20408	Sh3gl3	3.06	0.0286
574418	Serinc4	3.06	0.028
235402	Lingo1	3.06	0.0286
230233	Ikbkap	3.06	0.0286
238057	Gdf7	3.06	0.0435
67824	Nmral1	3.05	0.0477
217219	Fam171a2	3.05	0.0312
12325	Camk2g	3.05	0.037
56327	Arl2	3.05	0.0441
67025	Rpl11	3.04	0.0488
404310	Olfr199	3.04	0.031
30952	Cngb3	3.04	0.0302
75819	4930509K18Rik	3.04	0.0483
110333	Rmst	3.03	0.0461
105837	Mtbp	3.03	0.032
381338	Lonrf2	3.03	0.0395
15413	Hoxb5	3.03	0.04
360220	Speer4d	3.02	0.0416
100043235	Gm4305	3.01	0.035
171277	Vmn1r211	3	0.0437
74479	Snx11	3	0.0314
270106	Rpl13	3	0.0388
320916	Wscd2	2.99	0.0469
100043902	Six3os1	2.99	0.0308
100191037	Krtap10-4	2.99	0.0307
18094	Nkx2-9	2.98	0.0309
16835	Ldlr	2.98	0.0321
100503496	LOC100503496	2.98	0.0454
271144	Ankdd1b	2.98	0.0372
11550	Adra1d	2.98	0.0432
78895	Pus7l	2.97	0.0463
217588	Mbip	2.97	0.0402
100043513	Gm4489	2.97	0.0335
67621	Bend5	2.97	0.0314
28113	Tinf2	2.96	0.0379
22771	Zic1	2.95	0.0318
70237	Bhlhb9	2.95	0.0405
319482	9530053A07Rik	2.95	0.0318
330319	Wipf3	2.94	0.0321
258249	Olfr845	2.94	0.0435
26919	Zfp346	2.93	0.0327
77577	Spns3	2.93	0.0453
72555	Shisa9	2.93	0.0451
71474	Ppp6r2	2.93	0.0332
100526540	Mir3093	2.93	0.0367
16694	Krtap12-1	2.93	0.0399
280635	Emilin3	2.93	0.0363
13048	Cux2	2.93	0.0361
93883	Pcdhb12	2.92	0.0373
258983	Olfr1260	2.92	0.0385
668303	Kif26a	2.92	0.0336
13117	Cyp4a10	2.92	0.0358
23833	Cd52	2.92	0.0347
66948	Acad8	2.92	0.0397
72395	2610028E06Rik	2.92	0.033
628946	Vmn1r77	2.91	0.0385
72133	Trub1	2.91	0.0334
241989	Pabpc4l	2.91	0.0334
15902	Id2	2.91	0.0424
107047	Psmg2	2.9	0.036
18642	Pfkm	2.9	0.0428
208691	Eif5a2	2.9	0.0467
12683	Cidea	2.9	0.0379
21386	Tbx3	2.89	0.0474
74061	4933404K08Rik	2.89	0.0389
320150	Zdhhc17	2.88	0.035
20250	Scd2	2.88	0.0346
72780	Rspo3	2.88	0.0481
170787	Hdac10	2.88	0.0433
108067	Eif2b3	2.88	0.0397
69603	2310020H05Rik	2.88	0.0355
14467	Gbas	2.87	0.0356
381693	Wdr95	2.86	0.049
100217453	Snord16a	2.86	0.0393
259014	Olfr1047	2.86	0.037
66240	Kcne1l	2.85	0.0413
319157	Hist1h4f	2.85	0.0475
193286	BC049762	2.85	0.0418
433766	Trim63	2.84	0.0391
72181	Nsun4	2.84	0.0397
101490	Inpp5f	2.84	0.0365
105352	Dusp22	2.84	0.0485
68170	B230118H07Rik	2.84	0.046
12155	Bmp15	2.82	0.0461
100316725	Mir2136	2.81	0.0394
74947	Kif4-ps	2.81	0.0471
67242	Gemin6	2.81	0.046
54140	Avpr1a	2.81	0.0481
71106	4933413J09Rik	2.81	0.042
74195	Elp3	2.8	0.0386
258485	Olfr724	2.79	0.0389
100135654	Rhox3c	2.78	0.039
381404	Pabpc1l	2.77	0.0423
14872	Gstt2	2.77	0.0399
75141	Rasd2	2.76	0.0434
50997	Mpp2	2.76	0.0419
102941	B630019K06Rik	2.76	0.0399
73729	Zfp383	2.75	0.0496
208968	Zfp280c	2.75	0.0418
100124476	Mir504	2.75	0.0416
215274	Il1f10	2.74	0.0473
50787	Hs6st3	2.74	0.0471
330790	Hapln4	2.74	0.0423
77397	9530003J23Rik	2.74	0.0414
723837	Mir32	2.73	0.0425
100041694	Gm10451	2.73	0.0416
723874	Mir483	2.72	0.0416
574402	Gpr17	2.72	0.0417
73873	Fam161a	2.71	0.0452
327963	Zfp616	2.7	0.0428
68070	Pdzd2	2.7	0.043
94187	Zfp423	2.69	0.0489
75404	Arhgap36	2.69	0.0457
72661	Serp2	2.68	0.0455
319984	Jph4	2.67	0.0456
15434	Hoxd3	2.67	0.0492
54006	Deaf1	2.67	0.0444
13035	Ctsg	2.67	0.0447
116811	Zim3	2.66	0.0473
76897	Ralyl	2.65	0.0483
12289	Cacna1d	2.65	0.048
73815	4930404H11Rik	2.65	0.0456
435755	Gm5712	2.64	0.0478
73634	1700125H20Rik	2.64	0.0481
259010	Olfr393	2.63	0.047
243085	Ugt2b35	2.61	0.0492
111002	Marcksl1-ps4	2.61	0.0485
56522	Papolb	2.6	0.0484
434396	Gm5615	2.59	0.0494
11440	Chrna6	2.59	0.0491
381802	Tsen2	2.58	0.0497
217378	Dnajc27	2.58	0.0491
625963	Gm6639	-2.57	0.0499
17274	Rab8a	-2.58	0.0497
320191	Hook3	-2.59	0.049
259105	Olfr549	-2.64	0.0464
382384	Odf3l2	-2.64	0.046
70466	Ckap2l	-2.64	0.0463
12489	Cd33	-2.64	0.0459
217517	Stxbp6	-2.65	0.0471
14559	Gdf1	-2.65	0.0459
14260	Fmn1	-2.65	0.0464
233902	Fbxl19	-2.65	0.0459
268741	Tox4	-2.66	0.0448
67742	Samsn1	-2.66	0.0449
14625	Gykl1	-2.66	0.0458
28040	D6Wsu163e	-2.66	0.0456
15511	Hspa1b	-2.67	0.0463
432649	Gm5434	-2.67	0.0444
12237	Bub3	-2.67	0.0443
404710	Iqgap3	-2.68	0.0498
14963	H2-Bl	-2.68	0.0442
100042295	Gm3776	-2.68	0.0439
66899	Fip1l1	-2.68	0.0452
328829	9830107B12Rik	-2.68	0.0447
56338	Txnip	-2.69	0.0457
245126	Tarm1	-2.69	0.0434
65116	Prrg2	-2.69	0.0458
100526478	Mir3081	-2.69	0.0486
235497	Leo1	-2.69	0.044
319314	A930001C03Rik	-2.69	0.0457
268885	Stfa2l1	-2.7	0.0434
57279	Slc25a20	-2.7	0.0448
71861	Zswim2	-2.71	0.044
93735	Wnt16	-2.71	0.0427
54198	Snx3	-2.71	0.0423
18023	Nfe2l1	-2.71	0.0498
70186	Fam162a	-2.71	0.0473
75221	Dpp3	-2.71	0.0487
18829	Ccl21a	-2.71	0.0452
22038	Plscr1	-2.72	0.0441
15894	Icam1	-2.72	0.0491
672682	Gm9573	-2.72	0.0428
329739	Fam102b	-2.72	0.048
23830	Capn10	-2.72	0.042
19661	Rbp3	-2.73	0.0436
79264	Krit1	-2.73	0.0416
16150	Ikbkb	-2.73	0.0459
72552	Hsdl1	-2.73	0.0482
52009	Hn1l	-2.73	0.0424
67464	Entpd4	-2.73	0.0464
320189	9430076C15Rik	-2.73	0.0415
53610	Nono	-2.74	0.041
17199	Mc1r	-2.74	0.0493
50527	Ero1l	-2.74	0.0476
71182	4933417G07Rik	-2.74	0.0407
74019	Traf3ip1	-2.75	0.0482
77634	Snapc3	-2.75	0.049
17936	Nab1	-2.75	0.0423
73804	Kif2c	-2.75	0.0421
14939	Gzmb	-2.75	0.043
57295	Icmt	-2.77	0.044
231637	Ssh1	-2.78	0.0424
109305	Orai1	-2.78	0.0466
100124463	Mir105	-2.78	0.0391
227357	Espnl	-2.78	0.0391
11977	Atp7a	-2.78	0.0419
21762	Psmd2	-2.79	0.0383
76614	Immt	-2.79	0.0395
72102	Dusp11	-2.79	0.0429
76643	1700121L16Rik	-2.79	0.0386
69347	1700008P02Rik	-2.79	0.0426
434377	Zfp560	-2.8	0.0427
81535	Sgpp1	-2.8	0.0417
26378	Decr2	-2.8	0.0399
56857	Slc37a2	-2.81	0.0479
59029	Psmd14	-2.81	0.0376
226151	Fam178a	-2.81	0.0376
13383	Dlg1	-2.81	0.0389
259022	Olfr1061	-2.82	0.0419
56620	Clec4n	-2.82	0.0444
16621	Klkb1	-2.83	0.0398
109006	Ciapin1	-2.83	0.0368
12177	Bnip3l	-2.83	0.0385
11947	Atp5b	-2.83	0.048
24087	Tll2	-2.84	0.048
53380	Psmd10	-2.84	0.0363
80750	N4bp1	-2.84	0.0367
224754	H2-M11	-2.84	0.0377
232946	Bloc1s3	-2.84	0.0432
22324	Vav1	-2.85	0.0421
110593	Prdm2	-2.85	0.041
70495	Atp6ap2	-2.85	0.044
213988	Tnrc6b	-2.86	0.0455
72825	Mon1a	-2.86	0.0364
19656	Rbmxl1	-2.87	0.04
51810	Hnrnpu	-2.87	0.0478
56315	Rhcg	-2.88	0.0346
29870	Gtse1	-2.88	0.0348
108671	Dnajc9	-2.88	0.0452
56150	Mad2l1	-2.89	0.0398
14194	Fh1	-2.89	0.0413
12516	Cd7	-2.89	0.0358
12468	Cct7	-2.89	0.0495
338364	Trim65	-2.9	0.0337
66058	Tmem176a	-2.9	0.0352
66977	Nuf2	-2.9	0.0346
56812	Dnajb2	-2.9	0.0343
107182	Btaf1	-2.9	0.0367
68842	Tulp4	-2.91	0.0336
387355	Tas2r130	-2.91	0.0481
67052	Ndc80	-2.91	0.0364
17474	Clec4d	-2.91	0.0402
98828	Cdc123	-2.91	0.0435
230972	Arhgef16	-2.91	0.0426
24086	Tlk2	-2.92	0.0436
19712	Rest	-2.92	0.0331
70024	Mcm10	-2.92	0.0446
15109	Hal	-2.92	0.0347
77110	Gpbp1l1	-2.92	0.0329
76108	Rap2a	-2.93	0.0375
18037	Nfkbie	-2.93	0.0469
229841	Cenpe	-2.93	0.0331
71856	Wfdc3	-2.94	0.0359
21374	Tbp	-2.94	0.039
104384	Rhox9	-2.94	0.0367
75599	Pcdh1	-2.94	0.0326
214766	Mmp21	-2.94	0.0457
74864	4930449E01Rik	-2.94	0.0448
226541	Klhl20	-2.95	0.0498
67981	Hormad1	-2.95	0.0483
11983	Atpif1	-2.95	0.0373
74493	Tnks2	-2.96	0.0329
21887	Tle3	-2.96	0.0408
20197	S100a3	-2.96	0.033
67150	Rnf141	-2.96	0.0465
723857	Mir377	-2.96	0.0351
16478	Jund	-2.96	0.0469
76415	Fam187b	-2.96	0.042
54721	Tyk2	-2.97	0.0391
20193	S100a1	-2.97	0.0434
66905	Plin3	-2.97	0.0329
74185	Gbe1	-2.98	0.0334
20430	Cyfip1	-2.99	0.031
214498	Cdc73	-2.99	0.0307
20878	Aurka	-2.99	0.0401
28080	Atp5o	-2.99	0.0396
21991	Tpi1	-3	0.0317
54673	Sh3glb1	-3	0.0343
245839	Gzmn	-3	0.0315
66694	Uqcrfs1	-3.01	0.0444
268465	Eme1	-3.01	0.0352
20422	Shfm1	-3.02	0.0451
26395	Map2k1	-3.02	0.0325
76479	Smndc1	-3.03	0.0319
258418	Olfr469	-3.03	0.0407
53599	Cd164	-3.03	0.0305
237911	Brip1	-3.03	0.0346
66929	Asf1b	-3.03	0.0473
30938	Fgd3	-3.04	0.042
53872	Caprin1	-3.04	0.0307
21899	Tlr6	-3.05	0.0294
214897	Csnk1g1	-3.05	0.0302
57781	Cd200r1	-3.05	0.0338
11909	Atf2	-3.05	0.0345
100124453	Mir654	-3.06	0.0299
16495	Kcna7	-3.06	0.0425
18506	Pax4	-3.07	0.0418
241624	Exd1	-3.07	0.0495
432867	Defb48	-3.07	0.0348
26431	Git2	-3.08	0.0399
245511	4930415L06Rik	-3.08	0.0315
68453	Gpihbp1	-3.09	0.0313
671003	Gm9513	-3.09	0.0428
100039377	Gm10096	-3.09	0.0424
16543	Mdfic	-3.1	0.0462
67592	4930524B15Rik	-3.1	0.0287
21378	Tbrg3	-3.11	0.0267
230598	Nrd1	-3.11	0.0453
18034	Nfkb2	-3.11	0.0297
230376	Haus6	-3.11	0.0384
70909	4921504E06Rik	-3.11	0.0269
14228	Fkbp4	-3.12	0.0278
13690	Eif4g2	-3.12	0.0319
223753	Cerk	-3.12	0.0473
268420	Alkbh5	-3.12	0.0466
56513	Pard6a	-3.13	0.026
15024	H2-T10	-3.13	0.0407
14804	Grid2	-3.13	0.0384
109332	Cdcp1	-3.13	0.0292
74670	Zfp943	-3.14	0.0407
26934	Racgap1	-3.14	0.031
53331	Stx7	-3.15	0.031
100217415	Scarna6	-3.15	0.0275
270160	Rab39	-3.15	0.0335
67139	Mis12	-3.15	0.0369
100041449	Cyp3a59	-3.15	0.0378
232400	BC048546	-3.15	0.0268
78221	4930567J20Rik	-3.15	0.0256
240055	Neurl1b	-3.16	0.0477
11363	Acadl	-3.16	0.0301
19317	Qk	-3.17	0.0309
258051	Olfr93	-3.17	0.0311
66707	Nkapl	-3.17	0.032
213002	Ifitm6	-3.17	0.0308
634825	Gm14851	-3.17	0.0296
107035	Fbxo38	-3.17	0.0325
20662	Sos1	-3.18	0.0273
67844	Rab32	-3.18	0.0451
71623	Krtap5-2	-3.18	0.0245
14359	Fxr1	-3.18	0.0408
100503619	E330011O21Rik	-3.18	0.0429
23802	Amfr	-3.18	0.0278
17345	Mki67	-3.19	0.0348
75296	Fgfr1op	-3.19	0.0456
52004	Cdk2ap2	-3.19	0.0336
73532	1700080E11Rik	-3.19	0.0251
216225	Slc5a8	-3.2	0.024
258811	Olfr926	-3.2	0.0247
67948	Fbxo28	-3.2	0.0371
72512	Tmem173	-3.21	0.0296
17874	Myd88	-3.21	0.0311
54199	Ccrl2	-3.21	0.0339
19204	Ptafr	-3.22	0.0321
246746	Cd300lf	-3.23	0.0275
212391	Lcor	-3.24	0.0404
14944	Gzmg	-3.24	0.0346
71186	4933417D19Rik	-3.24	0.0477
233987	Zfp958	-3.25	0.0384
233826	Palb2	-3.25	0.0228
13486	Dr1	-3.25	0.0444
240832	Tor1aip2	-3.26	0.0234
16424	Itih1	-3.26	0.0393
224647	D17Wsu92e	-3.26	0.0441
105976	AU022793	-3.26	0.0226
66866	Nhlrc2	-3.27	0.0267
16592	Fabp5	-3.27	0.0252
66075	Chchd3	-3.27	0.0388
12768	Ccr1	-3.27	0.0361
22284	Usp9x	-3.28	0.031
16906	Lmnb1	-3.28	0.0312
223455	2016-03-06	-3.29	0.0217
268980	Strn	-3.3	0.045
225887	Ndufs8	-3.3	0.025
171278	Vmn1r197	-3.31	0.0432
66832	Rsph3a	-3.31	0.032
18970	Polb	-3.31	0.0308
668128	Gm8989	-3.31	0.0219
627585	Gm13034	-3.31	0.024
108160	Fam50a	-3.31	0.023
18431	Oca2	-3.32	0.041
14004	Chchd2	-3.32	0.027
320558	Sycp2	-3.33	0.021
217864	Rcor1	-3.33	0.0209
56295	Higd1a	-3.33	0.0221
231991	Creb5	-3.33	0.0375
14751	Gpi1	-3.34	0.0218
12211	Birc6	-3.34	0.0375
116849	Iltifb	-3.35	0.0329
238386	Btbd7	-3.35	0.0227
22362	Vpreb1	-3.36	0.0234
16649	Kpna4	-3.36	0.042
320203	C130071C03Rik	-3.36	0.0315
12168	Bmpr2	-3.36	0.0203
22627	Ywhae	-3.37	0.0427
56212	Rhog	-3.37	0.0215
404335	Olfr1535	-3.38	0.0286
80910	Gpr84	-3.38	0.0229
226414	Dars	-3.38	0.0256
224572	Vmn2r102	-3.39	0.0378
320500	Tmem215	-3.39	0.0388
73373	Phospho2	-3.41	0.0242
22763	Zfr	-3.42	0.0325
20557	Slfn3	-3.42	0.0234
11972	Atp6v0d1	-3.42	0.0266
70045	2610528A11Rik	-3.42	0.0308
76609	1700065O20Rik	-3.42	0.0227
103733	Tubg1	-3.43	0.0265
56044	Rala	-3.43	0.0196
545417	Olfr367-ps	-3.43	0.0275
214106	4933430I17Rik	-3.44	0.0338
70831	Krtap31-1	-3.45	0.0234
51786	Cpsf2	-3.45	0.0195
320011	Uggt1	-3.46	0.0207
70356	St13	-3.46	0.0378
18643	Pfn1	-3.46	0.0197
791074	Mir802	-3.46	0.0181
791070	Mir744	-3.46	0.0247
68026	2810417H13Rik	-3.47	0.0326
18655	Pgk1	-3.48	0.047
11434	Acr	-3.49	0.0176
77877	6030458C11Rik	-3.49	0.0443
14058	F10	-3.5	0.0226
232286	Tmf1	-3.51	0.0206
24071	Synj2bp	-3.51	0.0208
20867	Stip1	-3.51	0.0379
15505	Hsph1	-3.51	0.0261
78339	Ttyh3	-3.52	0.0315
620966	Gm6194	-3.53	0.0313
433667	Ankrd13c	-3.53	0.0171
378430	Nanos2	-3.54	0.0289
266744	Lgsn	-3.54	0.0174
15159	Hccs	-3.54	0.0196
328695	Gm813	-3.57	0.017
106840	Unc119b	-3.58	0.0352
21973	Top2a	-3.58	0.0224
16828	Ldha	-3.59	0.0184
14997	H2-M9	-3.59	0.0158
227885	Gm13498	-3.6	0.0156
77772	Dcst1	-3.6	0.0182
68970	Dcaf12	-3.6	0.0314
11639	Ak4	-3.6	0.0266
76497	Ppp1r11	-3.61	0.0203
100038556	Gm10445	-3.62	0.0232
235028	Zfp426	-3.63	0.0171
54712	Plxnc1	-3.63	0.0215
18107	Nmt1	-3.63	0.0169
407243	Tmem189	-3.64	0.0328
100561	Slc15a4	-3.64	0.0225
71988	Esco2	-3.64	0.0309
328833	Treml2	-3.65	0.0148
100041515	Gm3383	-3.65	0.0158
54353	Skap2	-3.66	0.0187
234736	Rfwd3	-3.66	0.0188
14083	Ptk2	-3.67	0.0361
258892	Olfr126	-3.67	0.0275
387165	Mir147	-3.67	0.0154
110750	Cse1l	-3.67	0.0318
171184	Vmn1r36	-3.68	0.0267
24055	Sh3bp2	-3.68	0.0197
15516	Hsp90ab1	-3.68	0.0217
226517	Smg7	-3.69	0.0192
20219	Apcs	-3.69	0.0265
100124461	Mir882	-3.7	0.0384
71679	Atp5h	-3.7	0.0201
22381	Wbp5	-3.71	0.0235
387167	Mir149	-3.71	0.0161
338366	Mia3	-3.72	0.0241
667273	Vmn1r115	-3.73	0.0272
68743	Anln	-3.73	0.0241
77891	Ube2s	-3.74	0.0208
17688	Msh6	-3.74	0.0203
217835	Rin3	-3.75	0.0431
18142	Npas1	-3.75	0.0138
14913	Guca1a	-3.75	0.0143
19258	Ptpn4	-3.76	0.0309
52036	Ppp6r3	-3.76	0.0226
319518	Pdpr	-3.76	0.0306
546747	Olfr220	-3.76	0.0143
619327	G630093K05Rik	-3.76	0.0137
18405	Orm1	-3.77	0.0138
232157	Mob1a	-3.77	0.0275
78244	Dnajc21	-3.77	0.0247
70884	Ccdc81	-3.77	0.0158
68904	Abhd13	-3.77	0.0139
106583	Scaf8	-3.78	0.0171
74127	Krt80	-3.78	0.0233
387146	Mir127	-3.79	0.0171
78303	Hist3h2ba	-3.79	0.0132
67689	Aldh3b1	-3.79	0.0142
110380	Shroom2	-3.8	0.0163
75710	Rbm12	-3.8	0.0303
258343	Olfr397	-3.8	0.0206
71690	Esm1	-3.8	0.0263
75279	4930555B11Rik	-3.8	0.0183
71702	Cdc5l	-3.82	0.0248
214895	Lman2l	-3.83	0.0127
232717	Prss58	-3.84	0.0121
18750	Prkca	-3.84	0.0135
21847	Klf10	-3.84	0.0196
74409	Hyal6	-3.84	0.0159
279572	Tlr13	-3.85	0.0125
12323	Camk2b	-3.85	0.0158
66912	Bzw2	-3.85	0.0173
67504	Rnf151	-3.86	0.012
70247	Psmd1	-3.86	0.0143
107435	Hat1	-3.86	0.0173
665615	Gm7714	-3.86	0.0154
15502	Dnaja1	-3.86	0.0155
69311	1700008K24Rik	-3.86	0.0315
14544	Gda	-3.87	0.0144
66070	Cwc15	-3.87	0.0199
258520	Olfr849	-3.88	0.0189
100041375	Cyp3a41b	-3.88	0.0217
73133	3110021N24Rik	-3.88	0.03
381536	Gm12789	-3.89	0.0133
219144	Arl11	-3.89	0.0233
66853	Pnpla2	-3.9	0.0115
218441	Zfyve16	-3.91	0.0145
723822	Mir218-1	-3.91	0.0121
20908	Stx3	-3.92	0.0161
408196	Gm5416	-3.92	0.0163
12301	Cacybp	-3.92	0.0176
58860	Adamdec1	-3.92	0.0303
22177	Tyrobp	-3.93	0.0265
18791	Plat	-3.93	0.0273
18641	Pfkl	-3.93	0.0189
78213	4930563M20Rik	-3.93	0.0278
387586	Ssxb5	-3.94	0.0115
72656	Ints8	-3.94	0.0122
234086	Erich1	-3.94	0.0116
12449	Ccnf	-3.94	0.024
67123	Ubap1	-3.95	0.0146
19349	Rab7	-3.95	0.0131
270096	Mon1b	-3.95	0.0145
12343	Capza2	-3.95	0.0109
71840	Tekt4	-3.96	0.015
12309	S100g	-3.96	0.0121
386612	Thoc6	-3.97	0.0108
103583	Fbxw11	-3.97	0.0237
100526510	Mir3107	-3.98	0.0131
16164	Il13ra1	-3.98	0.0205
58220	Pard6b	-4	0.0211
12235	Bub1	-4	0.0171
21942	Tnfrsf9	-4.02	0.0268
12977	Csf1	-4.03	0.0252
76238	Grhpr	-4.04	0.0189
637908	Vmn2r53	-4.07	0.0145
65961	Utp3	-4.07	0.0254
14599	Gh	-4.07	0.0159
215615	Rnpep	-4.09	0.0363
19177	Psmb7	-4.09	0.0148
100526536	Mir669a-7	-4.11	0.0174
331487	Uprt	-4.12	0.00959
100039948	Rhox2c	-4.13	0.00919
258720	Olfr516	-4.13	0.00921
258676	Olfr1424	-4.14	0.00932
109778	Blvra	-4.16	0.0271
228061	Agps	-4.16	0.00976
14289	Fpr2	-4.18	0.0162
18106	Cd244	-4.18	0.00979
68463	Mrpl14	-4.19	0.00934
319189	Hist2h2bb	-4.19	0.0108
72590	Ppme1	-4.21	0.0194
73270	1700024F13Rik	-4.22	0.00941
66877	Crnkl1	-4.26	0.0129
20533	Slc4a1	-4.28	0.0176
100217466	Scarna17	-4.28	0.0103
66931	1700010I14Rik	-4.3	0.0119
12962	Crybb3	-4.33	0.0104
69696	2310057N15Rik	-4.33	0.0134
72776	Sass6	-4.34	0.0264
17764	Mtf1	-4.35	0.0266
19211	Pten	-4.36	0.00767
74039	Nfam1	-4.36	0.00735
17101	Lyst	-4.37	0.0463
193740	Hspa1a	-4.37	0.0113
231510	Agpat9	-4.37	0.022
230784	Sesn2	-4.39	0.0137
19737	Rgs5	-4.39	0.0146
68693	Hnrnpul2	-4.4	0.0116
269862	Olfr1349	-4.41	0.00851
12564	Cdh8	-4.44	0.00682
66309	Tmem128	-4.46	0.00801
53382	Txnl1	-4.47	0.0203
103711	Pnpo	-4.47	0.0208
622320	Kctd21	-4.47	0.0107
56697	Akap10	-4.47	0.0124
233781	Xylt1	-4.48	0.00696
22031	Traf3	-4.48	0.00816
81489	Dnajb1	-4.48	0.0194
217653	Mis18bp1	-4.49	0.0109
18130	Ints6	-4.5	0.00686
66917	Chordc1	-4.6	0.0166
629219	Sult2a6	-4.63	0.0115
399603	Fam84b	-4.64	0.0416
12870	Cp	-4.64	0.0267
382239	Cpxcr1	-4.65	0.00706
320148	B430306N03Rik	-4.68	0.0085
74359	4931414P19Rik	-4.7	0.00683
13626	Eed	-4.71	0.00565
258153	Olfr412	-4.72	0.00527
258897	Olfr1201	-4.75	0.016
240334	Pcyox1l	-4.76	0.00509
101568	Vrk3	-4.78	0.00967
433256	Acsl5	-4.78	0.0071
11705	Amh	-4.79	0.00819
209824	Vmn1r183	-4.81	0.00515
20558	Slfn4	-4.82	0.00562
16993	Lta4h	-4.82	0.015
735253	Mir488	-4.84	0.00506
667977	Gm8909	-4.85	0.0047
71777	Ing3	-4.87	0.0144
72042	Cotl1	-4.9	0.00668
239167	Synb	-4.91	0.00451
50785	Hs6st1	-4.91	0.00641
100233175	AK010878	-4.95	0.00745
381305	Rc3h1	-4.98	0.00432
207521	Dtx4	-4.98	0.0134
79233	Zfp319	-5	0.0117
13618	Ednrb	-5.02	0.0131
228413	Prrg4	-5.04	0.00493
100039211	Gm10649	-5.05	0.00818
23827	Bpnt1	-5.07	0.00537
77652	Zfp955a	-5.23	0.013
16513	Kcnj10	-5.24	0.00923
56189	Prodh2	-5.25	0.00364
278676	AY358078	-5.3	0.00577
65221	Slc15a3	-5.4	0.00305
17096	Lyn	-5.44	0.00695
171263	Vmn1r67	-5.45	0.0041
76464	Casc5	-5.47	0.0028
381673	A330070K13Rik	-5.47	0.00663
74050	4921525O09Rik	-5.48	0.0144
67673	Tceb2	-5.54	0.00304
69543	Capns2	-5.57	0.0127
227789	Olfr358	-5.58	0.0191
244218	Ctf2	-5.59	0.00264
22385	Baz1b	-5.63	0.00558
633093	Gm7104	-5.64	0.0101
226412	R3hdm1	-5.68	0.00449
72033	Tsc22d2	-5.7	0.00312
18648	Pgam1	-5.74	0.00524
20297	Ccl20	-5.75	0.00436
319191	Hist1h2ai	-5.76	0.00994
237782	Smcr8	-5.78	0.0057
112405	Egln1	-5.85	0.00264
69792	Med6	-6	0.00185
18452	P4ha2	-6.02	0.00223
67379	Dedd2	-6.1	0.00205
629820	Gm7008	-6.15	0.00274
67921	Ube2f	-6.18	0.00374
259027	Olfr380	-6.31	0.00162
15204	Herc2	-6.33	0.00157
332397	Nanos1	-6.38	0.00271
214968	Sema6d	-6.46	0.00141
104681	Slc16a6	-6.85	0.00424
193116	Slu7	-7.05	0.00136
217578	Baz1a	-7.08	0.000901
15564	Htr5b	-7.67	0.000745
14011	Etv6	-8.18	0.000927
17344	Pias2	-8.2	0.000734
263876	Spata2	-8.81	0.00196
69706	Lrr1	-9.41	0.00155
70599	Ssfa2	-9.81	0.00106
68310	Zmym1	-10.5	0.000225
101685	Spty2d1	-12.3	0.000489

## Sheet: NPp53 Veh vs NP Veh
Dataset S1B: Differentially expressed genes between NPp53 vehicle versus NP vehicle (p<0.05)
Mouse entrez	Symbol	t-statistics	p-value
68662	Scgb3a1	17.7	6.42e-07
74617	Scpep1	14.4	6.4e-06
57274	Slc16a8	14.2	2.29e-06
67790	Rab39b	11.8	9.85e-05
225659	Cep76	10.9	0.000191
19025	Ctsa	10.7	2.12e-05
18973	Pole	10.6	1.73e-05
13601	Ecm1	10.2	6.84e-05
224171	C330027C09Rik	9.15	4.55e-05
66925	Sdhd	9.11	6.71e-05
12578	Cdkn2a	9.02	7.04e-05
246154	Vasn	8.72	9.74e-05
22242	Umod	8.67	5.87e-05
217066	Gm15698	8.44	6.85e-05
18717	Pip5k1c	8.39	0.000408
71911	Bdh1	8.37	0.000418
67304	3110070M22Rik	8.35	7.79e-05
667772	Myh15	8.29	0.000115
212190	Ubxn10	8.16	0.000682
100039727	1700049E15Rik	8.15	0.000189
626534	Gm6682	7.87	0.000166
66199	Commd4	7.71	0.000327
228836	Dlgap4	7.61	0.00194
234878	BC021891	7.59	0.00013
667281	H60b	7.51	0.000349
16506	Kcnd1	7.44	0.000144
100043899	R3hdml	7.41	0.000167
11764	Ap1b1	7.38	0.000817
71907	Serpina9	7.28	0.000195
30931	Tor1a	7.24	0.000228
16470	Ush1g	7.12	0.000203
286940	Flnb	7.12	0.00102
17836	Mug1	7.1	0.00131
17075	Epcam	7.04	0.000425
57138	Slc12a5	6.96	0.000249
117599	Helb	6.96	0.00109
235431	Coro2b	6.91	0.000375
228368	Slc35c1	6.86	0.000309
237256	Zc3h12d	6.83	0.00146
16516	Kcnj15	6.79	0.000282
234388	Ccdc124	6.79	0.00383
243312	Elfn1	6.64	0.000619
16803	Lbp	6.59	0.000375
56190	Rbm38	6.54	0.000344
20666	Sox11	6.52	0.00036
26971	Pla2g2f	6.5	0.000529
633640	Gm7120	6.49	0.000743
18781	Pla2g2c	6.48	0.00389
12704	Cit	6.48	0.000786
54200	Sult2b1	6.47	0.00249
52815	Ldhd	6.46	0.000833
70523	5730420D15Rik	6.4	0.000506
93841	Uchl4	6.28	0.000462
74246	Gale	6.27	0.000544
231872	Aimp2	6.26	0.00154
226180	Ina	6.22	0.000499
19023	Ppef2	6.18	0.00199
74202	Fblim1	6.15	0.00248
12268	C4b	6.15	0.000483
69534	Avpi1	6.15	0.000559
11287	Pzp	6.13	0.00119
12870	Cp	6.13	0.000928
24088	Tlr2	6.12	0.00074
73750	Whrn	6.09	0.00138
100504464	E230016K23Rik	6.09	0.000549
12683	Cidea	6.09	0.00185
57442	Kcne3	6.07	0.00512
14977	Slc39a7	6.02	0.00055
107350	AW112010	6.02	0.000531
73558	1700110K17Rik	6	0.00369
18082	Nipsnap1	5.99	0.000606
117160	Ttyh2	5.98	0.00107
21452	Tcn2	5.93	0.000633
237987	Otop2	5.91	0.000608
66479	1700029F12Rik	5.89	0.00123
228846	D630003M21Rik	5.87	0.00452
13162	Slc6a3	5.84	0.00109
268445	Ankrd13b	5.83	0.000793
67133	Gp2	5.82	0.00516
19703	Renbp	5.78	0.000885
12257	Tspo	5.76	0.000933
20606	Sstr2	5.76	0.000763
214523	Tmprss4	5.75	0.000954
20112	Rps6ka2	5.74	0.00154
77577	Spns3	5.73	0.000734
14407	Gabrg3	5.71	0.000729
320832	Sirpb1a	5.68	0.00444
69060	Pnlip	5.68	0.000881
245860	Atg9a	5.67	0.00095
72748	Hdhd3	5.65	0.00171
211666	Mgst2	5.64	0.0032
80291	Rilpl2	5.63	0.00086
72709	C1qtnf6	5.62	0.0032
69602	Otop3	5.61	0.00124
15442	Hpse	5.61	0.00296
21832	Thpo	5.58	0.000836
56486	Gabarap	5.58	0.00247
78923	Chsy3	5.58	0.00659
319997	A630001G21Rik	5.58	0.00327
17972	Ncf4	5.56	0.00324
68813	Dock5	5.56	0.0012
83396	Glis2	5.53	0.000925
66132	1110008L16Rik	5.53	0.00559
207259	Zbtb7c	5.52	0.00126
100038575	Gm10635	5.52	0.00192
20973	Syngr2	5.51	0.00108
790910	Gm11201	5.51	0.00265
65112	Pmepa1	5.5	0.004
19221	Ptgfrn	5.48	0.00328
18554	Pcsk7	5.47	0.000939
108013	Celf4	5.47	0.00298
24044	Scamp2	5.44	0.00478
269109	Dpp10	5.44	0.00259
22230	Ufd1l	5.39	0.00104
212632	Iffo2	5.38	0.00162
15465	Hrh1	5.37	0.0027
13481	Dpm2	5.37	0.00131
72043	Sulf2	5.36	0.00113
20502	Slc16a2	5.36	0.00375
102644	Oaf	5.35	0.00109
73046	Glrx5	5.35	0.00116
71957	Cpsf3l	5.35	0.00108
71780	Isyna1	5.34	0.00253
69533	Krtap26-1	5.33	0.0011
21428	Mlx	5.32	0.00424
20568	Slpi	5.31	0.00185
26970	Pla2g2e	5.31	0.00222
243376	Doxl2	5.31	0.00183
407819	BC031181	5.31	0.00151
93883	Pcdhb12	5.3	0.00607
218763	Lrrc3b	5.28	0.00126
67784	Plxnd1	5.26	0.00176
19342	Rab4b	5.22	0.0028
68481	Mpzl1	5.21	0.00384
70231	Gorasp2	5.2	0.00151
66934	Dsn1	5.2	0.00213
433273	Gm5523	5.17	0.00153
497097	Xkr4	5.16	0.00251
21785	Tff2	5.13	0.00601
11541	Adora2b	5.08	0.00178
239017	Ogdhl	5.07	0.00175
69806	Slc39a11	5.06	0.0035
56434	Tspan3	5.05	0.00204
11739	Slc25a4	5.05	0.00166
66314	Tpd52l2	5.04	0.0027
103710	Slc35e4	5.04	0.0017
22072	Prss2	5.04	0.00368
57781	Cd200r1	5.03	0.00154
12345	Capzb	5.03	0.0035
22272	Uqcrq	5.02	0.00155
226977	Actr1b	5.01	0.00368
13358	Slc25a1	5	0.00178
14473	Gc	5	0.00196
68861	1190002N15Rik	4.99	0.00158
18002	Nedd8	4.98	0.00233
231134	Dok7	4.92	0.0142
20621	Snn	4.9	0.00354
18359	Olfr59	4.9	0.00216
14775	Gpx1	4.88	0.00542
50917	Galns	4.87	0.00182
12215	Bsg	4.87	0.00764
28113	Tinf2	4.86	0.00195
19089	Prkcsh	4.86	0.00189
27402	Pdhx	4.86	0.00221
13446	Doc2a	4.84	0.00246
631304	Cyp4f40	4.84	0.0037
77552	Shisa4	4.83	0.00697
545156	Kalrn	4.83	0.0022
56348	Hsd17b12	4.83	0.00216
24068	Sra1	4.82	0.00207
21938	Tnfrsf1b	4.81	0.00664
17837	Mug2	4.81	0.00207
109674	Ampd2	4.81	0.00723
69572	Mfsd3	4.8	0.00278
12724	Clcn2	4.8	0.00644
13180	Pcbd1	4.79	0.002
17105	Lyz2	4.79	0.0031
12322	Camk2a	4.79	0.0101
56374	Tmem59	4.78	0.00446
20390	Sftpd	4.78	0.00215
240479	Fam69c	4.76	0.00217
78408	Fam131a	4.76	0.0048
675969	Vmn2r76	4.75	0.00972
223693	Tmem184b	4.75	0.00426
227746	Rabepk	4.75	0.00492
52639	Wipi1	4.73	0.00459
98741	Kcnb2	4.73	0.00308
15211	Hexa	4.73	0.00417
216233	Socs2	4.72	0.00292
22232	Slc35a2	4.72	0.00859
317717	Sec22a	4.72	0.00246
17921	Myo7a	4.72	0.00516
16155	Il10rb	4.72	0.0082
116701	Fgfrl1	4.71	0.00218
108058	Camk2d	4.71	0.00322
330836	Slc7a6	4.7	0.0022
77018	Col25a1	4.69	0.00346
20288	Msr1	4.68	0.00587
60364	Donson	4.68	0.00234
243753	2010107G12Rik	4.68	0.0027
66290	Atp6v1g1	4.67	0.00506
216781	Trim58	4.66	0.0159
66628	Thg1l	4.66	0.00653
271127	Adamts16	4.66	0.00812
57783	Tnip1	4.64	0.00284
20932	Surf4	4.64	0.00255
67283	Slc25a19	4.64	0.00816
78894	Aacs	4.64	0.00476
110379	Sec13	4.63	0.00346
208624	Alg3	4.63	0.00255
171469	Gpr37l1	4.62	0.00476
242705	E2f2	4.62	0.00258
22329	Vcam1	4.61	0.00246
667931	Gm8883	4.61	0.00562
11486	Ada	4.61	0.00281
56644	Clec7a	4.6	0.00355
214597	Sidt2	4.59	0.00365
233199	Mybpc2	4.58	0.00351
18807	Pld3	4.57	0.00281
80706	Olfr160	4.57	0.00471
72181	Nsun4	4.57	0.0163
224180	Gm4827	4.57	0.0028
239463	Fam83a	4.57	0.00444
12521	Cd82	4.57	0.00408
107047	Psmg2	4.56	0.00805
14942	Gzme	4.56	0.00412
213673	9530068E07Rik	4.56	0.00281
72685	Dnajc6	4.55	0.00784
14950	H13	4.54	0.0028
52715	Ccdc43	4.54	0.00591
26445	Psmb2	4.53	0.00367
240444	Kcng2	4.53	0.0038
76498	Paqr4	4.52	0.00548
20415	Shbg	4.51	0.00499
217847	Serpina10	4.51	0.00924
20347	Sema3b	4.51	0.00528
231727	B3gnt4	4.51	0.0146
58810	Akr1a1	4.51	0.00781
93732	Acox2	4.51	0.00288
380787	A230065H16Rik	4.51	0.00814
18109	Mycn	4.5	0.0114
237253	Lrp11	4.5	0.00427
27357	Gyg	4.5	0.00311
15972	Ifna9	4.49	0.00295
192188	Stab2	4.48	0.00289
19274	Ptprm	4.48	0.00501
11605	Gla	4.48	0.003
11974	Atp6v0e	4.48	0.0029
26611	Rcn2	4.47	0.00317
76905	Lrg1	4.47	0.0116
70435	Inf2	4.47	0.00655
100302499	Snora3	4.46	0.00642
19185	Psmd4	4.46	0.0033
18438	P2rx4	4.46	0.003
110119	Mpi	4.45	0.0136
72296	Rusc1	4.44	0.00357
14827	Pdia3	4.44	0.0125
71805	Nup93	4.44	0.00502
107449	Unc5b	4.43	0.00305
30933	Tor2a	4.42	0.00366
18037	Nfkbie	4.42	0.00339
231070	Insig1	4.42	0.00347
270066	Slc35e1	4.41	0.00332
231646	Myo1h	4.41	0.00561
381269	Mreg	4.4	0.00431
667766	Gm8801	4.4	0.0124
70802	Pwwp2a	4.39	0.0033
76113	Lpo	4.39	0.00454
71775	1300017J02Rik	4.39	0.0038
407243	Tmem189	4.38	0.0048
216831	Arhgap44	4.38	0.00376
11731	Ang2	4.38	0.00765
192156	Mvd	4.37	0.00465
14941	Gzmd	4.37	0.00632
241230	St8sia6	4.36	0.00395
53860	2017-09-09	4.36	0.0084
14777	Gpx2-ps1	4.36	0.00927
73182	Pear1	4.35	0.00493
14944	Gzmg	4.35	0.00473
12018	Bak1	4.35	0.00757
76252	Atp6v0e2	4.35	0.0151
66220	Zdhhc12	4.33	0.00354
18817	Plk1	4.33	0.0119
14466	Gba	4.33	0.00387
269344	Ell3	4.33	0.0052
53313	Atp2a3	4.33	0.00506
13595	Ebp	4.32	0.00655
228598	Ebf4	4.32	0.00347
16848	Lfng	4.31	0.00578
14776	Gpx2	4.31	0.0124
12044	Bcl2a1a	4.31	0.00402
20443	St3gal4	4.3	0.00365
66054	Cndp2	4.3	0.00378
11553	Adra2c	4.3	0.00359
210573	Tmem151b	4.28	0.00483
21380	Tbx1	4.28	0.00418
102614	Rpp25	4.28	0.00888
74096	Hvcn1	4.28	0.00624
230279	6330416G13Rik	4.28	0.00484
20210	Saa3	4.27	0.00378
75668	Rasl10a	4.27	0.00459
17835	Mug-ps1	4.27	0.00397
14962	Cfb	4.27	0.00382
72729	Cdc42se2	4.27	0.00439
12408	Cbr1	4.27	0.00375
14528	Gch1	4.26	0.00659
12563	Cdh6	4.26	0.00377
26433	Plod3	4.25	0.00474
30955	Pik3cg	4.25	0.00875
59126	Nek6	4.25	0.00658
17387	Mmp14	4.25	0.00942
22041	Trf	4.24	0.00472
109652	Acy1	4.24	0.00581
69674	Mif4gd	4.23	0.00716
28169	Agpat3	4.23	0.00687
108147	Atic	4.22	0.00392
56378	Arpc3	4.22	0.00397
109711	Actn1	4.22	0.00447
100037283	Rnaset2a	4.21	0.00404
78388	Mvp	4.21	0.00409
319899	Dock6	4.21	0.00416
12799	Cnp	4.21	0.00785
12476	Cd151	4.21	0.00519
328829	9830107B12Rik	4.21	0.00539
11803	Aplp1	4.2	0.0122
71699	Slc41a3	4.19	0.00918
19280	Ptprs	4.19	0.00591
66449	Pam16	4.19	0.00677
66861	Dnajc10	4.19	0.00469
217410	Trib2	4.18	0.0047
52398	2017-09-11	4.18	0.00566
109857	Cbr3	4.18	0.012
13200	Ddost	4.16	0.0182
435684	Shf	4.15	0.00887
67264	Ndufb8	4.15	0.00704
17537	Meis3	4.14	0.0166
16647	Kpna2	4.14	0.00856
244144	Usp35	4.13	0.012
52502	Carhsp1	4.13	0.00551
69215	Sat2	4.12	0.0146
258055	Olfr524	4.12	0.0132
11820	App	4.12	0.0051
68728	Trp53inp2	4.1	0.0149
20517	Slc22a1	4.1	0.0053
99237	Tm9sf4	4.09	0.00586
117167	Steap4	4.09	0.00516
24045	Scamp3	4.09	0.00893
235416	Lman1l	4.09	0.00568
217356	Tmc8	4.08	0.00708
219134	Shisa2	4.08	0.00819
14026	Evl	4.08	0.0051
214663	Slc25a29	4.07	0.0114
51799	Rundc3a	4.07	0.00479
66390	Slmo2	4.06	0.00638
100043169	Gm4278	4.06	0.00484
233805	Dcun1d3	4.06	0.00492
114143	Atp6v0b	4.06	0.00583
12812	Coil	4.05	0.00817
257632	Nod2	4.04	0.00492
232345	A2m	4.04	0.00718
105727	Slc38a1	4.03	0.0175
100102	Pcsk9	4.03	0.00541
353167	Tas2r123	4.02	0.00597
64658	Mrps25	4.02	0.00546
74762	Mdga1	4.02	0.00509
54135	Lsr	4.02	0.00694
14067	F5	4.02	0.00545
380694	Ccnjl	4.02	0.0251
170725	Capn8	4.02	0.00664
494546	Taar8c	4.01	0.00702
20495	Slc12a1	4.01	0.00967
276846	Pigs	4.01	0.00611
68479	Phf5a	4	0.00678
241452	Dhrs9	4	0.00664
70450	Unc13d	3.99	0.0101
239393	Lrp12	3.99	0.00907
26426	Nubp2	3.98	0.00588
83924	Gpr137b	3.98	0.00588
100038600	Gm11529	3.98	0.00584
546726	Cyp26c1	3.97	0.00969
20775	Sqle	3.96	0.00624
329554	Gm826	3.96	0.0117
268465	Eme1	3.96	0.00555
20702	Serpina1c	3.95	0.00557
23922	Jtb	3.95	0.00899
384534	Vmn2r52	3.94	0.00604
218739	Sntn	3.94	0.00639
93700	Pcdhgb2	3.94	0.00627
15242	Hhex	3.94	0.00564
14268	Fn1	3.94	0.00558
75095	4930513D17Rik	3.94	0.00558
21877	Tk1	3.93	0.0126
71020	Spats1	3.93	0.00698
54483	Mefv	3.93	0.00792
16917	Lmx1b	3.93	0.00576
71528	9030404E10Rik	3.93	0.00638
71325	Tchhl1	3.92	0.01
19668	Rbpjl	3.92	0.0111
17991	Ndufa2	3.92	0.00662
216892	Spns2	3.91	0.00725
18578	Pde4b	3.91	0.00722
93889	Pcdhb18	3.91	0.0158
26419	Mapk8	3.91	0.0225
16414	Itgb2	3.91	0.0127
64138	Ctsz	3.91	0.00587
22195	Ube2l3	3.9	0.00982
21924	Tnnc1	3.9	0.00619
245865	Spag4	3.9	0.00614
54391	Rfk	3.9	0.0103
170720	Card14	3.9	0.00757
71244	4933436H12Rik	3.9	0.0059
228993	Slc17a9	3.89	0.0117
106522	Pkdcc	3.89	0.00696
18003	Nedd9	3.89	0.00927
239530	Gpr20	3.89	0.00681
394434	Ugt1a9	3.88	0.0129
12631	Cfl1	3.88	0.00849
67179	Ccdc25	3.88	0.0284
107732	Mrpl10	3.87	0.00851
56620	Clec4n	3.87	0.00656
234564	Ces1f	3.87	0.0169
320148	B430306N03Rik	3.87	0.00688
20856	Stc2	3.86	0.00739
67588	Rnf41	3.86	0.00735
216011	Lrrc20	3.86	0.00762
15439	Hp	3.86	0.0146
14241	Foxl1	3.86	0.00752
72832	Crtac1	3.86	0.00885
232933	Ccdc61	3.86	0.00624
70419	2810408A11Rik	3.86	0.00905
79201	Tnfrsf23	3.85	0.00637
58911	Sumf1	3.85	0.00666
20701	Serpina1b	3.85	0.0264
72542	Pgam5	3.85	0.0133
226654	Tstd1	3.84	0.0115
75687	Fam65a	3.84	0.0233
234076	Tmco3	3.83	0.0115
66256	Ssr2	3.83	0.0181
353282	Sfmbt2	3.83	0.00663
19245	Ptp4a3	3.83	0.00988
245526	Pgr15l	3.83	0.00859
239618	Pdzrn4	3.83	0.0167
18419	Otog	3.83	0.00992
66139	Tmem8c	3.82	0.0179
12764	Cmas	3.82	0.00664
71914	Antxr2	3.82	0.00733
56722	Litaf	3.81	0.00703
319765	Igf2bp2	3.81	0.00839
60533	Cd274	3.81	0.00735
239673	4732456N10Rik	3.81	0.00764
241525	Ypel4	3.8	0.00777
69202	Ptms	3.8	0.00956
74277	Chic2	3.8	0.00729
21807	Tsc22d1	3.79	0.0111
71803	Slc25a18	3.79	0.0178
71984	Sars2	3.79	0.00988
50773	Nt5c	3.79	0.00907
20910	Stxbp1	3.78	0.0151
81910	Rrbp1	3.78	0.0128
78816	Gmip	3.78	0.00898
72205	Eml2	3.78	0.00971
22122	Tsta3	3.77	0.0131
100217457	Snord58b	3.77	0.00706
17167	Marco	3.77	0.00766
237436	Gas2l3	3.77	0.0105
70611	Fbxo33	3.77	0.0139
27062	Cadps	3.77	0.00953
73631	1700128A07Rik	3.77	0.00721
72267	Lrrc8e	3.76	0.0212
100043424	Gm14005	3.76	0.00787
13406	Dmp1	3.76	0.0115
94220	Cnnm4	3.76	0.0152
23821	Bace1	3.76	0.0145
73667	2410004P03Rik	3.76	0.00813
66825	Rnf186	3.75	0.0121
71751	Map3k13	3.75	0.00796
30937	Lmcd1	3.75	0.0137
546134	Gramd2	3.75	0.0094
54368	Gp9	3.75	0.00747
57895	Ccdc126	3.75	0.00766
11554	Adrb1	3.75	0.00727
66073	Txndc12	3.74	0.00763
208613	Tmem212	3.74	0.0089
72475	Ssbp3	3.74	0.0115
67857	Ppp6c	3.74	0.00751
17448	Mdh2	3.74	0.00735
15979	Ifngr1	3.74	0.00761
227358	Fam132b	3.74	0.00778
77318	Ankrd55	3.74	0.0107
20249	Scd1	3.73	0.0166
224023	Klhl22	3.73	0.00834
767814	AU019990	3.73	0.0113
320951	Pisd	3.72	0.0234
12945	Dmbt1	3.72	0.0247
76589	Unc5cl	3.71	0.0289
269717	Orai2	3.71	0.00812
17121	Mxd3	3.71	0.0123
66230	Mrps28	3.71	0.0116
14186	Fgfr4	3.71	0.0111
101786	A730082K24Rik	3.71	0.00786
78773	4930511E03Rik	3.71	0.0273
20510	Slc1a1	3.7	0.00794
320769	Prdx6b	3.7	0.0113
17974	Nck2	3.7	0.0078
15976	Ifnar2	3.7	0.0116
67838	Dnajb11	3.7	0.0143
331026	Gmppb	3.69	0.0137
545677	Gm12888	3.69	0.00782
14613	Gja5	3.69	0.00789
232449	Dera	3.69	0.00858
11640	Akap1	3.69	0.0213
30057	Timm8b	3.68	0.00855
20717	Serpina3m	3.68	0.0184
101502	Hsd3b7	3.68	0.0113
74123	Foxp4	3.68	0.0232
52585	Dhrs1	3.68	0.0161
12615	Cenpa	3.68	0.0105
66663	Uba5	3.67	0.0115
258792	Olfr1499	3.67	0.00838
74180	Muc5b	3.67	0.00831
98238	Lrrc59	3.67	0.0081
100910	Chpf2	3.67	0.00936
229595	Adamtsl4	3.67	0.0168
70147	2210019I11Rik	3.67	0.00798
66827	Ttc1	3.66	0.0089
17685	Msh2	3.66	0.0151
26887	Chst4	3.66	0.0153
723860	Mir383	3.65	0.00919
16795	Large	3.65	0.0182
244698	Hephl1	3.65	0.00873
13077	Cyp1a2	3.65	0.0142
20305	Ccl6	3.65	0.00936
15587	Hyal2	3.64	0.0141
67371	Gtf3c6	3.64	0.00836
72141	Adpgk	3.64	0.009
20163	Rsu1	3.63	0.0121
15558	Htr2a	3.63	0.0181
55927	Hes6	3.63	0.0222
56149	Grasp	3.63	0.00974
620079	Gm17751	3.63	0.0112
654820	G530011O06Rik	3.63	0.0132
74747	Ddit4	3.63	0.015
327959	Xaf1	3.62	0.0152
113865	Vmn1r25	3.62	0.0104
77974	Rdh12	3.62	0.00946
19419	Rasgrp1	3.62	0.00962
13082	Cyp26a1	3.62	0.0124
66330	1700020L24Rik	3.62	0.00857
78634	Spaca7	3.61	0.0316
19876	Robo1	3.61	0.00905
117198	Ivns1abp	3.61	0.0124
319150	Hist1h3b	3.61	0.00921
69146	Gsdmd	3.61	0.0198
27214	Dbf4	3.61	0.0169
230603	Ttc39a	3.6	0.0116
268396	Sh3pxd2b	3.6	0.0136
76338	Rab2b	3.6	0.0115
66988	Lap3	3.6	0.00882
73914	Irak3	3.6	0.00922
114601	Ehbp1l1	3.6	0.013
56760	Clec1b	3.6	0.012
215814	Ccdc28a	3.6	0.00891
239337	Adamts12	3.6	0.0123
226999	Slc9a2	3.59	0.0105
19892	Rpe65	3.59	0.0195
16819	Lcn2	3.59	0.00971
73205	3110043O21Rik	3.59	0.0166
103733	Tubg1	3.58	0.0206
64898	Lpin2	3.58	0.0161
18550	Furin	3.58	0.00921
54325	Elovl1	3.58	0.017
80987	Nckipsd	3.57	0.0151
23934	Ly6h	3.57	0.0148
16552	Kif12	3.57	0.0338
623796	Gm12504	3.57	0.015
226243	Habp2	3.56	0.0338
66445	Cyc1	3.56	0.0162
223780	Adm2	3.56	0.0196
225049	Ttc7	3.55	0.0105
330460	Tmem150b	3.54	0.0249
20266	Scn1b	3.54	0.0107
17833	Muc5ac	3.54	0.0124
450219	Gsdma3	3.54	0.0306
71302	Arhgap26	3.54	0.01
632971	Rergl	3.53	0.0149
16783	Lamp1	3.53	0.0105
74754	Dhcr24	3.53	0.0114
12915	Atf6b	3.53	0.0139
74008	Arsg	3.53	0.0321
100503969	1810008I18Rik	3.53	0.0233
74126	Syvn1	3.52	0.01
432572	Specc1	3.52	0.0151
18431	Oca2	3.52	0.0175
227197	Ndufs1	3.52	0.0098
17318	Mid1	3.52	0.0104
76071	Jakmip1	3.52	0.017
100041694	Gm10451	3.52	0.0283
74066	4933404G15Rik	3.52	0.0101
171199	Vmn1r18	3.51	0.0132
97031	Tprn	3.51	0.0103
244237	Tnfrsf26	3.51	0.0105
11988	Slc7a2	3.51	0.0183
69080	Gmppa	3.51	0.0126
13448	Dok1	3.51	0.0117
66260	Tmem54	3.5	0.0118
18753	Prkcd	3.5	0.0116
330695	Ctxn1	3.5	0.0156
380712	Tlcd2	3.49	0.0104
380836	Mrs2	3.49	0.0112
74488	Lrrc15	3.49	0.0173
16440	Itpr3	3.49	0.0156
100038746	Gm1976	3.49	0.0177
69121	Chrdl2	3.49	0.0129
666747	Trim43b	3.48	0.0254
246086	Onecut3	3.48	0.0223
56532	Ripk3	3.47	0.0112
13079	Cyp21a1	3.47	0.0138
13034	Ctse	3.47	0.0234
66317	Wdr61	3.46	0.013
18107	Nmt1	3.46	0.0107
76987	Hdhd2	3.46	0.0107
242914	Gm4961	3.46	0.0109
545667	Fam159a	3.46	0.0231
13510	Dsg1a	3.46	0.0169
53380	Psmd10	3.45	0.0111
258793	Olfr1502	3.45	0.0108
16618	Klk1b26	3.44	0.0121
100502888	Gm19434	3.44	0.0109
12840	Col9a2	3.44	0.0244
72795	Ttc19	3.43	0.0212
22031	Traf3	3.43	0.0152
73836	Slc35b2	3.43	0.0369
23985	Slc26a4	3.43	0.0151
73826	Poldip3	3.43	0.0204
270198	Pfkfb4	3.43	0.0115
110006	Gusb	3.43	0.0205
233781	Xylt1	3.42	0.0113
18749	Prkacb	3.42	0.0113
29806	Limd1	3.42	0.0283
75482	Hspb9	3.42	0.0112
319446	Dpep2	3.42	0.0113
12716	Ckmt1	3.42	0.0389
100383	Bsdc1	3.42	0.0124
94044	Bcl2l13	3.42	0.0114
224024	Scarf2	3.41	0.0222
246710	Rhobtb2	3.41	0.0159
59095	Fxyd6	3.41	0.0115
69747	Zswim7	3.4	0.0115
71365	Pdss2	3.4	0.014
229389	Otol1	3.4	0.0378
66448	Mrpl20	3.4	0.0132
52858	Cdipt	3.4	0.0217
239096	Cdh24	3.4	0.0116
11966	Atp6v1b2	3.4	0.0142
231821	Adap1	3.4	0.0115
66878	Riok3	3.39	0.0131
217365	Nploc4	3.39	0.0124
387224	Mir29c	3.39	0.0148
12630	Cfi	3.39	0.0132
382077	Ccdc33	3.39	0.0131
74992	4930487H11Rik	3.39	0.0178
73811	4930405J17Rik	3.39	0.0155
67710	Polr2g	3.38	0.0137
77782	Polq	3.38	0.0146
52857	Gramd1a	3.38	0.0122
12802	Cnr2	3.38	0.0172
12759	Clu	3.38	0.0119
64176	Sv2b	3.37	0.0148
23969	Pacsin1	3.37	0.0313
53624	Cldn7	3.37	0.0124
105976	AU022793	3.37	0.0194
58248	1700123O20Rik	3.37	0.013
234875	Ttc13	3.36	0.0126
192187	Stab1	3.36	0.0188
268902	Robo2	3.36	0.0256
69656	Pir	3.36	0.0141
433926	Lrrc8b	3.36	0.0178
56692	Lamtor3	3.36	0.0225
53602	Hpcal1	3.36	0.0189
52372	D6Ertd527e	3.36	0.0128
12983	Csf2rb	3.36	0.0122
68229	AI846148	3.36	0.0126
74200	2810403A07Rik	3.36	0.0235
19261	Sirpa	3.35	0.0133
18805	Pld1	3.35	0.014
72157	Pgm2	3.35	0.0126
54563	Nup210	3.35	0.0242
56494	Gosr2	3.35	0.0137
72381	2210409E12Rik	3.35	0.0182
70827	Trak2	3.34	0.0131
100504715	Tmppe	3.34	0.0263
17000	Ltbr	3.34	0.0126
67305	Gpx7	3.34	0.0129
68545	Ecscr	3.34	0.0169
13506	Dsc2	3.34	0.0301
223774	Alg12	3.34	0.0144
16905	Lmna	3.33	0.0251
406219	Krt83	3.33	0.0126
54388	Hils1	3.33	0.0229
12069	Bex2	3.33	0.0135
56208	Becn1	3.33	0.024
67125	Tspan31	3.32	0.0328
52864	Slx4	3.32	0.0148
192192	Shkbp1	3.32	0.0183
71003	Prss41	3.32	0.0385
108767	Pnrc1	3.32	0.013
210992	Lpcat1	3.32	0.0173
16560	Kif1a	3.32	0.0206
14773	Grk5	3.32	0.0224
12856	Cox17	3.32	0.0191
73737	1110008P14Rik	3.32	0.0128
100217446	Snord47	3.31	0.013
227731	Slc25a25	3.31	0.0195
18643	Pfn1	3.31	0.0181
93890	Pcdhb19	3.31	0.0197
52552	Parp8	3.31	0.0132
13666	Eif2ak3	3.3	0.0239
73449	1700066B19Rik	3.3	0.0134
71607	Snx20	3.29	0.0172
23912	Rhof	3.29	0.0219
72333	Palld	3.29	0.0136
170722	Nxf7	3.29	0.0278
433771	Minos1	3.29	0.0195
65107	Lrp10	3.29	0.0344
54710	Hs3st3b1	3.29	0.0315
53897	Gal3st1	3.29	0.0324
211924	Dsg1c	3.29	0.0145
76025	Cant1	3.29	0.014
77040	Atg16l1	3.29	0.0207
22375	Wars	3.28	0.0136
66805	Tspan1	3.28	0.0166
20975	Synj2	3.28	0.0135
67630	Samd8	3.28	0.018
18791	Plat	3.28	0.02
93692	Glrx	3.28	0.0262
64435	Fcamr	3.28	0.0273
72042	Cotl1	3.28	0.0239
65255	Asb4	3.28	0.0138
66443	Tnfaip8l1	3.27	0.0145
110172	Slc35b1	3.27	0.0172
18453	P4hb	3.27	0.0186
13385	Dlg4	3.27	0.0138
238405	Adam6b	3.27	0.0228
100502723	Tsga8	3.26	0.0251
19737	Rgs5	3.26	0.0166
19736	Rgs4	3.26	0.0145
54384	Mtmr7	3.26	0.0191
68279	Mcoln2	3.26	0.0158
58193	Extl2	3.26	0.0173
12614	Celsr1	3.26	0.0165
20296	Ccl2	3.26	0.0159
78801	Ak7	3.26	0.0272
11514	Adcy8	3.26	0.02
12751	Tpp1	3.25	0.0151
109205	Sobp	3.25	0.0143
227659	Slc2a6	3.25	0.0144
67554	Slc25a30	3.25	0.0279
93701	Pcdhgb4	3.25	0.034
18102	Nme1	3.25	0.0166
18081	Ninj1	3.25	0.0145
11811	Apobec2	3.25	0.0144
20473	Six3	3.24	0.0168
258612	Olfr303	3.24	0.0323
23959	Nt5e	3.24	0.0367
100504591	Gm15987	3.24	0.0224
94219	Cnnm2	3.24	0.0183
22722	Zfp64	3.23	0.0374
69742	Tm2d2	3.23	0.0148
20768	Sephs2	3.23	0.0172
19124	Procr	3.23	0.0212
105348	Golm1	3.23	0.0153
74591	Abca12	3.23	0.0245
382062	AB124611	3.23	0.0178
12442	Ccnb2	3.22	0.0148
12075	Bfsp1	3.22	0.0338
68854	Asb11	3.22	0.0154
17025	Alad	3.22	0.0193
272382	Spib	3.21	0.0162
65221	Slc15a3	3.21	0.016
19301	Pxmp2	3.21	0.0152
279706	Nup62cl	3.21	0.0299
64095	Gpr35	3.21	0.0177
435653	Fcrlb	3.21	0.0299
52793	Fam3b	3.21	0.0233
20540	Slc7a7	3.2	0.0152
68611	Mrpl28	3.2	0.0319
381792	2310040G24Rik	3.2	0.0196
170745	Xpnpep2	3.19	0.0284
320534	Tmem104	3.19	0.0226
110880	Scn4a	3.19	0.0155
15251	Hif1a	3.19	0.019
653016	Gm7325	3.19	0.0166
80909	Gatsl2	3.19	0.0277
60527	Fads3	3.19	0.0155
14004	Chchd2	3.19	0.0156
12181	Bop1	3.19	0.0282
69459	Ubl7	3.18	0.0196
74062	Speer8-ps1	3.18	0.0216
64706	Scube1	3.18	0.017
236899	Pcyt1b	3.18	0.0248
26395	Map2k1	3.18	0.0236
69161	Manbal	3.18	0.0415
16398	Itga2	3.18	0.019
29815	Bcar3	3.18	0.0187
74777	Sepn1	3.17	0.0163
239336	Rxfp3	3.17	0.026
101497	Plekhg2	3.17	0.0269
212123	Dcaf15	3.17	0.0305
74020	Cpne4	3.17	0.0213
69780	Smap2	3.16	0.0173
328381	Sh2d4b	3.16	0.0286
242285	Sdr16c5	3.16	0.0291
19182	Psmc3	3.16	0.0172
140795	P2ry14	3.16	0.016
18406	Orm2	3.16	0.0167
18194	Nsdhl	3.16	0.0227
100302688	Gm17455	3.16	0.0231
70383	Cox10	3.16	0.0202
67855	Asprv1	3.16	0.017
20402	Zfp106	3.15	0.0166
103743	Tmem98	3.15	0.0241
69195	Tmem121	3.15	0.0395
22073	Prss3	3.15	0.0205
84095	Pi4k2a	3.15	0.0182
59092	Pcbp4	3.15	0.0176
194126	Mtmr11	3.15	0.0203
207683	Igsf11	3.15	0.0161
26918	Ern2	3.15	0.0414
12705	Cited1	3.15	0.0163
225608	Sh3tc2	3.14	0.0196
68565	Mrps18a	3.14	0.0362
735257	Mir467b	3.14	0.0165
67803	Limd2	3.14	0.0198
71393	Kctd6	3.14	0.0172
16504	Kcnc3	3.14	0.0306
15374	Hn1	3.14	0.022
246048	Chodl	3.14	0.0164
21346	Tagln2	3.13	0.0234
231571	Rpap2	3.13	0.0176
259033	Olfr1122	3.13	0.0328
230890	Gm436	3.13	0.0178
434869	Gm15097	3.13	0.0225
80752	Fam20c	3.13	0.0238
110355	Adrbk1	3.13	0.0205
66201	Vta1	3.12	0.0218
245828	Trappc1	3.12	0.0233
21908	Tlx1	3.12	0.0172
73658	Spns1	3.12	0.0257
18641	Pfkl	3.12	0.0258
70645	Oip5	3.12	0.0235
16885	Limk1	3.12	0.0168
110310	Krt7	3.12	0.017
171283	Havcr1	3.12	0.0239
20708	Serpinb6b	3.11	0.0287
53357	Pla2g6	3.11	0.0172
66569	Gdpd1	3.11	0.0304
72007	Fndc3b	3.11	0.0208
229499	Fcrl1	3.11	0.0278
14061	F2	3.11	0.0268
12386	Ctnna2	3.11	0.0172
545428	Ccdc141	3.11	0.0208
30948	Bin1	3.11	0.0177
11973	Atp6v1e1	3.11	0.0174
56228	Ube2j1	3.1	0.0241
20442	St3gal1	3.1	0.0173
18507	Pax5	3.1	0.0175
18146	Npdc1	3.1	0.0357
68499	Mrpl53	3.1	0.0327
30853	Mlf2	3.1	0.0173
66667	Hspbap1	3.1	0.0181
215654	Cdh12	3.1	0.0188
73481	1700074P13Rik	3.1	0.0195
231834	Snx8	3.09	0.0221
74137	Nuak2	3.09	0.0185
52120	Hgsnat	3.09	0.0218
228482	Arhgap11a	3.09	0.0424
64833	Acot10	3.09	0.0206
432479	4930404N11Rik	3.09	0.0206
52712	Zkscan6	3.08	0.0319
67701	Wfdc2	3.08	0.0179
21982	Tmem165	3.08	0.0184
209837	Slc38a5	3.08	0.0216
16889	Lipa	3.08	0.0326
63953	Dusp10	3.08	0.0179
75942	4930584F24Rik	3.08	0.0181
20209	Saa2	3.07	0.0181
19015	Ppard	3.07	0.0193
108797	Mex3b	3.07	0.0299
209737	Kif15	3.07	0.0438
71712	Dram1	3.07	0.0181
13014	Cstb	3.07	0.0255
69156	Comtd1	3.07	0.0192
12555	Cdh15	3.07	0.0409
226777	C130074G19Rik	3.07	0.0419
20878	Aurka	3.07	0.018
22596	Xrcc5	3.06	0.0188
70560	Wars2	3.06	0.0262
72098	Tmem68	3.06	0.0215
76072	Rnf183	3.06	0.025
104458	Rars	3.06	0.0192
80294	Pofut2	3.06	0.0189
216856	Nlgn2	3.06	0.0263
16190	Il4ra	3.06	0.0183
239420	Csmd3	3.06	0.0277
26366	Ceacam10	3.06	0.0315
67126	Atp5e	3.06	0.0437
216869	Arrb2	3.06	0.0184
433470	AA467197	3.06	0.0187
104732	4930427A07Rik	3.06	0.0287
76900	Ssbp4	3.05	0.0226
19072	Prep	3.05	0.0208
258921	Olfr1188	3.05	0.0283
17210	Mcl1	3.05	0.0249
14289	Fpr2	3.05	0.024
71990	Ddx54	3.05	0.0213
12925	Crip1	3.05	0.0234
625018	C4a	3.05	0.019
546144	Wdr72	3.04	0.0303
219151	Scara3	3.04	0.0204
384997	Pglyrp4	3.04	0.021
18008	Nes	3.04	0.0208
78052	Tmem190	3.03	0.0201
258313	Olfr726	3.03	0.0194
56441	Nat6	3.03	0.0216
17308	Mgat1	3.03	0.0215
14423	Galnt1	3.03	0.0263
14128	Fcer2a	3.03	0.0292
22271	Upp1	3.02	0.0241
30051	Spdef	3.02	0.0201
140743	Rem2	3.02	0.0195
71602	Myo1e	3.02	0.02
234199	Fgl1	3.02	0.0294
13542	Dvl1	3.02	0.0262
209195	Clic6	3.02	0.042
69863	Ttc39b	3.01	0.0201
55983	Pdzrn3	3.01	0.0235
59287	Ncstn	3.01	0.0279
56047	Msln	3.01	0.0424
333088	Kcp	3.01	0.0197
100041480	Gm9833	3.01	0.0349
99326	Garnl3	3.01	0.0245
14155	Fem1b	3.01	0.0293
319859	E030011O05Rik	3.01	0.0238
66642	Ctnnbl1	3.01	0.0412
381410	Zfp408	3	0.0206
319520	Dusp4	3	0.0212
68553	Col6a4	3	0.0293
208092	Chmp6	3	0.0229
329547	Bpi	3	0.0406
225884	BC021614	3	0.0382
70962	4922502N22Rik	3	0.0318
79202	Tnfrsf22	2.99	0.0211
109054	Pfdn4	2.99	0.0247
66916	Ndufb7	2.99	0.0221
17219	Mcm6	2.99	0.0211
68888	Gkn3	2.99	0.0304
71183	Clec12b	2.99	0.0485
19698	Relb	2.98	0.0261
53902	Rcan3	2.98	0.0209
66997	Psmd12	2.98	0.0378
320024	Nceh1	2.98	0.0242
15353	Hmg20b	2.98	0.0227
74427	Eaf1	2.98	0.0345
21929	Tnfaip3	2.97	0.0226
386612	Thoc6	2.97	0.0301
80976	Syt13	2.97	0.022
20482	Skil	2.97	0.0296
66681	Pgm1	2.97	0.0225
74309	Osbp2	2.97	0.0493
100503085	Klhl3	2.97	0.0265
227671	Gbgt1	2.97	0.0262
58233	Dnaja4	2.97	0.026
13056	Cyb561	2.97	0.0249
12368	Casp6	2.97	0.0356
11550	Adra1d	2.97	0.0213
381816	4922502D21Rik	2.97	0.0209
217369	Uts2r	2.96	0.0231
76561	Snx7	2.96	0.0236
80879	Slc16a3	2.96	0.0213
18132	Notch4	2.96	0.0212
18034	Nfkb2	2.96	0.0269
118453	Mmp28	2.96	0.0241
53859	Map3k14	2.96	0.0226
210146	Irgq	2.96	0.0224
14663	Glycam1	2.96	0.0362
382864	Colq	2.96	0.0214
51800	Bok	2.96	0.0236
22177	Tyrobp	2.95	0.0272
54397	Ppt2	2.95	0.0228
320452	P4ha3	2.95	0.0223
16412	Itgb1	2.95	0.0235
16174	Il18rap	2.95	0.0214
100043037	Gm10666	2.95	0.0216
53618	Fut8	2.95	0.0324
231600	Chfr	2.95	0.0231
70021	Nt5dc2	2.94	0.0315
27395	Mrpl15	2.94	0.0448
16835	Ldlr	2.94	0.0228
16534	Kcnn4	2.94	0.048
17713	Grpel1	2.94	0.0451
100038689	Gm10421	2.94	0.0229
320873	Cdh10	2.94	0.0216
56745	C1qtnf1	2.94	0.0268
11489	Adam12	2.94	0.0399
99382	Abtb2	2.94	0.0222
71106	4933413J09Rik	2.94	0.0396
21769	Zfand3	2.93	0.024
71998	Slc25a35	2.93	0.0222
20343	Sell	2.93	0.0233
20200	S100a6	2.93	0.0227
233489	Picalm	2.93	0.0279
252868	Odf4	2.93	0.0234
72900	Ndufv2	2.93	0.0257
100316693	Mir1938	2.93	0.0273
223604	Kcnk9	2.93	0.0224
16365	Irg1	2.93	0.0253
16165	Il13ra2	2.93	0.0373
15486	Hsd17b2	2.93	0.0312
59290	Gpa33	2.93	0.046
100038392	Gm10785	2.93	0.0464
260299	Cadm4	2.93	0.0291
381524	AI427809	2.93	0.0422
74530	9030612E09Rik	2.93	0.0318
77034	2510039O18Rik	2.93	0.0301
22137	Ttk	2.92	0.0229
22032	Traf4	2.92	0.0254
20868	Stk10	2.92	0.0271
68867	Rnf122	2.92	0.0349
108841	Rdh13	2.92	0.0289
277010	Marveld1	2.92	0.0225
434440	Fbxw20	2.92	0.0259
12183	Bpgm	2.92	0.0248
107747	Aldh1l1	2.92	0.0433
69944	2810021J22Rik	2.92	0.0406
67966	Zcchc10	2.91	0.0244
279572	Tlr13	2.91	0.0231
223809	Smgc	2.91	0.0427
93884	Pcdhb13	2.91	0.0453
50918	Myadm	2.91	0.0449
723926	Mir25	2.91	0.0242
105785	Kdelr3	2.91	0.0237
219148	Fam167a	2.91	0.0287
13122	Cyp7a1	2.91	0.0228
229613	6330549D23Rik	2.91	0.035
226841	Vash2	2.9	0.0235
76650	Srxn1	2.9	0.0301
20750	Spp1	2.9	0.0252
20523	Slc25a14	2.9	0.0249
230766	Fam167b	2.9	0.0405
140703	Emid1	2.9	0.023
114255	Dok4	2.9	0.0393
192662	Arhgdia	2.9	0.0231
68262	Agpat4	2.9	0.0249
319998	Tmem198	2.89	0.0249
22042	Tfrc	2.89	0.0335
94249	Slc24a3	2.89	0.0241
258480	Olfr130	2.89	0.04
446099	Nlrp4e	2.89	0.0235
74287	Kcmf1	2.89	0.0254
228801	Bpifb1	2.89	0.0255
56068	Ammecr1	2.89	0.0359
70730	6330409D20Rik	2.89	0.0239
52076	Tmem38b	2.88	0.0248
20963	Syk	2.88	0.0284
212108	Rln3	2.88	0.0399
19192	Psme3	2.88	0.0341
26561	Mmp23	2.88	0.0273
50772	Mapk6	2.88	0.0282
16159	Il12a	2.88	0.027
14058	F10	2.88	0.0242
13478	Dpagt1	2.88	0.0237
227333	Dgkd	2.88	0.0293
12767	Cxcr4	2.88	0.0239
54130	Actr1a	2.88	0.0241
66525	Timm50	2.87	0.0274
319317	Snhg11	2.87	0.0262
104215	Rhoq	2.87	0.024
18624	Pepd	2.87	0.0266
18611	Pea15a	2.87	0.0247
71844	Nupl1	2.87	0.0315
16859	Lgals9	2.87	0.0246
54645	Gripap1	2.87	0.0257
14068	F7	2.87	0.0254
433375	Creg1	2.87	0.0334
53374	Chst3	2.87	0.0281
98388	Chst10	2.87	0.0343
102448	Xylb	2.86	0.0269
22320	Vamp8	2.86	0.0244
22154	Tubb5	2.86	0.0304
64655	Mrps22	2.86	0.0273
384009	Glipr2	2.86	0.0285
104418	Dgkz	2.86	0.035
66102	Cxcl16	2.86	0.0284
67512	Agpat2	2.86	0.0243
20907	Stx1a	2.85	0.0326
234857	Spire2	2.85	0.0271
17913	Myo1c	2.85	0.0337
109129	Mmadhc	2.85	0.025
230815	Man1c1	2.85	0.0388
17096	Lyn	2.85	0.0424
330902	Gm16853	2.85	0.0276
192176	Flna	2.85	0.025
14161	Fga	2.85	0.0444
269037	Ctif	2.85	0.026
12334	Capn2	2.85	0.0274
108153	Adamts7	2.85	0.0251
11433	Acp5	2.85	0.0278
109335	9230102K24Rik	2.85	0.0436
22323	Vasp	2.84	0.0262
58865	Tdh	2.84	0.0324
104681	Slc16a6	2.84	0.0382
70325	Pigw	2.84	0.0408
17392	Mmp3	2.84	0.0275
381270	2017-03-04	2.84	0.0407
100043946	Gm14635	2.84	0.0251
217122	Gm11545	2.84	0.0398
13057	Cyba	2.84	0.027
12850	Coq7	2.84	0.025
66456	2810001G20Rik	2.84	0.0252
21366	Slc6a6	2.83	0.0318
231238	Sel1l3	2.83	0.0421
229877	Rap1gds1	2.83	0.0255
19730	Ralgds	2.83	0.0259
18609	Pdx1	2.83	0.0257
75678	Ippk	2.83	0.0314
71878	Fam83d	2.83	0.0254
20877	Aurkb	2.83	0.0297
224530	Acat3	2.83	0.042
170750	Xpnpep1	2.82	0.0259
20524	Slc25a17	2.82	0.0304
380713	Scarf1	2.82	0.0378
16434	Itpa	2.82	0.0259
100039222	Gm2109	2.82	0.0262
12813	Col10a1	2.82	0.0306
14570	Arhgdig	2.82	0.0347
71345	Ano9	2.82	0.0467
381411	Accsl	2.82	0.0262
233437	Vmn2r66	2.81	0.0279
22187	Ubb	2.81	0.0288
276891	Timd4	2.81	0.0288
21803	Tgfb1	2.81	0.0341
68981	Snrpa1	2.81	0.0446
100303751	Snora31	2.81	0.0311
20597	Smpd1	2.81	0.0335
17127	Smad3	2.81	0.0306
226971	Plekhb2	2.81	0.0265
83435	Plekha3	2.81	0.027
83431	Ndel1	2.81	0.0314
14325	Ftl1	2.81	0.0299
66930	Fank1	2.81	0.0297
68087	Dcakd	2.81	0.0262
12827	Col4a2	2.81	0.0278
12814	Col11a1	2.81	0.0263
213012	Abhd10	2.81	0.033
353310	Zfp703	2.8	0.0309
21985	Tpd52	2.8	0.0441
30059	Timm10	2.8	0.0337
18478	Pah	2.8	0.0427
258757	Olfr1013	2.8	0.0346
24070	Mpdu1	2.8	0.0297
14675	Gna14	2.8	0.0393
269713	Clip2	2.8	0.0479
20308	Ccl9	2.8	0.0294
227290	Aamp	2.8	0.0265
70120	Yars2	2.79	0.0341
54473	Tollip	2.79	0.0349
243958	Siglecg	2.79	0.0268
14916	Guca2b	2.79	0.0444
11871	Art2a-ps	2.79	0.034
11771	Ap2a1	2.79	0.0294
216859	Acap1	2.79	0.0303
74426	4933402D24Rik	2.79	0.0273
100043051	Vmn1r149	2.78	0.0333
51789	Tnk2	2.78	0.0296
70556	Slc25a33	2.78	0.0284
380702	Shisa6	2.78	0.0274
53858	Rwdd2b	2.78	0.0437
12795	Plk3	2.78	0.0392
18186	Nrp1	2.78	0.0394
14943	Gzmf	2.78	0.0272
432649	Gm5434	2.78	0.035
66498	Dda1	2.78	0.0297
110749	Chaf1b	2.78	0.0275
12483	Cd22	2.78	0.0285
26360	Angptl2	2.78	0.0296
319929	A630076J17Rik	2.78	0.0396
71687	Tmem25	2.77	0.028
58205	Pdcd1lg2	2.77	0.0341
258621	Olfr344	2.77	0.0408
110173	Manba	2.77	0.0382
381059	Gm1604b	2.77	0.0336
327762	Dna2	2.77	0.0473
12236	Bub1b	2.77	0.0276
208154	Btla	2.77	0.028
545477	Bpifa6	2.77	0.0301
73302	1700031M16Rik	2.77	0.0449
22789	Zp3r	2.76	0.028
21942	Tnfrsf9	2.76	0.0347
216225	Slc5a8	2.76	0.0431
20511	Slc1a2	2.76	0.0411
20361	Sema7a	2.76	0.0293
78891	Scyl1	2.76	0.028
56088	Psmg1	2.76	0.032
677296	Fcrl6	2.76	0.0409
14043	Ext2	2.76	0.0408
77590	Chst15	2.76	0.0334
237988	Cdr2l	2.76	0.0296
12508	Cd53	2.76	0.0281
23833	Cd52	2.76	0.0342
66757	Adat2	2.76	0.0304
108899	2700081O15Rik	2.76	0.0468
69101	Ydjc	2.75	0.0287
544806	Tmem92	2.75	0.0357
66413	Psmd6	2.75	0.0393
19177	Psmb7	2.75	0.0314
50706	Postn	2.75	0.0298
18703	Pigr	2.75	0.0353
100628611	Mir5107	2.75	0.0392
50797	Copb2	2.75	0.0296
17474	Clec4d	2.75	0.0345
140904	Caln1	2.75	0.0319
12263	C2	2.75	0.0298
100504399	C130021I20Rik	2.75	0.0336
320982	Arl4c	2.75	0.029
234734	Aars	2.75	0.037
23999	Twf2	2.74	0.0324
116873	Stim2	2.74	0.0305
18822	Plod1	2.74	0.0291
71648	Optn	2.74	0.0316
433702	Ncbp1	2.74	0.0436
16994	Ltb	2.74	0.029
73804	Kif2c	2.74	0.0313
103978	Gpc5	2.74	0.0338
14347	Fut7	2.74	0.0348
26380	Esrrb	2.74	0.0433
238988	Erc2	2.74	0.0344
54419	Cldn6	2.74	0.03
12534	Cdk1	2.74	0.0315
73505	1700072O05Rik	2.74	0.0384
19824	Trim10	2.73	0.0327
73166	Tm7sf2	2.73	0.0344
229277	Stoml3	2.73	0.0425
20704	Serpina1e	2.73	0.0301
228765	Sdcbp2	2.73	0.037
68816	Ppil1	2.73	0.0418
16870	Lhx2	2.73	0.039
235086	Igsf9b	2.73	0.0304
13511	Dsg2	2.73	0.0341
216820	Dhrs7b	2.73	0.0356
215418	Csrnp1	2.73	0.0297
71045	4933406I18Rik	2.73	0.0299
228775	Trib3	2.72	0.0425
217353	Tmc6	2.72	0.0408
20788	Srebf2	2.72	0.0367
20515	Slc20a1	2.72	0.0374
23917	Impdh1	2.72	0.03
241639	Fermt1	2.72	0.0306
56279	Fam69b	2.72	0.0398
12826	Col4a1	2.72	0.036
54411	Atp6ap1	2.72	0.0441
68796	Tmem214	2.71	0.0304
56322	Timm22	2.71	0.0309
19275	Ptprn	2.71	0.0325
382139	Gm1715	2.71	0.0311
234967	Slc36a4	2.7	0.0349
11853	Rhoc	2.7	0.031
66491	Polr2l	2.7	0.0314
319622	Itpripl2	2.7	0.0356
109229	Fam118b	2.7	0.0493
223593	E430025E21Rik	2.7	0.0333
56447	Copz1	2.7	0.0464
380785	Begain	2.7	0.0315
100043902	Six3os1	2.69	0.034
23996	Psmc4	2.69	0.0423
67963	Npc2	2.69	0.0317
268783	Mtmr12	2.69	0.0312
17207	Mcf2l	2.69	0.0312
66240	Kcne1l	2.69	0.0314
16416	Itgb3	2.69	0.031
77767	Ermn	2.69	0.0495
26427	Creb3l1	2.69	0.0331
217305	Cd300ld	2.69	0.0313
105518	A630023A22Rik	2.69	0.0309
69055	1810007D17Rik	2.69	0.0417
226351	Tmem185b	2.68	0.032
268297	Scml4	2.68	0.0354
259110	Olfr980	2.68	0.0354
236690	Nyx	2.68	0.0468
76483	Lmf1	2.68	0.0376
15183	Hdac3	2.68	0.0317
14239	Foxs1	2.68	0.0362
71405	Fam83c	2.68	0.0322
22341	Vegfc	2.67	0.0364
210027	Slc35f3	2.67	0.0332
223881	Rnd1	2.67	0.034
19225	Ptgs2	2.67	0.0321
15370	Nr4a1	2.67	0.0323
71893	Noxo1	2.67	0.0387
621580	Gm13308	2.67	0.0356
14131	Fcgr3	2.67	0.0321
12984	Csf2rb2	2.67	0.0342
18636	Cfp	2.67	0.0411
54218	B3galt4	2.67	0.0369
11843	Arf4	2.67	0.0393
66740	4931417E11Rik	2.67	0.0319
12401	Serpina6	2.66	0.0363
545279	Ms4a15	2.66	0.0328
226778	Mark1	2.66	0.0342
56702	Hist1h1b	2.66	0.0346
100502920	Gm16998	2.66	0.0473
12581	Cdkn2d	2.66	0.0493
70025	Acot7	2.66	0.0327
76792	2410131K14Rik	2.66	0.0354
21753	Tes	2.65	0.0393
546546	Serpina3h	2.65	0.038
64143	Ralb	2.65	0.0334
19084	Prkar1a	2.65	0.0448
66973	Mrps18b	2.65	0.0367
68537	Mrpl13	2.65	0.0341
319187	Hist1h2bn	2.65	0.0496
100689703	9330133O14Rik	2.65	0.0418
68054	Serpina12	2.64	0.047
71240	Osbpl7	2.64	0.0415
16706	Ksr1	2.64	0.0351
56489	Ikbke	2.64	0.0385
54426	Hgfac	2.64	0.0404
100039319	Gm14920	2.64	0.0365
14791	Emg1	2.64	0.0414
71544	Arhgap42	2.64	0.0336
212168	Zswim4	2.63	0.0437
56491	Vapb	2.63	0.0449
68066	Slc25a39	2.63	0.0338
243910	Nfkbid	2.63	0.0358
66108	Ndufa9	2.63	0.0376
54392	Ncapg	2.63	0.044
219135	Mtmr6	2.63	0.0424
27393	Mrpl39	2.63	0.0399
100526510	Mir3107	2.63	0.0359
240879	Mettl11b	2.63	0.0459
15490	Hsd17b7	2.63	0.0445
23892	Grem1	2.63	0.0412
68526	Gpr155	2.63	0.0342
230587	Glis1	2.63	0.046
230935	Dnajc11	2.63	0.0366
67373	2210010C04Rik	2.63	0.0441
72056	1810055G02Rik	2.63	0.0361
217154	Stac2	2.62	0.0363
226844	Mfsd7b	2.62	0.0345
66725	Lrrk2	2.62	0.0412
12835	Col6a3	2.62	0.0374
23991	Cib1	2.62	0.0487
12927	Bcar1	2.62	0.0347
320273	B230208H11Rik	2.62	0.0351
192200	Wfdc12	2.61	0.0354
72572	Spats2	2.61	0.0351
30054	Rnf17	2.61	0.0349
17925	Myo9b	2.61	0.0357
100504404	H2-Ea-ps	2.61	0.0353
12478	Cd19	2.61	0.0353
70970	4931419H13Rik	2.61	0.0373
627110	Tubb2a-ps2	2.6	0.0352
22145	Tuba4a	2.6	0.0487
13123	Cyp7b1	2.6	0.0464
11790	Speg	2.59	0.0364
19088	Prkar2b	2.59	0.0385
18786	Plaa	2.59	0.0488
17183	Matn4	2.59	0.0405
16975	Lrp8	2.59	0.0434
17826	Fam89b	2.59	0.0476
13070	Cyp11a1	2.59	0.0362
214685	Chadl	2.59	0.0405
58188	Vstm2b	2.58	0.0373
71733	Susd2	2.58	0.0448
56470	Rgs19	2.58	0.0421
228812	Pigu	2.58	0.0383
57080	Gtf2ird1	2.58	0.0446
68857	Dtwd2	2.58	0.0392
69668	Ccdc115	2.58	0.0418
11601	Angpt2	2.58	0.0368
11430	Acox1	2.58	0.0367
11428	Aco1	2.58	0.0395
100040049	1810010D01Rik	2.58	0.0384
21926	Tnf	2.57	0.0424
272009	Srsf12	2.57	0.0452
263876	Spata2	2.57	0.0402
76167	Snrnp35	2.57	0.0394
109270	Prr5	2.57	0.0427
57749	Piwil1	2.57	0.0378
73162	Otud3	2.57	0.0421
353328	Muc6	2.57	0.0397
17002	Ltf	2.57	0.0469
77809	Lrrc42	2.57	0.0389
242707	Lactbl1	2.57	0.0392
16800	Arhgef2	2.57	0.0388
22273	Uqcrc1	2.56	0.0445
213989	Tmem82	2.56	0.0421
75627	Snapc1	2.56	0.0395
80859	Nfkbiz	2.56	0.0377
16907	Lmnb2	2.56	0.0394
15002	H2-Ob	2.56	0.0377
14841	Gsg2	2.56	0.0437
69640	Fam83g	2.56	0.0464
69501	Etd	2.56	0.0483
378700	Bpifb3	2.56	0.0426
100504166	4933421O10Rik	2.56	0.0375
72607	Usp13	2.55	0.0383
320554	Tcp11l1	2.55	0.044
98366	Smap1	2.55	0.0496
628900	Serpina3i	2.55	0.0486
170729	Scrt1	2.55	0.0446
93699	Pcdhgb1	2.55	0.038
404327	Olfr1113	2.55	0.039
241528	Lrrc55	2.55	0.0395
65972	Ifi30	2.55	0.0381
15894	Icam1	2.55	0.044
15891	Ibsp	2.55	0.0451
319177	Hist1h2ba	2.55	0.0386
623781	Gm14137	2.55	0.0406
12338	Capn6	2.55	0.0498
66533	2310050C09Rik	2.55	0.0391
72277	1700030F18Rik	2.55	0.0488
171230	Vmn1r231	2.54	0.0457
64652	Nisch	2.54	0.042
244049	Mctp2	2.54	0.046
72844	Kctd17	2.54	0.0434
16181	Il1rn	2.54	0.0389
50527	Ero1l	2.54	0.048
76884	Cyfip2	2.54	0.0413
78617	Cstad	2.54	0.039
100039060	0610010B08Rik	2.54	0.0414
100043057	Tmem207	2.53	0.0442
227696	Phyhd1	2.53	0.0451
15980	Ifngr2	2.53	0.0391
15223	Foxj1	2.53	0.0435
329693	Fcrl5	2.53	0.0472
12861	Cox6a1	2.53	0.0428
20219	Apcs	2.53	0.0427
11639	Ak4	2.53	0.0469
381404	Pabpc1l	2.52	0.0485
17168	Nprl3	2.52	0.0409
235712	Mrgpra2b	2.52	0.0401
14635	Galk1	2.52	0.0448
58217	Trem1	2.51	0.0404
232086	Tmem150a	2.51	0.0458
215210	Tmem120a	2.51	0.0418
20460	Stil	2.51	0.0404
20465	Sim2	2.51	0.0496
19127	Prop1	2.51	0.0404
18099	Nlk	2.51	0.0435
67602	Necap1	2.51	0.041
73390	Msl3l2	2.51	0.0446
381452	Gm1647	2.51	0.0454
270049	Galntl6	2.51	0.0476
623046	Fscb	2.51	0.0427
17151	Ccndbp1	2.51	0.0436
76457	Ccdc134	2.51	0.0407
12291	Cacna1g	2.51	0.0407
319247	9530080O11Rik	2.51	0.0427
252905	Vmn1r72	2.5	0.041
22346	Vhl	2.5	0.0409
245195	Retnlg	2.5	0.0426
18648	Pgam1	2.5	0.0457
76574	Mfsd2a	2.5	0.0412
16979	Lrrn1	2.5	0.0429
269582	Clspn	2.5	0.0416
12566	Cdk2	2.5	0.0454
11602	Angpt4	2.5	0.0417
72240	1600014C23Rik	2.5	0.0415
56433	Vps29	2.49	0.0424
622222	Vmn1r175	2.49	0.045
70426	Tekt5	2.49	0.0419
56504	Srpk3	2.49	0.0459
68332	Sdhaf1	2.49	0.0491
66510	Rnf181	2.49	0.0466
329384	Ptrh1	2.49	0.0439
19231	Ptma	2.49	0.0479
50501	Prok2	2.49	0.0468
171580	Mical1	2.49	0.0468
16323	Inhba	2.49	0.0426
50497	Hspa14	2.49	0.0442
67839	Gpsm1	2.49	0.0429
14399	Gabra6	2.49	0.0423
432552	Fam71b	2.49	0.0429
414101	E130317F20Rik	2.49	0.0495
195208	Dcdc2a	2.49	0.0426
12321	Calu	2.49	0.0438
232358	Vmn2r19	2.48	0.0462
67151	Psmd9	2.48	0.0443
18729	Pira6	2.48	0.0472
216873	Spag7	2.47	0.0459
72076	Mospd4	2.47	0.0449
215257	Il1f9	2.47	0.0429
320975	D330050G23Rik	2.47	0.0427
171508	Creld1	2.47	0.0427
53418	B4galt2	2.47	0.0431
12549	Arhgap31	2.47	0.0479
242109	Zfp697	2.46	0.0474
320500	Tmem215	2.46	0.0448
20719	Serpinb6a	2.46	0.0442
20194	S100a10	2.46	0.0481
240168	Rasgrp3	2.46	0.0495
226646	Ndufs2	2.46	0.0442
16680	Krt84	2.46	0.0483
74470	Cep72	2.46	0.0497
68891	Cd177	2.46	0.0439
227210	Ccnyl1	2.46	0.0485
77983	B230119M05Rik	2.46	0.046
27279	Tnfrsf12a	2.45	0.0457
68828	Sync	2.45	0.0461
217340	Rnf157	2.45	0.0483
94045	P2rx5	2.45	0.0443
68323	Nudt22	2.45	0.0449
16774	Lama3	2.45	0.047
50794	Klf13	2.45	0.0491
15199	Hebp1	2.45	0.0446
66629	Golph3	2.45	0.048
52004	Cdk2ap2	2.45	0.0445
93961	B3galt5	2.45	0.0451
100041585	Amd2	2.45	0.0479
22324	Vav1	2.44	0.0475
26570	Slc7a11	2.44	0.045
211548	Nomo1	2.44	0.045
14940	Gzmc	2.44	0.0478
76969	Chst1	2.44	0.0494
74601	4833427F10Rik	2.44	0.0463
22371	Vwf	2.43	0.0459
23970	Pacsin2	2.43	0.0475
18413	Osm	2.43	0.0466
68033	Cox19	2.43	0.0483
72421	Ttc30b	2.42	0.0467
68718	Rnf166	2.42	0.0478
75646	Rai14	2.42	0.046
17279	Melk	2.42	0.0465
12296	Cacnb2	2.42	0.0467
12273	C5ar1	2.42	0.0465
27219	Sgk2	2.41	0.0481
59029	Psmd14	2.41	0.0474
240672	Dusp5	2.41	0.0474
665033	Col6a5	2.41	0.0487
664702	A530088E08Rik	2.41	0.0469
171233	Vmn1r235	2.4	0.0496
258353	Olfr521	2.4	0.0476
50529	Mrps7	2.4	0.0483
225030	Kcng3	2.4	0.0491
12447	Ccne1	2.4	0.0477
27368	Tbl2	2.39	0.0486
279499	Kctd19	2.39	0.0482
16403	Itga6	2.39	0.0486
72500	Ier5l	2.39	0.0479
56368	Cyb561d2	2.39	0.0482
73648	2410012E07Rik	2.39	0.0484
67057	Yaf2	2.38	0.0493
245126	Tarm1	2.38	0.0496
18575	Pde1c	2.38	0.0492
79410	Klra23	2.38	0.0495
258654	Olfr1135	2.37	0.0495
73690	Glipr1	2.37	0.0499
24127	Xrn1	-2.37	0.0497
19211	Pten	-2.37	0.0495
72175	Mfsd8	-2.37	0.0499
270118	Maml2	-2.37	0.0494
243574	Kbtbd8	-2.37	0.0498
320080	Zbtb39	-2.38	0.0493
68694	Lce1e	-2.38	0.0493
15429	Hoxd1	-2.38	0.0491
28135	Cep63	-2.38	0.0495
70920	4921511H03Rik	-2.38	0.0495
211652	Wwc1	-2.39	0.0487
53325	Banp	-2.39	0.0498
72895	Setd5	-2.4	0.0472
20277	Scnn1b	-2.4	0.0489
103135	Pan2	-2.4	0.048
26409	Map3k7	-2.4	0.0477
68094	Smarcc2	-2.41	0.0494
75387	Sirt4	-2.41	0.0491
258938	Olfr1417	-2.41	0.0495
52064	Coq5	-2.41	0.0494
216198	Tcp11l2	-2.42	0.0461
21340	Taf1b	-2.42	0.0497
231583	Slc26a1	-2.42	0.0492
100736249	Mira	-2.42	0.0465
219094	Khnyn	-2.42	0.0478
77644	C330007P06Rik	-2.42	0.0493
67378	Bbs2	-2.42	0.0478
230908	Tardbp	-2.43	0.0469
209086	Samd9l	-2.43	0.0471
100038914	Gm16387	-2.43	0.0454
50759	Fbxo16	-2.43	0.0456
330544	C230091D08Rik	-2.43	0.0482
209032	Zc3hav1l	-2.44	0.0498
22634	Plagl1	-2.44	0.0472
72567	Bclaf1	-2.44	0.0493
109979	Art3	-2.44	0.0498
360216	Zranb1	-2.45	0.0445
231668	Vsig10	-2.45	0.0459
19821	Rnf2	-2.45	0.0445
245945	Rbm47	-2.45	0.046
257891	Olfr479	-2.45	0.0448
268566	Gphn	-2.45	0.044
72584	Cul4b	-2.45	0.0445
77777	Ulbp1	-2.46	0.046
209456	Trp53bp2	-2.46	0.0479
208098	Panx3	-2.46	0.0452
723825	Mir103-2	-2.46	0.0451
23894	Gtf2h2	-2.46	0.0464
245050	Fam198a	-2.46	0.0447
54451	Cpsf3	-2.46	0.049
241066	Carf	-2.46	0.049
213990	Agap3	-2.46	0.0439
68738	Acss1	-2.46	0.0443
66190	Acer3	-2.46	0.048
22694	Zfp35	-2.47	0.0438
75553	Zc3h14	-2.47	0.0433
67725	Nudt13	-2.47	0.0431
18027	Nfia	-2.47	0.047
16173	Il18	-2.47	0.0434
208164	Fam180a	-2.47	0.0436
75567	1700027I24Rik	-2.47	0.0444
22648	Zfp11	-2.48	0.0434
209760	Tmc7	-2.48	0.0424
19202	Rhox6	-2.48	0.0428
16858	Lgals7	-2.48	0.0453
15492	Hsd3b1	-2.48	0.0497
68675	Fam172a	-2.48	0.0455
17470	Cd200	-2.48	0.0438
67382	Brd3	-2.48	0.0448
72993	Appl1	-2.48	0.0449
21855	Timm17b	-2.49	0.0456
56626	Poll	-2.49	0.0452
258158	Olfr169	-2.49	0.0432
100502936	E330021D16Rik	-2.49	0.0461
320256	Dlec1	-2.49	0.0418
12464	Cct4	-2.49	0.0492
108857	Ankhd1	-2.49	0.0424
269800	Zfp384	-2.5	0.0438
234740	Tmem231	-2.5	0.046
67249	Tbc1d19	-2.5	0.0457
240816	Rgsl1	-2.5	0.041
69693	Pof1b	-2.5	0.0409
16593	Klc1	-2.5	0.0489
320727	Ipo8	-2.5	0.0429
98488	Gtf3c3	-2.5	0.0429
381438	Gm5148	-2.5	0.0499
56278	Gkap1	-2.5	0.0479
665780	Zscan4b	-2.51	0.0407
71983	Tmco6	-2.51	0.0404
76582	Ipo11	-2.51	0.0411
14190	Fgl2	-2.51	0.041
110826	Etfb	-2.51	0.0485
13629	Eef2	-2.51	0.0443
67160	Eef1g	-2.51	0.0458
59288	Dctn5	-2.51	0.0413
67967	Pold3	-2.52	0.0397
216505	Pik3ip1	-2.52	0.0477
18142	Npas1	-2.52	0.0494
17775	Laptm4a	-2.52	0.044
16363	Irf2	-2.52	0.0428
227095	Hibch	-2.52	0.0447
208144	Dhx37	-2.52	0.0441
26378	Decr2	-2.52	0.0401
60599	Trp53inp1	-2.53	0.0417
108800	Ston2	-2.53	0.0434
241062	Pgap1	-2.53	0.0393
270669	Mbtps2	-2.53	0.0456
217335	Fbf1	-2.53	0.0393
80898	Erap1	-2.53	0.0421
99334	Zscan29	-2.54	0.0409
22764	Zfx	-2.54	0.0462
235469	Zfp280d	-2.54	0.0491
80902	Zfp202	-2.54	0.0393
67590	Tctn3	-2.54	0.0423
433700	Spag8	-2.54	0.0439
233532	Rsf1	-2.54	0.0401
320360	Ric3	-2.54	0.0451
75477	Pfn3	-2.54	0.0389
15552	Htr1d	-2.54	0.0442
14939	Gzmb	-2.54	0.0389
73707	Gucy2g	-2.54	0.0438
328186	Gm10336	-2.54	0.0385
23986	Eci2	-2.54	0.0403
76747	Dapl1	-2.54	0.0492
232983	Cxcl17	-2.54	0.0392
75784	1700007G11Rik	-2.54	0.0389
330502	Zfp82	-2.55	0.0429
75597	Ndufaf2	-2.55	0.0425
99470	Magi3	-2.55	0.0394
71038	4933401H06Rik	-2.55	0.0441
77652	Zfp955a	-2.56	0.0406
21646	Tcte2	-2.56	0.0474
68592	Syf2	-2.56	0.0492
76571	Styxl1	-2.56	0.0403
19017	Ppargc1a	-2.56	0.0387
27008	Micall1	-2.56	0.0395
217588	Mbip	-2.56	0.0496
68877	Maf1	-2.56	0.0445
319184	Hist1h2bk	-2.56	0.0389
629141	Gm9999	-2.56	0.0406
26554	Cul3	-2.56	0.0385
12380	Cast	-2.56	0.0386
71473	8430423G03Rik	-2.56	0.0493
230757	5730409E04Rik	-2.56	0.0397
277345	Wfdc16	-2.57	0.0466
73178	Wasl	-2.57	0.0427
74616	Scrn3	-2.57	0.0464
67891	Rpl4	-2.57	0.0447
67115	Rpl14	-2.57	0.0401
18356	Olfr56	-2.57	0.0494
101706	Numa1	-2.57	0.0382
18160	Npr1	-2.57	0.0375
100038347	Fam174b	-2.57	0.0371
245527	Eda2r	-2.57	0.0439
78725	D730001G18Rik	-2.57	0.039
225004	BC027072	-2.57	0.0415
100504663	Atg14	-2.57	0.0379
71837	1700003E16Rik	-2.57	0.0497
24064	Spry2	-2.58	0.0419
66568	Rwdd3	-2.58	0.037
19883	Rora	-2.58	0.0367
271457	Rab5a	-2.58	0.0452
227937	Pkp4	-2.58	0.0367
723843	Mir337	-2.58	0.0369
380928	Lmo7	-2.58	0.0421
230376	Haus6	-2.58	0.0365
13419	Dnase1	-2.58	0.0368
14025	Bcl11a	-2.58	0.0433
21685	Tef	-2.59	0.0406
269589	Sytl1	-2.59	0.0447
20537	Slc5a1	-2.59	0.0491
19951	Rpl32	-2.59	0.042
212627	Prpsap2	-2.59	0.0361
74203	Eif4enif1	-2.59	0.0429
232784	Zfp212	-2.6	0.0444
73884	Zdbf2	-2.6	0.0385
245695	Tceanc	-2.6	0.0387
94186	Strn3	-2.6	0.0385
19655	Rbmx	-2.6	0.0487
83486	Rbm5	-2.6	0.0453
106248	Qtrtd1	-2.6	0.0387
66194	Pycrl	-2.6	0.0361
213171	Prss27	-2.6	0.0397
228005	Ppig	-2.6	0.0463
404323	Olfr1040	-2.6	0.0418
735290	Mir706	-2.6	0.0362
68468	Ly6g6c	-2.6	0.0386
68917	Hint2	-2.6	0.0365
66482	Exoc2	-2.6	0.037
13819	Epas1	-2.6	0.0393
108112	Eif4ebp3	-2.6	0.0449
12359	Cat	-2.6	0.0493
11908	Atf1	-2.6	0.0364
100382	AW011738	-2.6	0.0495
319556	A330041J22Rik	-2.6	0.0359
229644	Trim45	-2.61	0.0481
50799	Slc25a13	-2.61	0.0351
243272	Sbno1	-2.61	0.0351
20104	Rps6	-2.61	0.0405
56698	Phax	-2.61	0.0351
67050	Nkap	-2.61	0.0353
229543	Ints3	-2.61	0.0389
329575	Gm14325	-2.61	0.0485
108150	Galnt7	-2.61	0.0491
626942	Vmn2r90	-2.62	0.0367
327942	Pigl	-2.62	0.0346
72117	Naa50	-2.62	0.0369
100039968	Gm12942	-2.62	0.0405
13709	Elf1	-2.62	0.0348
13631	Eef2k	-2.62	0.0349
329877	Dennd4c	-2.62	0.0396
12808	Cobl	-2.62	0.0369
76041	Ccdc125	-2.62	0.0416
77041	Arsk	-2.62	0.0349
22710	Zfp52	-2.63	0.0393
329795	Tmem67	-2.63	0.047
21830	Theg	-2.63	0.0446
21778	Tex9	-2.63	0.0351
20476	Six6	-2.63	0.034
74213	Rbm26	-2.63	0.0388
71323	Rassf8	-2.63	0.0351
66340	Psenen	-2.63	0.0349
74737	Pcf11	-2.63	0.045
170719	Oxr1	-2.63	0.0345
14870	Gstp1	-2.63	0.0456
14865	Gstm4	-2.63	0.0343
214321	Gm4787	-2.63	0.0347
100502987	Gm17066	-2.63	0.0491
70300	Fuz	-2.63	0.0352
14171	Fgf17	-2.63	0.0457
13560	E4f1	-2.63	0.0498
12364	Casp12	-2.63	0.0344
71213	Cage1	-2.63	0.0399
80288	Bcl9l	-2.63	0.0475
110616	Atxn3	-2.63	0.0366
68564	Nufip2	-2.64	0.0378
15382	Hnrnpa1	-2.64	0.0364
100271704	Gm17660	-2.64	0.0352
226151	Fam178a	-2.64	0.0429
319887	E030030I06Rik	-2.64	0.0351
192119	Dicer1	-2.64	0.0396
78937	Avl9	-2.64	0.0425
66400	Alkbh7	-2.64	0.0496
66169	Tomm7	-2.65	0.0336
56381	Spen	-2.65	0.0454
236727	Slc9a7	-2.65	0.0328
19684	Rdx	-2.65	0.0439
233210	Prr12	-2.65	0.0377
94353	Hmgn3	-2.65	0.0352
211556	Ap1ar	-2.65	0.0403
216835	Usp43	-2.66	0.0433
207214	Larp4	-2.66	0.0476
317653	Klk14	-2.66	0.048
230259	E130308A19Rik	-2.66	0.0401
13204	Dhx15	-2.66	0.0365
106877	Afap1l1	-2.66	0.0327
70675	Vcpip1	-2.67	0.0326
24113	Vax2	-2.67	0.0322
74413	Tc2n	-2.67	0.0325
231637	Ssh1	-2.67	0.0319
51796	Srrm1	-2.67	0.0328
19820	Rlim	-2.67	0.0329
18762	Prkcz	-2.67	0.0474
69871	Ppp1r35	-2.67	0.0356
60315	Myg1	-2.67	0.0477
387179	Mir184	-2.67	0.0395
330216	Mblac1	-2.67	0.0321
140577	Ankrd6	-2.67	0.0354
381067	Zfp229	-2.68	0.0498
54651	Usp27x	-2.68	0.0487
231861	Tnrc18	-2.68	0.0384
230405	Ifne	-2.68	0.04
108671	Dnajc9	-2.68	0.0372
66136	Znrd1	-2.69	0.0326
195434	Utp14b	-2.69	0.0344
21969	Top1	-2.69	0.0318
231769	Sfswap	-2.69	0.0359
71521	Pds5a	-2.69	0.0321
23955	Nek4	-2.69	0.0318
66897	Naa16	-2.69	0.0465
29808	Mga	-2.69	0.0315
210711	Mcmbp	-2.69	0.0315
15437	Hoxd8	-2.69	0.0436
231293	Cwh43	-2.69	0.0384
54422	Barhl1	-2.69	0.0318
245000	Atr	-2.69	0.0316
69499	Tsr2	-2.7	0.0316
21374	Tbp	-2.7	0.034
631002	Ssxb8	-2.7	0.0362
18024	Nfe2l2	-2.7	0.0319
320299	Iqcb1	-2.7	0.0392
68152	Fam133b	-2.7	0.0308
20148	Dhrs3	-2.7	0.0445
622665	Ccdc17	-2.7	0.0305
21411	Tcf20	-2.71	0.0317
229675	Rsbn1	-2.71	0.0319
223722	Mcat	-2.71	0.0425
51960	Kctd18	-2.71	0.0303
223272	Itgbl1	-2.71	0.0303
270004	Foxi2	-2.71	0.0342
56358	Copz2	-2.71	0.0337
100503592	A330076C08Rik	-2.71	0.0435
434325	Tmem221	-2.72	0.0306
11989	Slc7a3	-2.72	0.03
19672	Rcn1	-2.72	0.0298
319638	Nt5dc1	-2.72	0.0375
100637	N4bp2l1	-2.72	0.0304
16553	Kif13a	-2.72	0.0298
667213	Gm10416	-2.72	0.0391
71782	Ankle2	-2.72	0.0309
240613	9930021J03Rik	-2.72	0.0366
215693	Zmat1	-2.73	0.0455
56869	Zfp109	-2.73	0.0402
66816	Thap2	-2.73	0.0313
22782	Slc30a1	-2.73	0.034
19921	Rpl19	-2.73	0.0354
66849	Ppp1r2	-2.73	0.0494
110417	Pigh	-2.73	0.0299
52443	Mrpl48	-2.73	0.0378
107227	Macrod1	-2.73	0.0413
68695	Hddc3	-2.73	0.0309
12662	Chm	-2.73	0.0376
211389	Suox	-2.74	0.0298
236732	Rbm10	-2.74	0.0376
100628596	Mir5127	-2.74	0.0356
100040606	Gm2863	-2.74	0.0304
66784	Fam187a	-2.74	0.0322
78755	Fam122b	-2.74	0.0288
12891	Cpne6	-2.74	0.0389
69562	Cdk13	-2.74	0.0394
12537	Cdk11b	-2.74	0.0311
382423	Atxn7l3b	-2.74	0.0483
76967	2700049A03Rik	-2.74	0.0359
544752	Tug1	-2.75	0.0315
69276	Sec62	-2.75	0.0385
319207	Pgbd1	-2.75	0.0347
69792	Med6	-2.75	0.0353
17118	Marcks	-2.75	0.0338
16196	Il7	-2.75	0.0329
110606	Fntb	-2.75	0.0463
67166	Arl8b	-2.75	0.0304
11685	Alox12e	-2.75	0.0381
69054	1810007C17Rik	-2.75	0.029
68238	1700123O21Rik	-2.75	0.0435
100121	Tdrd7	-2.76	0.0346
20181	Rxra	-2.76	0.0397
71340	Riok1	-2.76	0.0285
73724	Mcee	-2.76	0.0476
72039	Mccc1	-2.76	0.0319
319162	Hist3h2a	-2.76	0.0405
11694	Alx3	-2.76	0.028
77166	8030423J24Rik	-2.76	0.0437
68531	1110020A21Rik	-2.76	0.0291
51875	Tmem141	-2.77	0.0332
18569	Pdcd4	-2.77	0.0354
27400	Hsd17b6	-2.77	0.0435
22350	Ezr	-2.77	0.0277
13353	Dgcr6	-2.77	0.0394
218630	Ccno	-2.77	0.028
381077	Ccdc78	-2.77	0.0338
76742	Snx27	-2.78	0.0373
209588	Sectm1a	-2.78	0.0288
67427	Rps20	-2.78	0.0288
231440	Parm1	-2.78	0.0296
104130	Ndufb11	-2.78	0.0412
74665	Lrrc48	-2.78	0.0277
74782	Glt8d2	-2.78	0.0429
218629	Dhx29	-2.78	0.0279
229663	Csde1	-2.78	0.0407
78174	Cox7b2	-2.78	0.0346
71458	Bcor	-2.78	0.0278
214137	Arhgap29	-2.78	0.0304
22770	Zhx1	-2.79	0.0342
73729	Zfp383	-2.79	0.0441
68134	Upf3b	-2.79	0.0463
219022	Ttc5	-2.79	0.0339
93759	Sirt1	-2.79	0.0431
235626	Setd2	-2.79	0.0443
240614	Ranbp6	-2.79	0.0297
232970	Phldb3	-2.79	0.0436
23830	Capn10	-2.79	0.0288
232339	Ankrd26	-2.79	0.0469
216549	Aftph	-2.79	0.0269
80985	Trim44	-2.8	0.0384
216453	Rdh19	-2.8	0.0303
237082	Nxt2	-2.8	0.0311
59013	Hnrnph1	-2.8	0.0374
14616	Gja8	-2.8	0.0263
116940	Tgs1	-2.81	0.0326
192287	Slc25a36	-2.81	0.0461
19356	Rad17	-2.81	0.0302
28015	Polr2m	-2.81	0.0273
27386	Npas3	-2.81	0.0319
226098	Hectd2	-2.81	0.0335
64290	Foxb1	-2.81	0.0301
30795	Fkbp3	-2.81	0.0395
67117	Dynlt3	-2.81	0.0289
213575	Dync2li1	-2.81	0.0295
67171	Dram2	-2.81	0.0305
230996	9430015G10Rik	-2.81	0.0451
75812	Tasp1	-2.82	0.0293
74585	Sppl3	-2.82	0.0346
20674	Sox2	-2.82	0.0492
268301	Sowahc	-2.82	0.0288
227394	Slco4c1	-2.82	0.0329
218210	Nup153	-2.82	0.0284
76915	Mnd1	-2.82	0.0261
16911	Lmo4	-2.82	0.0408
319991	Kif6	-2.82	0.0332
66355	Gmpr	-2.82	0.0302
330385	9530026P05Rik	-2.82	0.0264
72813	2810454H06Rik	-2.82	0.026
68046	2700062C07Rik	-2.82	0.0446
76421	1700028K03Rik	-2.82	0.0404
77117	Zfp934	-2.83	0.0267
74352	Zfp84	-2.83	0.0427
22719	Zfp61	-2.83	0.0277
21834	Thrb	-2.83	0.0253
70099	Smc4	-2.83	0.0284
210148	Slc30a6	-2.83	0.0269
17688	Msh6	-2.83	0.0268
378435	Mafa	-2.83	0.0316
66540	Fam107b	-2.83	0.0378
78120	4930449E18Rik	-2.83	0.0291
83984	Tssk6	-2.84	0.0263
214804	Syde2	-2.84	0.0401
620235	Siglec15	-2.84	0.0392
66870	Serbp1	-2.84	0.0251
56353	Rybp	-2.84	0.025
67872	Nsmce4a	-2.84	0.0332
105853	Mal2	-2.84	0.025
15312	Hmgn1	-2.84	0.0333
76454	Fbxo31	-2.84	0.0256
16341	Eif3e	-2.84	0.0425
12450	Ccng1	-2.84	0.0256
234912	9230110C19Rik	-2.84	0.0256
228602	4930402H24Rik	-2.84	0.0254
74682	Wdr35	-2.85	0.0246
20687	Sp3	-2.85	0.0283
71706	Slc46a3	-2.85	0.0285
19331	Rab19	-2.85	0.0255
[truncated: 1,082 more rows]

## Sheet: NPp53 Abi vs NPp53 Veh
Dataset S1C: Differentially expressed genes between NPp53 abiraterone versus NPp53 vehicle (p<0.05)
Mouse entrez	Symbol	t-statistics	p-value
74477	4933427D14Rik	7.97	0.00069
71300	Rnf148	7.95	0.000324
258447	Olfr1241	7.2	0.00116
723962	Mir26a-2	7.04	0.00146
106389	Eaf2	6.93	0.00127
621893	Hist2h2ab	6.59	0.000589
14729	Gp5	6.18	0.00104
66043	Atp5d	6.08	0.00113
75951	4930578M01Rik	6.03	0.0187
18506	Pax4	5.97	0.000989
77733	Rnf170	5.96	0.00117
544881	BB287469	5.9	0.0101
668173	Pex10	5.76	0.00197
75007	Fam63a	5.66	0.00173
245847	Amdhd2	5.62	0.00386
67528	Nudt7	5.61	0.00458
225887	Ndufs8	5.46	0.0017
404316	Olfr403	5.44	0.00491
76308	Rab1b	5.31	0.00416
110959	Nudt19	5.29	0.00278
73463	Als2cr11	5.06	0.00438
252906	Vmn1r189	5.04	0.00235
73847	Fam110a	5.03	0.0227
11731	Ang2	5.01	0.00242
66199	Commd4	4.93	0.00504
192970	Dhrs11	4.86	0.00775
277668	Gm13088	4.85	0.00559
20931	Surf2	4.83	0.0141
219072	Haus4	4.8	0.0043
70920	4921511H03Rik	4.79	0.0252
67184	Ndufa13	4.77	0.00343
83409	Lamtor2	4.65	0.00898
52285	D6Ertd474e	4.65	0.00353
78914	Nadsyn1	4.59	0.00455
70003	1700028I16Rik	4.47	0.0411
208501	1810043H04Rik	4.44	0.0129
78797	Ndor1	4.42	0.00453
232943	Klc3	4.38	0.00555
258806	Olfr912	4.37	0.00649
29812	Ndrg3	4.37	0.00556
66400	Alkbh7	4.33	0.005
71820	Wdr34	4.32	0.00635
71971	Zswim1	4.31	0.00781
79044	Mrps34	4.31	0.00528
66366	Ergic3	4.3	0.00564
67163	Ccdc47	4.3	0.00509
13661	Ehf	4.29	0.00585
259104	Olfr613	4.27	0.00666
50884	Nckap1	4.27	0.0144
67337	Cstf1	4.27	0.0107
330173	2610524H06Rik	4.25	0.00596
78330	Ndufv3	4.23	0.012
211253	Mtrf1	4.22	0.00607
67549	Gpr89	4.21	0.00629
14598	Ggt1	4.21	0.00602
16204	Fabp6	4.19	0.0199
73526	Speer4b	4.17	0.007
20318	Sdf4	4.17	0.0066
22673	Zfp185	4.15	0.00919
235043	Tmem205	4.15	0.00782
229699	Slc16a4	4.15	0.00605
448850	Znhit3	4.13	0.00634
53322	Nucb2	4.13	0.0224
19305	Pex5	4.12	0.0127
432478	Tmprss9	4.11	0.0365
66286	Sec11c	4.1	0.00737
233071	Arhgap33	4.08	0.00987
100042964	Gm4133	4.07	0.0101
81630	Zbtb22	4.06	0.00679
76187	Adhfe1	4.06	0.00668
224585	Zfp160	4.05	0.0276
214917	Fam173a	4.05	0.0124
223978	Cpped1	4.05	0.00831
20944	Svs5	4.03	0.0131
68342	Ndufb10	4.01	0.00892
66084	Rmnd1	4	0.011
258959	Olfr170	4	0.0105
387176	Mir181a-2	4	0.00866
54447	Asah2	4	0.00874
13202	Ddt	3.99	0.0077
28199	Dcaf11	3.98	0.00733
112406	Egln2	3.94	0.00943
226970	Arhgef4	3.93	0.00804
68268	Zdhhc21	3.92	0.0141
380839	Serpinb1c	3.91	0.0142
100628613	Mir5119	3.91	0.0137
67945	Rpl41	3.89	0.00815
68375	Ndufa8	3.88	0.0117
622665	Ccdc17	3.87	0.00828
56327	Arl2	3.87	0.0117
259016	Olfr1048	3.86	0.0105
192140	Tmc2	3.85	0.0224
30805	Slc22a4	3.85	0.0111
381510	Dpy19l4	3.84	0.0179
72053	Tmub2	3.82	0.0185
269589	Sytl1	3.81	0.0154
109075	Exosc4	3.81	0.0126
381286	Serpinb3c	3.8	0.0141
100502921	Gm10142	3.8	0.0176
665775	Bod1l	3.8	0.0245
64656	Mrps23	3.79	0.00945
16601	Klf9	3.77	0.0168
11694	Alx3	3.76	0.0156
654467	Gm10052	3.75	0.0137
22122	Tsta3	3.74	0.0108
22062	Trp73	3.74	0.0146
64295	Tmub1	3.74	0.0123
67790	Rab39b	3.74	0.01
100039551	Tgif2lx2	3.72	0.0127
106707	Rpusd1	3.71	0.0157
12039	Bckdha	3.71	0.00998
69920	Polr2i	3.69	0.0237
70315	Hdac8	3.69	0.0136
140498	Rxfp2	3.68	0.011
66967	Edem3	3.68	0.0105
70055	1700030L20Rik	3.68	0.036
68982	1500015A07Rik	3.68	0.0103
50500	Ttpa	3.66	0.0106
66244	Nemf	3.66	0.0134
214580	Pstk	3.65	0.0114
107392	Brms1	3.65	0.0126
66349	Atp5sl	3.65	0.0118
108687	Edem2	3.63	0.0189
378462	Morn2	3.62	0.0225
100302432	Gm14435	3.62	0.0211
22320	Vamp8	3.61	0.0114
68563	Dpm3	3.61	0.0196
69659	2310069G16Rik	3.61	0.0157
68742	Tmem219	3.6	0.0146
387251	Mirlet7i	3.6	0.019
13177	Eci1	3.59	0.0483
53310	Dlg3	3.59	0.0115
268281	Shprh	3.58	0.0133
723848	Mir34a	3.58	0.0176
73062	Ppp1r16a	3.57	0.0425
68066	Slc25a39	3.56	0.0209
20441	St3gal3	3.55	0.0154
53868	Rab25	3.55	0.0121
68572	Ict1	3.55	0.0202
70274	Ly6g6e	3.54	0.0125
54197	Rnf5	3.53	0.0213
69707	Iqcg	3.53	0.0162
380608	Tagap1	3.52	0.0127
74075	Syce1	3.52	0.0265
74915	Atp6v1e2	3.52	0.0161
11768	Ap1m2	3.51	0.0162
75223	4930528D03Rik	3.51	0.0241
72252	1700022A21Rik	3.51	0.0223
279766	Rhbdd3	3.5	0.0322
66194	Pycrl	3.49	0.0238
240068	Zfp563	3.48	0.0174
22441	Xlr	3.48	0.0139
73754	Thap1	3.48	0.0198
14548	Mrps33	3.48	0.0134
207798	Gramd1c	3.48	0.0134
64244	Snord116l1	3.47	0.0132
217201	Rundc1	3.46	0.0227
69572	Mfsd3	3.46	0.0297
12739	Cldn3	3.46	0.0149
234290	BC030500	3.46	0.0161
66757	Adat2	3.46	0.0152
213272	Txndc2	3.45	0.0203
320506	Lmbrd2	3.45	0.0141
71149	4933413G19Rik	3.45	0.0144
22770	Zhx1	3.44	0.0159
78830	Slc25a12	3.44	0.0167
209186	Acnat2	3.44	0.0166
73598	1700001O22Rik	3.44	0.0237
101023	Zfp513	3.43	0.0253
11757	Prdx3	3.43	0.0209
22225	Usp5	3.42	0.0174
56424	Stub1	3.42	0.0459
72836	Pot1b	3.42	0.0186
227683	Coq4	3.42	0.0261
68260	Trmt12	3.41	0.0146
19099	Mapk8ip1	3.4	0.0147
242409	Tmem8b	3.39	0.015
93715	Pcdhga7	3.39	0.0324
110821	Pcca	3.39	0.0156
326622	Upf2	3.38	0.025
15013	H2-Q2	3.38	0.023
20356	Sema5a	3.37	0.023
19988	Rpl6	3.37	0.0151
100126776	Esp24	3.37	0.0209
56350	Arl3	3.37	0.017
22417	Wnt4	3.36	0.0154
59005	Trappc2l	3.36	0.0269
17939	Naga	3.36	0.0187
14377	G6pc	3.36	0.0255
74245	Ctbs	3.35	0.047
66170	Chchd5	3.35	0.0477
100039641	E330012B07Rik	3.34	0.0207
11909	Atf2	3.34	0.0157
22273	Uqcrc1	3.33	0.0169
20872	Stk16	3.33	0.0209
22289	Kdm6a	3.33	0.0165
108958	Fam73b	3.33	0.0173
100756	Usp30	3.32	0.0172
387245	Mirlet7b	3.32	0.0219
68307	Lrriq4	3.32	0.016
67638	4930483J18Rik	3.32	0.0261
66387	Nudt8	3.31	0.0198
75739	Mpp7	3.31	0.0188
320924	Ccbe1	3.3	0.0276
212569	Zfp273	3.29	0.0211
71810	Ranbp3	3.29	0.0246
72029	Cnpy3	3.29	0.0167
56369	Apip	3.29	0.0257
19687	Rfc1	3.28	0.0258
12339	Capn7	3.28	0.0197
69010	Anapc13	3.28	0.0188
20972	Syngr1	3.27	0.0256
78239	Spint4	3.27	0.0175
100042840	Gm16501	3.27	0.0235
545551	BC021767	3.26	0.0253
192113	Atp12a	3.26	0.0173
67317	1700022I11Rik	3.26	0.0205
195434	Utp14b	3.25	0.0195
18618	Pemt	3.25	0.0425
100040531	Dynlt1f	3.25	0.0375
21452	Tcn2	3.24	0.0279
71361	Aifm2	3.24	0.0202
212439	AA986860	3.23	0.0179
66445	Cyc1	3.22	0.0182
68789	Trmt61b	3.21	0.0313
56335	Mettl3	3.21	0.0267
214505	Gnptg	3.21	0.0255
224761	H2-M10.5	3.2	0.047
76899	Golga1	3.2	0.0205
619321	9530052E02Rik	3.2	0.0234
112408	Tas2r116	3.19	0.0207
268480	Rapgefl1	3.19	0.0239
73490	Mipol1	3.19	0.0216
66153	Fbxo36	3.19	0.019
13171	Dbt	3.19	0.0254
246703	Apoa1bp	3.19	0.0218
67028	2610002M06Rik	3.19	0.0331
22719	Zfp61	3.17	0.0192
75089	Uhrf1bp1l	3.17	0.0201
74087	Slc7a13	3.17	0.0267
100043686	Amy2a3	3.17	0.0249
66144	Atp6v1f	3.16	0.0267
258853	Olfr982	3.15	0.0198
30949	Lcmt1	3.15	0.0238
245944	Vps54	3.13	0.0319
28105	Trim36	3.13	0.0256
258203	Olfr1178	3.13	0.0214
230316	Megf9	3.13	0.0208
191578	Helq	3.13	0.032
381337	Fam178b	3.13	0.0457
72518	2610307P16Rik	3.13	0.0244
73348	1700045H11Rik	3.13	0.0397
194433	Olfr707	3.12	0.0258
74253	Klrg2	3.12	0.0228
110826	Etfb	3.12	0.0214
235050	Zfp810	3.11	0.0247
13603	Opn3	3.11	0.0269
277743	Fam131c	3.11	0.0215
214531	Tmprss13	3.1	0.0251
67264	Ndufb8	3.1	0.0212
100043239	Gm4307	3.1	0.0219
14705	Bscl2	3.1	0.0211
68721	1110032A03Rik	3.1	0.023
71837	1700003E16Rik	3.09	0.022
71640	Zfp949	3.08	0.0252
224691	Zfp472	3.08	0.0227
215859	Taar8a	3.08	0.0229
244891	Scaper	3.08	0.0312
67442	Retsat	3.08	0.0279
76282	Gpt	3.08	0.0316
629159	1700008J07Rik	3.08	0.0243
171272	Vmn1r219	3.07	0.0353
24100	Tpra1	3.07	0.0422
224624	Rab40c	3.07	0.0461
15064	Mr1	3.07	0.0224
625249	Gpx4	3.07	0.0251
211945	Plekhh1	3.06	0.0234
19684	Rdx	3.05	0.0257
67418	Ppil4	3.05	0.0269
70974	Pgm2l1	3.05	0.0258
258368	Olfr1450	3.05	0.0265
259068	Olfr1390	3.05	0.0227
107971	Frs3	3.05	0.0349
234725	Zfp612	3.04	0.0314
404473	Olfr1082	3.04	0.0274
210535	Gm12169	3.04	0.0287
66126	Elof1	3.04	0.0229
12040	Bckdhb	3.04	0.0232
73910	Arhgap18	3.04	0.0232
22661	Zfp148	3.03	0.0412
108682	Gpt2	3.03	0.0289
404194	Gfral	3.03	0.0288
216350	Tspan8	3.02	0.0234
56389	Stx5a	3.02	0.0261
69051	Pycr2	3.02	0.0332
19213	Ptf1a	3.02	0.0488
66268	Pigyl	3.02	0.0278
57320	Park7	3.02	0.0276
70266	Ccbl1	3.02	0.0361
22693	Zfp30	3.01	0.0245
66706	Ndufaf3	3.01	0.0237
69367	Glrx2	3.01	0.0274
240613	9930021J03Rik	3.01	0.0241
319224	6330410L21Rik	3.01	0.0366
259018	Olfr1049	3	0.0353
26557	Homer2	3	0.0246
13800	Enah	3	0.024
56495	Asna1	3	0.0334
223754	Tbc1d22a	2.99	0.0292
52898	Rnasek	2.99	0.0321
214742	Rcor3	2.99	0.0464
224938	Pja2	2.99	0.0253
67466	Pdcl	2.99	0.0247
331392	Gm5124	2.99	0.0286
208292	Zfp871	2.98	0.0259
380705	Tmem102	2.98	0.0257
234964	Ccdc67	2.98	0.0348
79043	Spsb3	2.97	0.0305
76560	Prss8	2.97	0.026
18632	Pex11b	2.97	0.0256
12070	Ngfrap1	2.97	0.0439
723816	Mir130b	2.97	0.0417
229279	Hnrnpa3	2.97	0.0261
209462	Hace1	2.97	0.0292
66446	Exosc7	2.97	0.0283
71743	Coasy	2.97	0.0341
216454	BC089597	2.97	0.0358
67188	2700046G09Rik	2.97	0.0256
381107	Tmem232	2.96	0.0255
68634	Tm2d3	2.96	0.0255
237749	Gm4926	2.96	0.0331
58909	Fam13a	2.96	0.0282
12283	Cab39	2.96	0.0255
66869	Zfp869	2.95	0.0311
11720	Mat1a	2.95	0.0473
13835	Epha1	2.95	0.0385
66724	Tab3	2.94	0.0277
100628597	Mir5128	2.94	0.0265
319556	A330041J22Rik	2.94	0.0314
226115	Opalin	2.93	0.0338
259082	Olfr1062	2.93	0.028
17192	Mbd3	2.93	0.0271
268498	E030025P04Rik	2.93	0.0284
28135	Cep63	2.93	0.0264
51897	Atg13	2.93	0.0289
14479	Usp15	2.92	0.0394
69384	Tmem89	2.92	0.038
54215	Cd160	2.92	0.0267
66089	Rmnd5b	2.91	0.027
18312	Olfr15	2.91	0.0275
68531	1110020A21Rik	2.91	0.0273
22710	Zfp52	2.9	0.0466
83925	Trps1	2.9	0.0273
14184	Fgfr3	2.9	0.0378
193838	Eme2	2.9	0.0288
108989	Tpr	2.89	0.0402
100217462	Snord92	2.89	0.03
20400	Sh2d1a	2.89	0.0283
19074	Prg2	2.89	0.0367
100043061	Gm4201	2.89	0.0318
432479	4930404N11Rik	2.89	0.0361
76804	Kdm4c	2.88	0.0307
73916	Ift57	2.88	0.0464
108946	Zzz3	2.87	0.0283
69207	Srsf11	2.87	0.0289
20817	Srpk2	2.87	0.0302
232232	Hdac11	2.87	0.0445
70508	Bbx	2.87	0.0314
73867	4930428E07Rik	2.87	0.0421
236193	Zfp709	2.86	0.0383
72881	Zdhhc4	2.86	0.041
20813	Srp14	2.85	0.034
233532	Rsf1	2.85	0.0406
56535	Pex3	2.85	0.0371
258671	Olfr826	2.85	0.0304
66627	Ogfod2	2.85	0.0392
66416	Ndufa7	2.85	0.0408
14792	Lpcat3	2.85	0.0401
14872	Gstt2	2.85	0.0301
100303732	Gm14431	2.85	0.0297
628422	Vmn2r58	2.84	0.0312
66171	Pgls	2.84	0.0385
114643	Oas1c	2.84	0.0457
66972	Slc25a23	2.83	0.0316
258277	Olfr281	2.83	0.0321
257935	Olfr1287	2.83	0.0334
723922	Mir466	2.83	0.0328
75946	4930583P06Rik	2.83	0.0486
70393	2210416O15Rik	2.83	0.0352
100316831	Mir669h	2.82	0.0494
394430	Ugt1a10	2.81	0.0332
67249	Tbc1d19	2.81	0.0462
18046	Nfyc	2.81	0.0439
14824	Grn	2.81	0.0312
66958	Tmx2	2.8	0.0317
228012	Tlk1	2.8	0.0378
20892	Stra13	2.8	0.0338
80828	Snord82	2.8	0.0362
56210	Rev1	2.8	0.0326
72287	Plekhf1	2.8	0.0316
66923	Pbrm1	2.8	0.0344
224480	Nox3	2.8	0.0318
639025	Gm7257	2.8	0.0339
620417	Gm6150	2.8	0.0366
100504235	Gm20125	2.8	0.0338
67117	Dynlt3	2.8	0.0422
52397	Zfp644	2.79	0.0323
258381	Olfr460	2.79	0.0489
54713	Fezf2	2.79	0.0346
109299	C330006A16Rik	2.79	0.0363
73480	1700074H08Rik	2.79	0.0347
68708	Rabl2	2.78	0.0346
19175	Psmb6	2.78	0.0435
56032	Nprl2	2.78	0.0336
16783	Lamp1	2.78	0.0403
67458	Ergic1	2.78	0.0495
72180	Zfp661	2.77	0.0386
68090	Yif1a	2.77	0.034
213575	Dync2li1	2.77	0.0427
69654	Dctn2	2.77	0.0454
56443	Arpc1a	2.77	0.0326
320631	Abca15	2.77	0.0405
232078	Thnsl2	2.76	0.0339
19725	Rfx2	2.76	0.0351
19714	Rev3l	2.76	0.0357
18087	Nktr	2.76	0.0328
17380	Mme	2.76	0.0364
16529	Kcnk5	2.76	0.0337
320191	Hook3	2.76	0.0391
72748	Hdhd3	2.76	0.0357
245502	Gm41	2.76	0.0403
57837	Eral1	2.76	0.0335
230259	E130308A19Rik	2.76	0.0345
54420	Cldn8	2.76	0.0402
12662	Chm	2.76	0.033
57810	Cdon	2.76	0.0329
224727	Bag6	2.76	0.0445
244486	Adam29	2.76	0.0329
735268	Mir680-1	2.75	0.0386
233833	Tnrc6a	2.74	0.0341
99887	Tmem56	2.74	0.0367
269643	Ppp2r2c	2.74	0.0344
11425	Apoc4	2.74	0.0348
66108	Ndufa9	2.73	0.0393
320051	Exph5	2.73	0.044
75425	Tti1	2.72	0.0361
17293	Mesp2	2.72	0.0381
234684	Lrrc29	2.72	0.0431
14871	Gstt1	2.72	0.0362
67171	Dram2	2.72	0.0418
100126824	Sco2	2.71	0.0351
216505	Pik3ip1	2.71	0.036
116871	Mta3	2.71	0.0467
68421	Lmbrd1	2.71	0.0368
235634	Gm590	2.71	0.0351
71367	Chst9	2.71	0.045
192657	Ell2	2.7	0.0377
66098	Chchd6	2.7	0.0438
11593	Aga	2.7	0.0419
170938	Zfp617	2.69	0.0362
68556	Uckl1	2.69	0.0401
22287	Scgb1a1	2.69	0.0448
258258	Olfr1308	2.69	0.0366
723968	Mir9-3	2.69	0.0377
60367	Il1rapl2	2.69	0.0376
109754	Cyb5r3	2.69	0.0454
75786	Ckap5	2.69	0.0361
79560	Ublcp1	2.68	0.0409
215335	Slc36a1	2.68	0.0438
235626	Setd2	2.68	0.0404
18807	Pld3	2.68	0.0475
16424	Itih1	2.68	0.0456
23857	Dmtf1	2.68	0.0385
380694	Ccnjl	2.68	0.0489
66690	Tmem186	2.67	0.0452
93696	Chrac1	2.67	0.0369
434437	Amt	2.67	0.0371
22117	Tst	2.66	0.0428
237091	Lhfpl1	2.66	0.0403
13648	Klk1b9	2.66	0.0383
15484	Hsd11b2	2.66	0.0375
14403	Gabrd	2.66	0.0495
14183	Fgfr2	2.66	0.0378
321008	6330408A02Rik	2.66	0.0377
329065	Scd4	2.65	0.0441
258019	Olfr212	2.65	0.0446
15211	Hexa	2.65	0.0392
229227	4932438A13Rik	2.65	0.0391
240066	Zfp870	2.64	0.0456
381802	Tsen2	2.64	0.0474
18569	Pdcd4	2.64	0.0469
74205	Acsl3	2.64	0.0407
69661	2310061N02Rik	2.64	0.039
66241	Tmem9	2.63	0.0391
245583	Tgif2lx1	2.63	0.0431
192163	Pcdha3	2.63	0.0476
17449	Mdh1	2.63	0.0437
100126269	BC048602	2.63	0.0435
329165	Abi2	2.63	0.0489
75269	4930564D02Rik	2.63	0.0395
380967	Tmem106c	2.62	0.0425
68385	Tlcd1	2.62	0.0418
13608	Edar	2.62	0.0429
22248	Unc119	2.61	0.0404
382985	Rrm2b	2.61	0.0453
84113	Ptov1	2.61	0.041
18261	Ocm	2.61	0.0437
100124496	Mir743b	2.61	0.0456
21410	Hnf1b	2.61	0.0456
12971	Crym	2.61	0.042
12460	Ccs	2.61	0.0412
73363	1700056E22Rik	2.61	0.0419
387150	Mir132	2.6	0.0409
100502917	Gm12130	2.6	0.0459
57869	Adck2	2.6	0.0474
22648	Zfp11	2.59	0.0427
21888	Tle4	2.59	0.0414
14693	Gnb2	2.59	0.0431
75406	Ndufs7	2.58	0.0489
244713	Zfp317	2.57	0.0428
99138	Stard7	2.57	0.0429
20014	Rpn2	2.57	0.0468
231044	Gbx1	2.57	0.0431
50911	Exosc9	2.57	0.0431
26367	Ceacam2	2.57	0.0424
269016	Sh3rf2	2.56	0.0432
19216	Ptger1	2.56	0.0443
64144	Mllt1	2.56	0.0468
17069	Ly6e	2.56	0.0426
219181	Akap11	2.56	0.0446
57438	2016-03-07	2.55	0.0451
243312	Elfn1	2.55	0.0474
664724	Cypt9	2.55	0.044
11920	Atm	2.55	0.0448
73845	Ankrd42	2.55	0.0478
67862	2310033P09Rik	2.55	0.0473
22377	Wbp1	2.54	0.0454
18536	Pcm1	2.54	0.0442
75641	1700029I15Rik	2.53	0.0464
66745	Trpd52l3	2.52	0.0454
27096	Trappc3	2.52	0.0484
68401	G6pc3	2.52	0.0455
69225	Carkd	2.52	0.0463
384185	Arl9	2.52	0.0457
546157	7420426K07Rik	2.52	0.0451
277692	Rps19-ps3	2.5	0.0472
243084	Tmprss11e	2.49	0.0479
236794	Slc9a6	2.49	0.047
26415	Mapk13	2.49	0.0473
16573	Kif5b	2.49	0.0499
23877	Fiz1	2.49	0.0475
140740	Sec63	2.48	0.048
18313	Olfr16	2.48	0.049
328949	Mcc	2.48	0.049
93747	Echs1	2.46	0.0498
232217	4933427D06Rik	2.45	0.0498
329918	Skint9	-2.46	0.0494
77286	Nkrf	-2.46	0.0491
12723	Clcn1	-2.47	0.0492
100038595	Gm16287	-2.48	0.0499
14201	Fhl3	-2.48	0.0488
69729	2410003L11Rik	-2.48	0.0483
272382	Spib	-2.49	0.0482
19208	Ptcra	-2.49	0.0489
14472	Gbx2	-2.49	0.0496
73856	4930428G15Rik	-2.49	0.0475
75140	Slxl1	-2.5	0.0488
18263	Odc1	-2.5	0.0499
72640	Mex3a	-2.5	0.047
67732	Iah1	-2.5	0.0482
225995	D030056L22Rik	-2.5	0.0497
68048	Aen	-2.5	0.0472
11516	Adcyap1	-2.5	0.0476
16801	Arhgef1	-2.51	0.0469
18764	Pkd2	-2.52	0.0498
18037	Nfkbie	-2.52	0.0474
11447	Chrnd	-2.52	0.0455
74277	Chic2	-2.52	0.0458
54519	Apbb1ip	-2.52	0.0487
75370	4930563E18Rik	-2.52	0.0483
240069	Morc2b	-2.53	0.0478
17287	Mep1a	-2.53	0.0465
225659	Cep76	-2.53	0.0472
24066	Spry4	-2.54	0.0473
74761	Mxra8	-2.54	0.0458
22379	Fmnl3	-2.54	0.0491
56275	Rbm14	-2.55	0.0449
16170	Il16	-2.55	0.0435
234878	BC021891	-2.56	0.0499
74712	4930511A02Rik	-2.56	0.0426
100043757	Zfp831	-2.57	0.0426
109042	Prkcdbp	-2.57	0.0426
74116	Pi16	-2.57	0.0482
17242	Mdk	-2.57	0.0466
15483	Hsd11b1	-2.57	0.0463
14573	Gdnf	-2.57	0.0478
230734	Yrdc	-2.58	0.0431
244061	Gm4971	-2.58	0.0436
72088	Ush1c	-2.59	0.0414
110109	Nop2	-2.59	0.0418
100526525	Mir3092	-2.59	0.0464
16199	Il9r	-2.59	0.0455
319157	Hist1h4f	-2.59	0.0472
22312	Vmn2r107	-2.6	0.0407
240725	Sulf1	-2.6	0.046
74732	Stx11	-2.6	0.0409
74441	Slco6c1	-2.6	0.045
209773	Dennd2a	-2.6	0.0419
74117	Actr3	-2.6	0.0423
258491	Olfr490	-2.61	0.0453
665389	Gm7616	-2.61	0.0416
100042275	Gm3763	-2.61	0.0405
75796	Cdyl2	-2.61	0.0405
71803	Slc25a18	-2.62	0.0487
19731	Rgl1	-2.62	0.0464
18810	Plec	-2.62	0.0439
27984	Efhd2	-2.62	0.0459
11514	Adcy8	-2.62	0.0408
22156	Tuft1	-2.63	0.0444
19892	Rpe65	-2.63	0.0491
320502	Lmod3	-2.63	0.0476
17137	Magea1	-2.64	0.0407
259300	Ehd2	-2.64	0.0394
19229	Ptk2b	-2.65	0.0401
18771	Pknox1	-2.65	0.0379
217648	Gm527	-2.65	0.0396
68040	Zfp593	-2.66	0.0375
16923	Sh2b3	-2.66	0.0451
19366	Rad54l	-2.66	0.0495
258291	Olfr1167	-2.66	0.0383
244745	Dpy19l1	-2.66	0.0499
56773	Chst5	-2.66	0.0466
69538	Antxr1	-2.66	0.0484
735266	Mir592	-2.67	0.0479
15002	H2-Ob	-2.67	0.0436
100041952	Gm15315	-2.67	0.044
237988	Cdr2l	-2.67	0.0372
73321	1700042O10Rik	-2.67	0.0374
217333	Trim47	-2.68	0.0425
215436	Slc35e3	-2.68	0.0399
212108	Rln3	-2.68	0.0378
66491	Polr2l	-2.68	0.0386
100042342	Gm10375	-2.68	0.0368
14128	Fcer2a	-2.68	0.0491
107753	Lgals2	-2.69	0.0417
545817	Cyp2w1	-2.69	0.0368
381411	Accsl	-2.69	0.0439
22171	Tyms	-2.7	0.0457
80976	Syt13	-2.7	0.0363
20538	Slc6a2	-2.7	0.0373
93883	Pcdhb12	-2.7	0.0376
194357	Moxd2	-2.7	0.0358
723918	Mir547	-2.7	0.0356
16202	Ilk	-2.7	0.0449
13123	Cyp7b1	-2.7	0.0357
259161	Olfr688	-2.71	0.0447
18812	Prl2c3	-2.72	0.0393
67557	Larp6	-2.72	0.0359
215114	Hip1	-2.72	0.0477
100037278	Fam129c	-2.72	0.0406
68724	Arl8a	-2.72	0.035
210417	Thsd7b	-2.73	0.0467
18370	Olfr69	-2.73	0.0427
387199	Mir203	-2.73	0.0465
26951	Zw10	-2.74	0.0342
70397	Tmem70	-2.74	0.0427
19112	Prl8a6	-2.74	0.0452
268490	Lsm12	-2.74	0.0499
100087	Kti12	-2.74	0.0337
606496	Gsk3a	-2.74	0.0443
14239	Foxs1	-2.74	0.035
14202	Fhl4	-2.74	0.0375
12817	Col13a1	-2.74	0.0448
74178	Stk40	-2.75	0.0358
217340	Rnf157	-2.75	0.0463
19700	Rem1	-2.75	0.0345
723912	Mir382	-2.75	0.0448
53608	Map3k6	-2.75	0.0426
76987	Hdhd2	-2.75	0.0348
50909	C1ra	-2.75	0.0334
100303646	AF357355	-2.75	0.0386
53311	Mybph	-2.76	0.0351
16443	Itsn1	-2.76	0.0342
100233208	Gm10778	-2.76	0.033
12054	Bcl7b	-2.76	0.034
233887	Zfp553	-2.77	0.0483
69136	Tusc1	-2.77	0.0363
100526473	Mir3071	-2.77	0.0498
16012	Igfbp6	-2.77	0.044
14179	Fgf8	-2.77	0.0426
407814	BC053393	-2.77	0.0376
71918	Zcchc24	-2.78	0.0356
108114	Slc22a7	-2.78	0.0416
20005	Rpl9	-2.78	0.0353
16183	Il2	-2.79	0.0335
636104	Gm7173	-2.79	0.0389
12798	Cnn2	-2.79	0.0352
67628	Anp32b	-2.79	0.0462
319477	6030419C18Rik	-2.79	0.0321
75507	Pou5f2	-2.8	0.0353
258737	Olfr1316	-2.8	0.0379
17210	Mcl1	-2.8	0.0345
17147	Mageb3	-2.8	0.0405
238205	Lrfn5	-2.8	0.0351
75753	Klf17	-2.8	0.044
71957	Cpsf3l	-2.8	0.0421
21859	Timp3	-2.81	0.0314
18720	Pip5k1a	-2.81	0.04
234404	Nxnl1	-2.81	0.033
735264	Mir671	-2.81	0.0411
13647	Egfbp2	-2.81	0.0315
71241	Dmrtc2	-2.81	0.036
73438	1700061F12Rik	-2.81	0.0311
326623	Tnfsf15	-2.82	0.0339
328594	D630010B17Rik	-2.82	0.0462
66780	4933436I01Rik	-2.82	0.0359
16898	Rps2	-2.83	0.0466
384783	Irs2	-2.83	0.0299
433638	I830077J02Rik	-2.83	0.0404
235415	Cplx3	-2.83	0.0358
76793	Snip1	-2.84	0.0448
17836	Mug1	-2.84	0.0319
269994	Gsg1l	-2.84	0.0305
67531	5730408K05Rik	-2.85	0.0487
78025	4930540M03Rik	-2.85	0.0377
214616	Spata5l1	-2.86	0.0301
17313	Mgp	-2.86	0.0369
50523	Lats2	-2.86	0.0298
70435	Inf2	-2.86	0.0382
14065	F2rl3	-2.86	0.043
26360	Angptl2	-2.86	0.037
109054	Pfdn4	-2.87	0.0285
381678	Zcwpw1	-2.88	0.0295
67158	Sft2d3	-2.88	0.0491
114886	Cygb	-2.88	0.0367
12518	Cd79a	-2.88	0.0361
76589	Unc5cl	-2.89	0.0367
66406	Sac3d1	-2.89	0.0427
68028	Rpl22l1	-2.89	0.0336
60365	Rbm8a	-2.89	0.0275
106512	Gpsm3	-2.89	0.0279
56693	Crtap	-2.89	0.0315
72151	Rfc5	-2.9	0.0482
71314	4933433F19Rik	-2.9	0.0299
22166	Txn1	-2.91	0.0404
100689	Spon2	-2.91	0.0329
104369	Snora69	-2.91	0.0349
56086	Set	-2.91	0.0336
74069	Serpina3a	-2.91	0.0292
18491	Pappa	-2.91	0.0302
66377	Ndufc1	-2.91	0.0417
320014	B930025P03Rik	-2.91	0.0285
239618	Pdzrn4	-2.92	0.0321
100043247	Gm4312	-2.92	0.0283
245282	Apol10a	-2.92	0.0271
320770	A630072M18Rik	-2.92	0.0266
171429	Slc26a6	-2.93	0.0263
226849	Ppp2r5a	-2.93	0.0412
77579	Myh10	-2.93	0.032
56184	Msgn1	-2.93	0.0379
13684	Eif4e	-2.93	0.0263
18094	Nkx2-9	-2.94	0.035
12608	Cebpb	-2.94	0.0258
74854	4930402F06Rik	-2.95	0.0334
66817	Tmem170	-2.96	0.0254
80889	Mesdc1	-2.96	0.0254
97908	Hist1h3g	-2.96	0.0257
100529079	5830418P13Rik	-2.96	0.0281
67568	Mrfap1	-2.97	0.0299
21417	Zeb1	-2.98	0.0403
98258	Txndc9	-2.98	0.0257
242509	Bnc2	-2.98	0.0246
11461	Actb	-2.98	0.0258
72098	Tmem68	-2.99	0.0343
16000	Igf1	-2.99	0.0339
23888	Gpc6	-2.99	0.026
276829	Smtnl2	-3	0.0252
243958	Siglecg	-3	0.03
109232	Sccpdh	-3	0.0277
214854	Neurl3	-3	0.0257
72500	Ier5l	-3	0.0339
80838	Hist1h1a	-3	0.0264
72393	Faim2	-3	0.0245
72205	Eml2	-3	0.0335
330004	Gm833	-3.01	0.0246
27041	G3bp1	-3.01	0.0328
72002	Slc39a5	-3.02	0.0387
432763	Prr7	-3.02	0.0262
17285	Meox1	-3.02	0.0415
228564	Frmd5	-3.02	0.0236
72043	Sulf2	-3.03	0.0273
20440	St6gal1	-3.03	0.0355
399101	Snhg3	-3.03	0.0269
16706	Ksr1	-3.03	0.0361
70118	Srrd	-3.04	0.0252
53892	Ppm1d	-3.04	0.0273
258151	Olfr1505	-3.04	0.0231
16598	Klf2	-3.04	0.0236
435376	Atp6ap1l	-3.04	0.0305
22368	Trpv2	-3.05	0.034
76938	Rbm17	-3.05	0.0234
230721	Pabpc4	-3.05	0.0238
21788	Tfpi	-3.06	0.0232
100628605	Mir5136	-3.06	0.0329
108960	Irak2	-3.06	0.031
100041787	Gm15292	-3.06	0.0222
100504285	Abhd12b	-3.06	0.0248
20657	Sod3	-3.07	0.022
72429	Dnajc25	-3.07	0.0285
72504	Taf4b	-3.08	0.0233
245865	Spag4	-3.08	0.0217
242316	Gdf6	-3.08	0.0366
19370	Raet1c	-3.09	0.0215
100040268	Olfr157	-3.09	0.0233
170643	Kirrel	-3.09	0.0219
19335	Rab23	-3.1	0.0227
72899	Macrod2	-3.1	0.0282
66725	Lrrk2	-3.1	0.0211
625585	Gm6602	-3.1	0.0211
234577	Cpne2	-3.1	0.0225
68911	Pygo2	-3.11	0.0215
110511	Olfr153	-3.11	0.0313
66276	1810009A15Rik	-3.11	0.029
104370	Snora68	-3.12	0.0246
381714	Gm9758	-3.12	0.0273
382243	Gm10439	-3.12	0.0232
74229	Paqr8	-3.13	0.0204
18054	Ngp	-3.13	0.0255
12482	Ms4a1	-3.13	0.0461
210992	Lpcat1	-3.13	0.024
18974	Pole2	-3.14	0.0377
107770	Tm6sf2	-3.15	0.0307
56014	Olfr70	-3.15	0.0232
21809	Tgfb3	-3.16	0.0332
100043194	Sult2a2	-3.16	0.0203
230126	Shb	-3.16	0.0223
78294	Rps27a	-3.16	0.031
229949	Ak5	-3.16	0.0213
56199	Abcb10	-3.16	0.0382
100272219	AA543186	-3.16	0.0198
100038709	Gm10789	-3.17	0.0203
192650	Cabp7	-3.18	0.0279
258468	Olfr1254	-3.19	0.0195
735308	Mir216b	-3.19	0.039
21939	Cd40	-3.19	0.0486
76220	6530402F18Rik	-3.19	0.041
11641	Akap2	-3.2	0.0191
67283	Slc25a19	-3.21	0.0186
16820	Lcn3	-3.22	0.0204
668339	Gm9112	-3.22	0.0292
140500	Acap3	-3.22	0.026
319997	A630001G21Rik	-3.22	0.0249
77034	2510039O18Rik	-3.22	0.0406
258811	Olfr926	-3.23	0.0227
382062	AB124611	-3.23	0.0346
76448	Ppp1r18	-3.24	0.0195
27405	Abcg3	-3.26	0.042
19652	Rbm3	-3.27	0.0171
225638	Alpk2	-3.27	0.017
18386	Oprd1	-3.28	0.0169
242248	Bank1	-3.28	0.0488
17165	Mapkapk5	-3.29	0.0177
14813	Grin2c	-3.29	0.017
100040852	Gm3002	-3.29	0.0224
98766	Ubac1	-3.3	0.0274
19256	Ptpn20	-3.3	0.0182
100039324	Gm10147	-3.3	0.0259
11784	Apba2	-3.3	0.0168
240185	9430020K01Rik	-3.3	0.0215
100526494	Mir669a-10	-3.31	0.0214
15519	Hsp90aa1	-3.31	0.0163
268739	Arhgef40	-3.31	0.0163
246316	Lgi2	-3.32	0.0195
240168	Rasgrp3	-3.33	0.0191
68328	Rab13	-3.34	0.0173
12566	Cdk2	-3.34	0.0159
93961	B3galt5	-3.34	0.0201
56552	Vmn2r26	-3.35	0.0161
16453	Jak3	-3.35	0.0248
328576	Gm20556	-3.35	0.0277
58992	F12	-3.35	0.0272
70044	Tut1	-3.36	0.0169
80795	Selk	-3.36	0.019
75657	Speer4a	-3.37	0.0161
20971	Sdc4	-3.37	0.0303
69217	Plekha4	-3.37	0.0263
108689	Obfc1	-3.37	0.0277
232827	Nlrp2	-3.37	0.0413
227231	Cps1	-3.37	0.0379
269959	Adamtsl3	-3.37	0.0219
21824	Thbd	-3.39	0.016
16985	Lsp1	-3.39	0.0164
67553	Gstcd	-3.39	0.0174
77920	A330102I10Rik	-3.39	0.0152
74066	4933404G15Rik	-3.39	0.0155
258314	Olfr725	-3.4	0.0165
108058	Camk2d	-3.4	0.0156
83491	Pramel1	-3.42	0.0254
14266	Aff2	-3.42	0.0243
66521	Rwdd1	-3.43	0.025
107047	Psmg2	-3.43	0.0157
257916	Olfr1031	-3.43	0.0147
100169878	Gm10941	-3.43	0.0211
14173	Fgf2	-3.43	0.0273
258820	Olfr1184	-3.45	0.0136
51791	Rgs14	-3.46	0.0251
93712	Pcdhga4	-3.46	0.0144
236690	Nyx	-3.46	0.0137
17131	Smad7	-3.47	0.0135
57312	Mrps31	-3.47	0.0145
57354	Cramp1l	-3.47	0.0248
58206	Zbtb32	-3.48	0.0225
234724	Tat	-3.48	0.0136
70719	Hmha1	-3.48	0.0157
75627	Snapc1	-3.49	0.0185
259053	Olfr362	-3.49	0.0207
280411	Lix1l	-3.49	0.0239
59021	Rab2a	-3.5	0.0196
68857	Dtwd2	-3.5	0.0129
117004	Olfr73	-3.51	0.0133
71952	2410016O06Rik	-3.51	0.0326
215280	Wipf1	-3.52	0.0134
57376	Smarce1	-3.52	0.0185
23893	Grem2	-3.52	0.0143
66523	2810004N23Rik	-3.52	0.0151
71514	Sfpq	-3.53	0.015
67054	Paics	-3.53	0.0215
100041774	Gm10413	-3.53	0.0271
77110	Gpbp1l1	-3.54	0.0199
14174	Fgf3	-3.54	0.0232
20292	Ccl11	-3.54	0.0187
55991	Panx1	-3.55	0.0293
72057	Phf10	-3.58	0.0116
94332	Cadm3	-3.58	0.0152
67888	Tmem100	-3.59	0.0131
11471	Actl7b	-3.59	0.0176
109929	Zbtb25	-3.6	0.0133
77017	E130018N17Rik	-3.6	0.0133
22403	Wisp2	-3.62	0.0138
258492	Olfr484	-3.62	0.0114
76386	1700010D01Rik	-3.62	0.0146
66125	Sf3b5	-3.63	0.0112
17777	Mttp	-3.63	0.0111
22293	Slc45a2	-3.64	0.0139
546980	Vmn2r74	-3.65	0.0202
12609	Cebpd	-3.65	0.0144
13496	Arid3a	-3.67	0.0185
228592	F830045P16Rik	-3.68	0.0154
225020	Fez2	-3.69	0.0114
16434	Itpa	-3.7	0.0137
171580	Mical1	-3.71	0.0101
353504	Dio3os	-3.71	0.0184
241452	Dhrs9	-3.73	0.0154
226652	Arhgap30	-3.73	0.0101
241525	Ypel4	-3.74	0.0172
16693	Krtap11-1	-3.74	0.0126
13449	Dok2	-3.75	0.0276
21819	Tg	-3.76	0.0209
102595	Plekho2	-3.76	0.0178
74775	Lmbr1l	-3.77	0.0131
100040698	Gm2913	-3.77	0.0169
320873	Cdh10	-3.77	0.0093
545798	Tmem233	-3.78	0.00924
381994	E030018B13Rik	-3.78	0.0143
271970	Arsj	-3.78	0.0128
109323	C1qtnf7	-3.79	0.0131
238405	Adam6b	-3.79	0.0154
442809	4932416K20Rik	-3.79	0.00954
12581	Cdkn2d	-3.8	0.00933
24099	Tnfsf13b	-3.81	0.0189
56455	Dynll1	-3.81	0.0109
106264	0610012G03Rik	-3.81	0.0139
171207	Arhgap4	-3.82	0.00916
242608	Podn	-3.84	0.0151
100124483	Mir297c	-3.84	0.00886
22367	Vrk1	-3.85	0.0271
74026	Msl1	-3.86	0.0109
14106	Foxh1	-3.86	0.0107
387343	Tas2r109	-3.87	0.0103
71145	Scara5	-3.89	0.00832
18241	Gpr143	-3.9	0.00934
384009	Glipr2	-3.91	0.0165
12590	Cdx1	-3.91	0.00812
109095	Rbm15b	-3.94	0.00775
258755	Olfr672	-3.95	0.015
545007	Gm5796	-3.95	0.0108
11698	Ambn	-3.97	0.00739
258684	Olfr1459	-3.98	0.0192
216859	Acap1	-3.98	0.0094
19274	Ptprm	-3.99	0.0124
237400	Mex3d	-4	0.0229
102747	Lrrc49	-4	0.0108
14805	Grik1	-4	0.00713
243867	Fbxo46	-4.03	0.00767
75155	4930529K09Rik	-4.03	0.00756
20339	Sele	-4.05	0.00998
100316693	Mir1938	-4.05	0.00776
381413	Gpr176	-4.05	0.0119
76390	Zfp735	-4.06	0.00709
71133	4933422A05Rik	-4.07	0.00688
56470	Rgs19	-4.08	0.00792
258591	Olfr695	-4.09	0.00768
723792	Pinc	-4.14	0.0153
67622	Mxra7	-4.14	0.0443
108121	U2af1	-4.18	0.0122
66801	Prkrip1	-4.18	0.00621
368204	Khdc1a	-4.18	0.0149
14317	Ftcd	-4.19	0.00656
71082	4933416M07Rik	-4.19	0.0125
319172	Hist1h2ab	-4.21	0.0114
27218	Slamf1	-4.22	0.00626
380785	Begain	-4.22	0.0103
14784	Grb2	-4.23	0.0055
100217451	Snora7a	-4.25	0.00891
18196	Nsg1	-4.25	0.00766
546913	Vmn2r22	-4.26	0.0059
244310	Dlgap2	-4.27	0.00663
387213	Mir217	-4.28	0.00888
100502601	Gm19276	-4.31	0.022
21945	Dedd	-4.31	0.0119
319493	A430078G23Rik	-4.31	0.00835
666279	Dspp	-4.32	0.0176
59090	Midn	-4.33	0.00539
66293	1810032O08Rik	-4.34	0.0116
11857	Arhgdib	-4.37	0.0233
14172	Fgf18	-4.4	0.00632
22326	Vax1	-4.42	0.0133
75795	4930455D15Rik	-4.45	0.00434
574081	Defb46	-4.48	0.0172
12258	Serping1	-4.51	0.0189
19414	Rasa3	-4.51	0.00654
68215	Fam98b	-4.53	0.0046
98256	Kmo	-4.57	0.00387
15939	Ier5	-4.61	0.0108
665376	Vmn2r99	-4.63	0.0175
14290	Fpr-rs3	-4.65	0.0334
100043051	Vmn1r149	-4.71	0.00347
723921	Mir350	-4.72	0.00338
15381	Hnrnpc	-4.72	0.014
320456	B330016D10Rik	-4.75	0.00339
219019	Olfr743	-4.79	0.00983
14114	Fbln1	-4.79	0.00802
70365	Speer5-ps1	-4.84	0.00323
52521	Zfp622	-4.85	0.015
245533	Awat1	-4.92	0.00332
50724	Sap30l	-4.95	0.00259
11811	Apobec2	-4.97	0.00264
16478	Jund	-4.99	0.00382
12721	Coro1a	-5	0.00258
245526	Pgr15l	-5.02	0.00239
666085	Vmn2r54	-5.03	0.0118
100502764	Gm16617	-5.13	0.00314
17259	Mef2b	-5.14	0.00284
381832	Prpmp5	-5.21	0.00368
620695	Gm13889	-5.21	0.00314
70730	6330409D20Rik	-5.24	0.00881
66763	4933425L06Rik	-5.24	0.00294
171206	Vmn1r27	-5.25	0.00199
387165	Mir147	-5.25	0.00497
76658	1700123K08Rik	-5.26	0.00228
100628606	Mir3960	-5.29	0.00209
93806	Serpinb9g	-5.38	0.00224
242691	Gpatch3	-5.47	0.00279
16159	Il12a	-5.57	0.00191
24075	Taf10	-5.71	0.00411
319247	9530080O11Rik	-5.71	0.00154
67388	1110008F13Rik	-5.72	0.00231
18760	Prkd1	-5.82	0.00159
68052	Rps13	-5.89	0.00686
12802	Cnr2	-6.02	0.00138
108096	Slco1a5	-6.05	0.00187
13665	Eif2s1	-6.23	0.000874
17771	Mtl5	-6.25	0.00164
503550	Klri1	-6.34	0.000758
238217	Rpl10l	-6.5	0.00174
494124	Calm5	-6.62	0.00108
329421	Myo3b	-6.84	0.00153
231589	Vmn2r13	-6.93	0.00102
100515	Zfp518b	-7.14	0.000512
74100	Arpp21	-8.13	0.00164
56332	Amotl2	-9.6	7.29e-05
140499	Ube2j2	-9.65	0.000121

## Sheet: NPp53 Abi Exp vs NPp53 Veh
Dataset S1D: Differentially expressed genes between NPp53 abiraterone-exceptional versus NPp53 vehicle (p<0.05)
Mouse entrez	Symbol	t-statistics	p-value
19718	Rfc2	79.2	3.41e-05
72136	Chst14	32.3	8.57e-06
67416	Armcx2	29.2	1e-05
75646	Rai14	29	0.000259
64297	Gprc5b	24	1.8e-05
77358	9430069I07Rik	23.5	0.000635
75590	Dusp9	23.1	3.07e-05
71409	Fmnl2	22.9	0.000464
56205	Ensa	22.9	0.000537
226519	Lamc1	22.6	0.000278
93706	Pcdhgc3	22.5	2.44e-05
68479	Phf5a	22	3.49e-05
232679	Zc3hc1	21.7	0.000183
18582	Pde6d	21.6	0.00193
21983	Tpbg	21.5	3.1e-05
12267	C3ar1	21.2	7.63e-05
320924	Ccbe1	21.1	0.00184
66593	Diablo	20.9	0.000414
107746	Rapgef1	20.2	4.6e-05
24015	Abce1	20	0.000148
23892	Grem1	19.7	3.89e-05
73046	Glrx5	19.4	0.00022
80294	Pofut2	19.2	0.000201
67042	Ift27	19.2	5.09e-05
545085	Wdr70	19.1	5.8e-05
22158	Tulp3	19.1	0.000188
80860	Ghdc	18.9	0.00122
22321	Vars	18.8	8.3e-05
77579	Myh10	18.8	0.000158
27214	Dbf4	18.5	0.00123
553127	Cxx1b	18.5	0.000682
226830	Smyd2	18.3	7.76e-05
16775	Lama4	18	8.09e-05
27801	Zdhhc8	17.9	0.000828
75991	Slain2	17.5	0.00176
76448	Ppp1r18	17.4	0.000274
382245	Tmem29	17.3	0.00322
269713	Clip2	17.2	9.5e-05
12615	Cenpa	17.2	0.000525
22628	Ywhag	16.9	0.00101
22352	Vim	16.9	0.000502
20873	Plk4	16.9	8.76e-05
56412	Noa1	16.9	7.61e-05
71449	Mettl13	16.9	7.3e-05
54667	Atp8b2	16.9	7.6e-05
11883	Arsa	16.9	0.000104
66194	Pycrl	16.8	0.00239
78514	Arhgap10	16.8	8.3e-05
75939	4930579G24Rik	16.8	0.00188
15394	Hoxa1	16.7	0.00158
218977	Dlgap5	16.7	0.000757
234912	9230110C19Rik	16.6	7.82e-05
170736	Parvb	16.5	0.000138
320634	Ocrl	16.5	0.00286
12631	Cfl1	16.5	0.000322
192654	Pla2g15	16.4	0.000883
66158	Cxx1a	16.4	0.00031
226861	Hhat	16.3	0.000345
50997	Mpp2	15.9	0.00185
237360	Adamts14	15.8	0.00257
56292	Naa10	15.6	0.000114
217333	Trim47	15.5	0.000956
18196	Nsg1	15.5	0.000838
66515	Cul7	15.5	0.000673
217031	Tada2a	15.3	0.0002
54637	Praf2	15.3	0.000482
97064	Wwtr1	15.2	0.00058
74252	Armc1	15.2	0.00118
71988	Esco2	15	0.000413
71914	Antxr2	15	0.00334
208691	Eif5a2	14.9	0.00027
16852	Lgals1	14.8	0.000358
78246	Phf23	14.6	0.00038
67203	Nde1	14.6	0.000149
225020	Fez2	14.6	0.000251
60315	Myg1	14.4	0.000441
66192	Lage3	14.3	0.000546
13732	Emp3	14.3	0.00201
56350	Arl3	14.2	0.000656
192662	Arhgdia	14.2	0.00041
11632	Aip	14.2	0.00353
13712	Elk1	14.1	0.000927
18933	Prrx1	14	0.00018
14089	Fap	14	0.00113
71810	Ranbp3	13.8	0.00359
259300	Ehd2	13.8	0.000263
22171	Tyms	13.7	0.00305
102693	Phldb1	13.7	0.000188
20557	Slfn3	13.6	0.00049
244864	Layn	13.6	0.000381
21826	Thbs2	13.5	0.00467
226144	Erlin1	13.5	0.000213
209630	Frmd4a	13.4	0.00345
27081	Zfp275	13.3	0.00222
547176	Zc3h12b	13.3	0.000462
12835	Col6a3	13.3	0.000606
242509	Bnc2	13.3	0.003
100978	Nfxl1	13.2	0.000196
68537	Mrpl13	13.2	0.000491
108797	Mex3b	13.2	0.000506
223921	Aaas	13.2	0.000579
16579	Kifap3	13	0.000278
21877	Tk1	12.9	0.000246
56210	Rev1	12.9	0.000625
110109	Nop2	12.9	0.000206
80884	Maged2	12.9	0.00144
338362	Ust	12.8	0.0042
78733	Troap	12.8	0.0018
20810	Srm	12.8	0.000242
235567	Dnajc13	12.8	0.000395
229725	Clcc1	12.8	0.000244
54124	Cks1b	12.8	0.000686
100678	Psph	12.6	0.00117
107528	Magee1	12.6	0.000242
15530	Hspg2	12.6	0.000583
67778	Zfp639	12.5	0.000377
226122	Ubtd1	12.5	0.00135
51795	Srpx	12.5	0.00324
114715	Spred1	12.5	0.000456
26427	Creb3l1	12.4	0.00589
22143	Tuba1b	12.3	0.000249
67057	Yaf2	12.2	0.00653
68304	Kdelc2	12.2	0.000363
223739	5031439G07Rik	12.2	0.000645
52033	Pbk	12.1	0.000276
106326	Osbpl11	12.1	0.00522
73124	Golim4	12.1	0.000318
69639	Exosc8	12.1	0.00129
105988	Espl1	12.1	0.00315
14702	Gng2	12	0.00442
223691	Eif3l	12	0.00347
18720	Pip5k1a	11.9	0.000666
22240	Dpysl3	11.9	0.000379
216724	Rufy1	11.8	0.000898
19384	Ran	11.8	0.00335
109225	Ms4a7	11.8	0.000488
12617	Cenpc1	11.8	0.000326
71766	Raver1	11.7	0.000368
67210	Gatad1	11.7	0.000851
14182	Fgfr1	11.7	0.000346
12029	Bcl6b	11.7	0.000313
20563	Slit2	11.6	0.00646
53381	Prdx4	11.6	0.000431
219072	Haus4	11.6	0.00293
77622	Apex2	11.6	0.00156
65114	Vps35	11.5	0.00316
93684	2016-09-15	11.5	0.00154
17392	Mmp3	11.5	0.0033
26390	Mapkbp1	11.5	0.00259
17448	Mdh2	11.4	0.00182
100039805	D5Ertd605e	11.4	0.000555
56693	Crtap	11.4	0.00202
330173	2610524H06Rik	11.4	0.00139
58996	Arhgap23	11.3	0.00243
11749	Anxa6	11.3	0.000414
69159	Rhebl1	11.2	0.00152
78929	Polr3h	11.2	0.00139
14020	Evi5	11.2	0.000766
19141	Lgmn	11.1	0.0019
66066	Gng11	11.1	0.00137
140780	Bmp2k	11.1	0.00375
57267	Apba3	11.1	0.00228
20720	Serpine2	11	0.00206
14696	Gnb4	11	0.00646
18612	Etv4	11	0.00802
66684	Tceal8	10.9	0.000597
72135	Pygo1	10.9	0.000611
209773	Dennd2a	10.9	0.00192
104444	Rexo2	10.8	0.0041
242914	Gm4961	10.8	0.00352
13730	Emp1	10.8	0.000421
13713	Elk3	10.8	0.00107
59031	Chst12	10.8	0.00231
15529	Sdc2	10.7	0.000433
67710	Polr2g	10.7	0.00079
18595	Pdgfra	10.6	0.00709
100502921	Gm10142	10.6	0.00369
14615	Gjc1	10.6	0.000461
328232	Gfod1	10.6	0.000496
212898	Dse	10.6	0.00114
244745	Dpy19l1	10.6	0.00806
27221	Chaf1a	10.6	0.00204
72960	Top1mt	10.5	0.007
24045	Scamp3	10.5	0.00047
72151	Rfc5	10.5	0.00156
84652	Fam126a	10.5	0.00702
108153	Adamts7	10.5	0.00661
18769	Pkig	10.4	0.00405
66977	Nuf2	10.4	0.000847
14235	Foxm1	10.4	0.00507
13385	Dlg4	10.4	0.00264
13194	Ddb1	10.4	0.00411
14793	Cdca3	10.4	0.00316
12539	Cdc37	10.4	0.000772
17089	Lyar	10.3	0.000574
503847	Ear14	10.3	0.00103
102920	Cenpi	10.3	0.000851
66929	Asf1b	10.3	0.00712
239027	Arhgap22	10.3	0.00399
21335	Tacc3	10.2	0.00578
20492	Slbp	10.2	0.00262
76915	Mnd1	10.2	0.000559
67454	Ikbip	10.2	0.000537
217149	Cisd3	10.2	0.00425
20448	St6galnac4	10.1	0.000554
69833	Polr2f	10.1	0.00074
58223	Mmp19	10.1	0.00515
625901	Gm6634	10.1	0.000558
69719	Cad	10.1	0.00643
12181	Bop1	10.1	0.000646
65247	Asb1	10.1	0.000811
72056	1810055G02Rik	10.1	0.000925
170744	Tlr8	10	0.000966
213211	Rnf26	10	0.00158
14205	Figf	10	0.00405
67269	Agtpbp1	10	0.00096
22402	Wisp1	9.98	0.00337
19357	Rad21	9.97	0.00411
76582	Ipo11	9.94	0.000604
72661	Serp2	9.93	0.00329
11534	Adk	9.9	0.00124
279653	Pcdh19	9.89	0.00929
244595	Ces1a	9.87	0.0013
108160	Fam50a	9.86	0.00471
14156	Fen1	9.85	0.00101
55944	Eif3d	9.85	0.00221
11754	Aoc3	9.83	0.00189
18822	Plod1	9.82	0.00549
19362	Rad51ap1	9.81	0.00101
78330	Ndufv3	9.81	0.0007
218544	Sgtb	9.79	0.00506
76809	Bri3bp	9.79	0.000617
23988	Pin1	9.78	0.00186
26934	Racgap1	9.75	0.00308
13555	E2f1	9.74	0.00222
19250	Ptpn14	9.73	0.000693
94275	Maged1	9.72	0.00957
67629	Spc24	9.71	0.00141
60527	Fads3	9.7	0.00529
56452	Orc6	9.69	0.00207
238505	Mtr	9.67	0.00285
18792	Plau	9.66	0.00526
16506	Kcnd1	9.66	0.00819
67273	Ndufa10	9.65	0.00128
101113	Snx21	9.63	0.00218
74145	F13a1	9.63	0.0022
76123	Gpsm2	9.61	0.0048
74254	Gpn1	9.6	0.00233
108679	Cops8	9.58	0.000725
26360	Angptl2	9.58	0.00915
56409	Nudt3	9.57	0.00078
19038	Ppic	9.55	0.000673
327766	Tmem26	9.54	0.0012
19262	Ptpra	9.54	0.00471
16971	Lrp1	9.51	0.00363
14230	Fkbp10	9.51	0.00128
106014	Fam19a5	9.5	0.00108
12832	Col5a2	9.5	0.00116
52696	Zwint	9.49	0.000752
57434	Xrcc2	9.49	0.000861
271970	Arsj	9.49	0.00296
26362	Axl	9.47	0.000788
18974	Pole2	9.45	0.00169
70699	Nup205	9.45	0.00204
53356	Eif3g	9.45	0.00507
17384	Mmp10	9.42	0.000855
72844	Kctd17	9.4	0.00725
68743	Anln	9.38	0.0025
110532	Adarb1	9.38	0.00507
69608	Sec24d	9.37	0.00249
26891	Cops4	9.37	0.00219
79456	Recql4	9.36	0.00128
213272	Txndc2	9.33	0.0045
68565	Mrps18a	9.33	0.00164
107823	Whsc1	9.31	0.0072
69091	Vps26b	9.31	0.00154
12466	Cct6a	9.31	0.00148
18113	Nnmt	9.3	0.00109
70779	Prdm5	9.29	0.00135
14852	Gspt1	9.29	0.000773
234463	Tmem184c	9.27	0.00279
20224	Sar1a	9.26	0.00113
26893	Cops6	9.26	0.0012
108686	Ccdc88a	9.24	0.00322
67054	Paics	9.23	0.00809
18073	Nid1	9.2	0.00589
15254	Hint1	9.19	0.00299
69941	2810408I11Rik	9.19	0.00321
66616	Snx9	9.18	0.00116
18718	Pip4k2a	9.15	0.000884
12361	Cask	9.15	0.000904
216197	Ckap4	9.13	0.00351
18491	Pappa	9.12	0.00539
53323	Ube2k	9.11	0.0097
69716	Trip13	9.11	0.000807
209737	Kif15	9.11	0.00857
320184	Lrrc58	9.09	0.00591
72720	Zfp248	9.06	0.00175
20112	Rps6ka2	9.06	0.0045
20019	Polr1a	9.05	0.000867
20937	Suv39h1	9.04	0.00856
26886	Cenph	9.01	0.00502
16950	Loxl3	9	0.00118
236539	Phgdh	8.99	0.00847
67533	Ppfibp1	8.96	0.00808
11799	Birc5	8.95	0.00536
73296	Rhobtb3	8.94	0.000878
71918	Zcchc24	8.93	0.00667
107272	Psat1	8.93	0.0118
108014	Srsf9	8.92	0.00126
67468	Mmd	8.89	0.00135
56358	Copz2	8.88	0.0012
70317	Arl16	8.88	0.00572
319996	Casc4	8.86	0.00203
20198	S100a4	8.82	0.000989
19058	Ppp3r1	8.82	0.00464
223693	Tmem184b	8.79	0.000936
19045	Ppp1ca	8.79	0.00375
11513	Adcy7	8.79	0.00132
57315	Wdr46	8.78	0.00104
22341	Vegfc	8.78	0.00105
98170	Tmem132a	8.78	0.00544
20613	Snai1	8.78	0.000949
64296	Abhd8	8.77	0.00138
14739	S1pr2	8.76	0.00923
17121	Mxd3	8.76	0.0069
245522	Zc4h2	8.75	0.00543
18861	Pms2	8.75	0.00116
71735	Lrwd1	8.74	0.00095
18102	Nme1	8.73	0.00885
18187	Nrp2	8.72	0.00542
67391	Fundc2	8.71	0.00152
14239	Foxs1	8.71	0.00127
211577	Mrgprf	8.68	0.00167
71683	Gypc	8.68	0.00307
11989	Slc7a3	8.67	0.0015
14086	Fscn1	8.66	0.00164
70445	Cd248	8.66	0.00679
12260	C1qb	8.64	0.00106
74868	Tmem65	8.62	0.00334
17713	Grpel1	8.62	0.00995
328977	Zfp532	8.6	0.0012
171167	Fut10	8.6	0.00845
12831	Col5a1	8.59	0.0054
231506	Lin54	8.57	0.00102
12826	Col4a1	8.57	0.00128
320799	Zhx3	8.56	0.00626
327900	Ubtd2	8.54	0.00106
109212	Fam64a	8.54	0.00124
104718	Ttc7b	8.52	0.00746
329777	Pigk	8.52	0.00171
14700	Gng10	8.52	0.00426
12827	Col4a2	8.52	0.00127
258548	Olfr805	8.51	0.00105
231413	Grsf1	8.51	0.00917
12259	C1qa	8.49	0.00494
20450	St8sia2	8.48	0.00109
19076	Prim2	8.47	0.00641
21855	Timm17b	8.46	0.00112
245537	Nlgn3	8.45	0.0075
68087	Dcakd	8.45	0.0128
20826	Nhp2l1	8.44	0.00133
20469	Sipa1	8.43	0.0024
27401	Skp2	8.41	0.00122
22701	Zfp41	8.4	0.0012
74383	Ubap2l	8.39	0.00119
55963	Slc1a4	8.39	0.00275
105847	Lmf2	8.39	0.0108
192187	Stab1	8.38	0.0025
67788	Sfr1	8.37	0.00115
71492	Bbs7	8.37	0.00118
17534	Mrc2	8.35	0.00121
107476	Acaca	8.35	0.00405
67111	Naaa	8.34	0.0012
13518	Dst	8.34	0.00989
214901	Chtf18	8.34	0.00163
66468	Ska1	8.32	0.0107
17174	Masp1	8.32	0.00948
268465	Eme1	8.31	0.0101
16777	Lamb1	8.3	0.0118
18969	Pola2	8.29	0.0125
383348	Kctd16	8.29	0.00179
66714	4921524J17Rik	8.29	0.00326
268697	Ccnb1	8.28	0.00721
100504104	Gm16062	8.27	0.00118
18669	Abcb1b	8.27	0.00218
12903	Crabp1	8.26	0.0018
100710	Pds5b	8.24	0.0012
18542	Pcolce	8.24	0.00287
54638	Ccdc22	8.23	0.00172
217216	BC030867	8.21	0.00319
269608	Plekhg5	8.19	0.00343
20901	Strap	8.18	0.00372
54632	Ftsj1	8.16	0.00623
30056	Timm9	8.14	0.0119
66406	Sac3d1	8.14	0.0143
236792	Mmgt1	8.14	0.014
108912	Cdca2	8.14	0.0102
19085	Prkar1b	8.11	0.00238
269378	Ahcy	8.11	0.00137
72584	Cul4b	8.1	0.00206
53418	B4galt2	8.1	0.00198
56150	Mad2l1	8.09	0.00848
15366	Hmmr	8.09	0.0114
64138	Ctsz	8.08	0.00129
269033	4930503L19Rik	8.08	0.00153
380969	Nckap5l	8.07	0.00312
22184	Zrsr2	8.06	0.0146
545389	Cep170	8.06	0.00239
19152	Prtn3	8.04	0.0122
12447	Ccne1	8.04	0.00627
12314	Calm2	8.04	0.0117
16905	Lmna	8.03	0.00218
244548	Elmod2	8.02	0.00149
67963	Npc2	7.99	0.00415
16416	Itgb3	7.99	0.00181
94352	Loxl2	7.98	0.00456
12035	Bcat1	7.98	0.00166
18049	Ngf	7.97	0.0086
76527	Il34	7.96	0.00558
66570	Cenpm	7.96	0.00376
107071	Wdr74	7.93	0.00293
50720	Sacs	7.93	0.00284
211548	Nomo1	7.93	0.0129
67458	Ergic1	7.93	0.00153
13665	Eif2s1	7.93	0.00137
65099	Irak1bp1	7.92	0.00406
68724	Arl8a	7.92	0.00139
21973	Top2a	7.91	0.0124
108946	Zzz3	7.9	0.00237
17112	Tm4sf1	7.9	0.0152
66521	Rwdd1	7.9	0.0127
15248	Hic1	7.88	0.00901
27052	Aoah	7.87	0.00146
19338	Rab33b	7.86	0.0019
20855	Stc1	7.85	0.00411
320078	Olfml2b	7.85	0.00694
105278	Cdk20	7.84	0.00198
613262	BC029722	7.84	0.0031
170767	Rfxap	7.83	0.00385
20534	Slc4a1ap	7.82	0.00468
72351	Ptar1	7.8	0.00165
236930	Ercc6l	7.78	0.00361
13448	Dok1	7.77	0.0103
70358	Steap1	7.76	0.00152
140792	Colec12	7.76	0.00166
24001	Tiam2	7.74	0.00161
20750	Spp1	7.74	0.00608
208659	Fam20a	7.74	0.0121
14068	F7	7.73	0.00174
74175	Crct1	7.73	0.00164
217826	Kcnk13	7.72	0.014
74012	Rap2b	7.71	0.0118
14218	Sh3pxd2a	7.7	0.0023
21810	Tgfbi	7.69	0.00156
18521	Pcbp2	7.69	0.0034
215280	Wipf1	7.67	0.00858
71768	Vwce	7.67	0.00398
23825	Banf1	7.67	0.00646
108012	Ap1s2	7.67	0.0127
80905	Polh	7.65	0.00316
16443	Itsn1	7.65	0.00416
18596	Pdgfrb	7.64	0.0163
231672	Fbxw8	7.64	0.0118
26433	Plod3	7.63	0.0133
117148	Necab2	7.63	0.00416
233064	Wdr62	7.62	0.00171
26406	Map3k3	7.62	0.00226
13870	Ercc1	7.62	0.0017
16413	Itgb1bp1	7.61	0.00689
217203	Tmem106a	7.6	0.00464
19227	Pthlh	7.6	0.00266
231887	Pdap1	7.6	0.0114
18392	Orc1	7.6	0.00193
16402	Itga5	7.6	0.00165
235559	Topbp1	7.59	0.00479
18516	Pbx3	7.58	0.00393
258975	Olfr1234	7.57	0.0165
67455	Klhl13	7.56	0.00211
71703	Armcx3	7.56	0.0119
240185	9430020K01Rik	7.56	0.0127
353172	Gars	7.55	0.00318
14268	Fn1	7.55	0.00291
13132	Dab2	7.55	0.00166
17692	Msl3	7.54	0.00812
56454	Aldh18a1	7.54	0.00448
226747	Ahctf1	7.54	0.0021
72662	Dis3	7.53	0.00696
102566	Ano10	7.52	0.00192
20196	S100a13	7.51	0.0124
72522	Atxn7l2	7.51	0.00332
74761	Mxra8	7.5	0.00438
414801	Itprip	7.5	0.0086
20194	S100a10	7.49	0.00183
17161	Maoa	7.49	0.00309
11477	Acvr1	7.48	0.0155
72607	Usp13	7.47	0.0114
235072	2016-09-07	7.46	0.00185
12545	Cdc7	7.46	0.00184
20877	Aurkb	7.46	0.0163
72657	2700094K13Rik	7.46	0.0164
66336	Cenpp	7.45	0.0146
75746	Morc4	7.44	0.00205
56390	Sssca1	7.43	0.0149
224897	Dpp9	7.41	0.00921
52864	Slx4	7.4	0.0042
233406	Prc1	7.4	0.00835
16571	Kif4	7.4	0.0137
20022	Polr2j	7.39	0.00424
17698	Msn	7.39	0.00476
68975	Med27	7.39	0.00382
104156	Etv5	7.39	0.00643
108927	Lhfp	7.37	0.00254
70495	Atp6ap2	7.37	0.00184
18475	Pafah1b2	7.36	0.00279
70021	Nt5dc2	7.36	0.00866
64658	Mrps25	7.36	0.00777
17181	Matn2	7.36	0.00385
269799	Clec4a1	7.36	0.00271
76044	Ncapg2	7.35	0.017
17120	Mad1l1	7.35	0.0178
14791	Emg1	7.34	0.00192
19181	Psmc2	7.33	0.00268
78894	Aacs	7.33	0.00276
66854	Trim35	7.32	0.00248
14299	Ncs1	7.32	0.0153
56433	Vps29	7.31	0.0166
66841	Etfdh	7.31	0.00272
215114	Hip1	7.3	0.0141
338368	Fam109b	7.3	0.00907
77022	2700099C18Rik	7.29	0.00343
18760	Prkd1	7.28	0.0113
18824	Plp2	7.28	0.0136
58859	Efemp2	7.28	0.0162
108671	Dnajc9	7.28	0.00241
17533	Mrc1	7.27	0.00582
107029	Me2	7.27	0.00366
320139	Ptpn7	7.25	0.0171
13039	Ctsl	7.25	0.00666
68262	Agpat4	7.25	0.00253
18214	Ddr2	7.24	0.00423
12549	Arhgap31	7.24	0.00788
381802	Tsen2	7.23	0.00421
268395	Mpg	7.23	0.00347
54633	Pqbp1	7.22	0.00498
74016	Phf19	7.22	0.00346
226432	Ipo9	7.22	0.0111
13684	Eif4e	7.22	0.0135
243362	Stard13	7.21	0.0178
191578	Helq	7.21	0.0181
19317	Qk	7.2	0.00542
76365	Tbx18	7.19	0.00202
18645	Pfn2	7.18	0.00203
66801	Prkrip1	7.17	0.0123
226844	Mfsd7b	7.17	0.00201
16889	Lipa	7.17	0.00608
66583	Exosc1	7.17	0.0153
20652	Soat1	7.16	0.00564
18938	Ppp1r14b	7.16	0.00203
58193	Extl2	7.16	0.0169
109075	Exosc4	7.16	0.0142
56397	Morf4l2	7.15	0.00342
15193	Hdgfrp2	7.15	0.00215
218639	Arl15	7.15	0.00279
19746	Rhd	7.14	0.00597
231889	Bud31	7.14	0.0021
170743	Tlr7	7.13	0.0169
83456	Mov10l1	7.13	0.00206
70827	Trak2	7.12	0.00365
20187	Ryk	7.12	0.00326
66311	Cenpw	7.11	0.00207
19376	Rab34	7.09	0.0178
52323	Klhl7	7.09	0.00337
72709	C1qtnf6	7.08	0.0167
243274	Tmem132d	7.07	0.00277
22123	Psmd3	7.07	0.00222
26404	Map3k12	7.07	0.0183
105785	Kdelr3	7.06	0.00212
26903	Dysf	7.05	0.0106
69071	Tmem97	7.04	0.00239
18951	2016-09-05	7.04	0.0061
320705	Bend6	7.03	0.0022
29813	Zfp385a	7.02	0.0114
16206	Lrig1	7.01	0.0188
68519	Eml1	7.01	0.00572
224829	Trerf1	7	0.00926
212937	Tifab	7	0.00563
69736	Nup37	7	0.0026
68427	Slc39a13	6.99	0.00569
271697	Cdk15	6.99	0.0124
11695	Alx4	6.99	0.00478
93703	Pcdhgb6	6.98	0.00621
54392	Ncapg	6.98	0.0113
73690	Glipr1	6.98	0.0197
12704	Cit	6.98	0.0189
16328	Cep250	6.98	0.00252
216964	Trp53i13	6.97	0.0096
84095	Pi4k2a	6.97	0.00406
54364	Rpp30	6.96	0.00227
110960	Tars	6.95	0.00427
102644	Oaf	6.95	0.0175
171506	H1foo	6.95	0.00339
55936	Ctps2	6.95	0.00279
21413	Tcf4	6.94	0.00229
53867	Col5a3	6.94	0.0158
271813	Agbl2	6.94	0.00394
20334	Sec23a	6.93	0.00294
50706	Postn	6.93	0.0023
18706	Pik3ca	6.93	0.00432
108143	Taf9	6.92	0.00318
20597	Smpd1	6.92	0.00683
70804	Pgrmc2	6.92	0.0046
72029	Cnpy3	6.92	0.0117
67803	Limd2	6.91	0.016
13486	Dr1	6.9	0.00368
107513	Ssr1	6.89	0.00304
13447	Doc2b	6.89	0.0172
67433	Ccdc127	6.89	0.0101
56177	Olfm1	6.88	0.00485
74013	Rftn2	6.87	0.00341
19348	Kif20a	6.86	0.0205
66248	Alg5	6.86	0.00678
22099	Tsn	6.85	0.0028
16211	Kpnb1	6.85	0.00457
17912	Myo1b	6.84	0.00882
100042453	Gm3852	6.84	0.0178
14017	Evi2a	6.84	0.016
12462	Cct3	6.84	0.00405
12389	Cav1	6.83	0.0175
12544	Cdc45	6.81	0.0131
12406	Serpinh1	6.8	0.00625
17289	Mertk	6.8	0.0156
68521	Fam189b	6.8	0.00247
319446	Dpep2	6.8	0.00509
13196	Asap1	6.8	0.0036
269113	Nup54	6.79	0.0131
104884	Tdp1	6.78	0.0127
20523	Slc25a14	6.78	0.0172
20288	Msr1	6.78	0.0103
12321	Calu	6.78	0.0111
70103	Znhit1	6.77	0.0034
67893	Tmem86a	6.77	0.017
27368	Tbl2	6.77	0.00578
100124473	Mir465b-1	6.77	0.00502
170643	Kirrel	6.77	0.00734
217737	Ahsa1	6.77	0.0074
28035	Usp39	6.76	0.00825
227059	Slc39a10	6.76	0.0148
50490	Nox4	6.76	0.00448
57138	Slc12a5	6.75	0.00303
26611	Rcn2	6.75	0.00545
70769	Nolc1	6.75	0.00652
56772	Mllt11	6.75	0.0078
11732	Ank	6.75	0.0208
22247	Umps	6.73	0.0131
118452	Baalc	6.72	0.0195
100503043	Armcx4	6.72	0.0139
12034	Phb2	6.7	0.00271
27756	Lsm2	6.7	0.013
17083	Tmed1	6.68	0.0206
67121	Mastl	6.68	0.00589
15284	Hlx	6.68	0.00387
19744	Rheb	6.67	0.00742
11461	Actb	6.67	0.00269
22021	Tpst1	6.66	0.00734
68475	Ssna1	6.66	0.00826
68298	Ncapd2	6.66	0.0169
78394	Ddx52	6.66	0.00369
11863	Arnt	6.66	0.00463
20444	St3gal2	6.65	0.012
227867	Epc2	6.65	0.00298
445007	Nup85	6.64	0.0166
56095	Ftsj3	6.64	0.00268
101966	D8Ertd738e	6.64	0.00561
58186	Rad18	6.63	0.00372
15469	Prmt1	6.63	0.00625
66448	Mrpl20	6.63	0.00297
13992	Khdrbs3	6.63	0.00626
75723	Amotl1	6.63	0.00371
233033	Samd4b	6.62	0.0104
242253	Wdr63	6.61	0.0199
71709	Syde1	6.61	0.00272
53881	Slc5a3	6.61	0.00273
27061	Bcap31	6.61	0.0216
226409	Zranb3	6.6	0.00606
14955	H19	6.6	0.00278
26895	Cops7b	6.6	0.0145
328801	Zfp414	6.59	0.00337
234967	Slc36a4	6.59	0.0135
13610	S1pr3	6.59	0.00481
19092	Prkg2	6.59	0.0169
69675	Pxdn	6.58	0.0203
321022	Cdv3	6.58	0.00285
209032	Zc3hav1l	6.57	0.00465
218454	Lhfpl2	6.57	0.0214
14276	Folr2	6.57	0.00288
68166	Spire1	6.56	0.0129
65969	Cubn	6.55	0.00733
78372	Snrnp25	6.54	0.00394
15401	Hoxa4	6.54	0.012
54394	Crlf3	6.54	0.0114
218973	Wdhd1	6.53	0.0115
27103	Eif2ak4	6.53	0.016
208628	Kntc1	6.52	0.0114
233107	Kctd15	6.52	0.0031
66614	Gpatch4	6.52	0.00342
77862	Thyn1	6.51	0.00542
93761	Smarca1	6.51	0.00617
97961	Nol12	6.51	0.00289
233836	Slc5a11	6.5	0.0029
17686	Msh3	6.5	0.00301
103768	Tubg2	6.49	0.00505
94062	Mrpl3	6.47	0.00904
110829	Lims1	6.47	0.00318
170829	Tram2	6.46	0.0178
106795	Tcf19	6.46	0.0172
106707	Rpusd1	6.46	0.00607
216233	Socs2	6.45	0.0121
13003	Vcan	6.44	0.00344
13612	Edil3	6.44	0.0074
78796	Zcchc4	6.43	0.00422
226518	Nmnat2	6.43	0.00372
320878	Mical2	6.43	0.00316
14062	F2r	6.43	0.0103
73916	Ift57	6.42	0.00322
14457	Gas7	6.42	0.0213
278097	Armcx6	6.42	0.018
13929	Amz2	6.41	0.0177
75597	Ndufaf2	6.4	0.00611
58251	BC100451	6.4	0.0082
67052	Ndc80	6.39	0.0168
23939	Mapk7	6.39	0.00788
54188	Cpsf4	6.39	0.00815
12842	Col1a1	6.38	0.0127
212090	Tmem60	6.37	0.0142
70454	Cenpl	6.37	0.00311
109624	Cald1	6.37	0.0032
109652	Acy1	6.37	0.00319
381633	Gm1673	6.36	0.00381
13495	Drg2	6.36	0.0218
68539	Tmem109	6.35	0.00331
17215	Mcm3	6.35	0.0143
17220	Mcm7	6.34	0.0148
12632	Cfl2	6.34	0.0109
12428	Ccna2	6.33	0.0188
30939	Pttg1	6.32	0.00781
22379	Fmnl3	6.32	0.0206
12578	Cdkn2a	6.32	0.00506
78512	3300005D01Rik	6.32	0.0187
216395	Tmem5	6.31	0.00323
54141	Spag5	6.31	0.0235
56191	Tro	6.3	0.0103
72290	Lsm11	6.3	0.00335
74107	Cep55	6.3	0.0135
381549	Zfp69	6.29	0.0144
67951	Tubb6	6.29	0.00376
226026	Smc5	6.29	0.0116
108083	Pip4k2b	6.29	0.00327
14129	Fcgr1	6.29	0.00656
71994	Cnn3	6.29	0.00332
24136	Zeb2	6.28	0.0048
67865	Rgs10	6.28	0.00357
404710	Iqgap3	6.28	0.00938
100043424	Gm14005	6.28	0.0154
66156	Anapc11	6.28	0.0165
231915	Uspl1	6.27	0.00531
72572	Spats2	6.27	0.0107
105837	Mtbp	6.27	0.00331
14561	Gdf11	6.27	0.0231
18483	Palm	6.26	0.0051
77951	Cyp20a1	6.26	0.0188
72017	Cyb5r1	6.26	0.00346
12532	Cdc25c	6.26	0.0206
27966	Rrp9	6.25	0.014
19185	Psmd4	6.24	0.0183
23790	Coro1c	6.24	0.0154
67849	Cdca5	6.24	0.0174
74018	Als2	6.24	0.00834
257947	Olfr543	6.23	0.0206
212307	Mapre2	6.23	0.00388
13429	Dnm1	6.23	0.0189
73192	Xpot	6.22	0.0119
67674	Trmt112	6.22	0.00646
60409	Trappc4	6.22	0.0096
12581	Cdkn2d	6.22	0.0129
239408	Tmem74	6.21	0.0128
52206	Anapc4	6.21	0.0125
14163	Fgd1	6.2	0.00816
107508	Eprs	6.2	0.00493
18968	Pola1	6.19	0.0095
14314	Fstl1	6.19	0.00402
319216	4932441J04Rik	6.19	0.0137
24066	Spry4	6.18	0.0132
226541	Klhl20	6.18	0.00454
104816	Aspg	6.18	0.00725
69104	2016-03-05	6.17	0.00535
15213	Hey1	6.17	0.0197
12534	Cdk1	6.17	0.0223
14489	Mtpn	6.16	0.00651
71878	Fam83d	6.16	0.0178
73739	Cby1	6.16	0.0101
73692	2410089E03Rik	6.16	0.0063
17475	Mpdz	6.15	0.00917
14115	Fbln2	6.15	0.00477
269682	Golga3	6.14	0.00406
13008	Csrp2	6.14	0.00386
66074	Tmem167	6.13	0.00374
223435	Trio	6.11	0.00407
229285	Spg20	6.09	0.0232
22785	Slc30a4	6.09	0.0151
60530	Fignl1	6.09	0.0141
76843	Dtl	6.09	0.00751
20365	Serf1	6.08	0.00797
60365	Rbm8a	6.08	0.0144
381318	Nsl1	6.08	0.00412
228875	Slc35c2	6.07	0.0173
72119	Tpx2	6.06	0.0197
59092	Pcbp4	6.06	0.0179
209318	Gps1	6.06	0.00989
72162	Dhx36	6.06	0.00459
102075	Plekhg4	6.05	0.0192
12607	Cebpz	6.05	0.0212
56551	Txn2	6.04	0.00952
18643	Pfn1	6.04	0.0201
280411	Lix1l	6.04	0.0259
240514	Ccdc85b	6.04	0.00872
20692	Sparc	6.03	0.00454
17105	Lyz2	6.03	0.0212
211228	Lrrc25	6.03	0.00572
22142	Tuba1a	6.02	0.00401
17132	Maf	6.02	0.0144
14201	Fhl3	6.02	0.0178
241520	Fam171b	6.02	0.00387
12316	Aspm	6.01	0.0252
69922	Vrk2	6	0.00419
223696	Tomm22	6	0.00907
67738	Ppid	6	0.00844
258723	Olfr781	6	0.00522
100628597	Mir5128	6	0.0152
16568	Kif3a	6	0.0065
330119	Adamts3	6	0.0229
20970	Sdc3	5.99	0.0039
19988	Rpl6	5.99	0.0215
17918	Myo5a	5.99	0.0233
12822	Col18a1	5.99	0.0213
226841	Vash2	5.98	0.00913
78581	Utp23	5.98	0.00414
67414	Mfn1	5.98	0.00393
17768	Mthfd2	5.97	0.00768
13601	Ecm1	5.97	0.0196
232339	Ankrd26	5.97	0.00539
11532	Adh5	5.97	0.00594
21417	Zeb1	5.96	0.027
235402	Lingo1	5.96	0.0139
245596	Hdx	5.96	0.0078
100038746	Gm1976	5.96	0.00735
23880	Fyb	5.96	0.0123
192658	Rfpl4	5.95	0.0106
217232	Cdc27	5.95	0.0127
12465	Cct5	5.95	0.00883
93686	Rbfox2	5.94	0.0111
13617	Ednra	5.94	0.00591
19328	Rab12	5.92	0.0203
66306	Fam53c	5.92	0.00474
78248	Armcx1	5.92	0.00423
67020	Tmem88	5.91	0.00613
106957	Slc39a6	5.91	0.0041
72415	Sgol1	5.91	0.0256
19055	Ppp3ca	5.91	0.00505
229877	Rap1gds1	5.9	0.00413
276770	Eif5a	5.9	0.00834
11568	Aebp1	5.9	0.0138
20317	Serpinf1	5.89	0.013
74480	Samd4	5.89	0.0129
14726	Pdpn	5.89	0.00581
216856	Nlgn2	5.89	0.0136
68668	Klk5	5.89	0.0102
77264	Zfp142	5.88	0.0159
24086	Tlk2	5.88	0.014
80289	Lysmd3	5.88	0.00467
14387	Gaa	5.88	0.0273
70083	Metrn	5.87	0.00853
66752	4933404O12Rik	5.87	0.016
22327	Vbp1	5.86	0.00865
29869	Ulk2	5.86	0.0218
78895	Pus7l	5.86	0.00434
72568	Lin9	5.86	0.00669
69666	Psmg4	5.85	0.00487
26921	Map4k4	5.85	0.00834
14758	Gpm6b	5.85	0.00754
225288	Fhod3	5.85	0.00434
66556	Drap1	5.85	0.0115
13204	Dhx15	5.85	0.00526
66197	Cks2	5.85	0.00466
55988	Snx12	5.84	0.00468
93708	Pcdhgc5	5.84	0.0106
16580	Kifc5b	5.84	0.0157
14118	Fbn1	5.84	0.0154
14399	Gabra6	5.83	0.0277
216188	Aldh1l2	5.83	0.0138
22256	Ung	5.82	0.0123
66409	Rsl1d1	5.82	0.00724
69263	Rfc3	5.82	0.00435
19124	Procr	5.82	0.00721
71919	Rpap3	5.81	0.0076
270906	Prr11	5.81	0.0265
232217	4933427D06Rik	5.81	0.00442
104027	Synpo	5.8	0.00618
210992	Lpcat1	5.8	0.0151
229841	Cenpe	5.8	0.0269
69953	2810025M15Rik	5.8	0.0241
14083	Ptk2	5.79	0.00469
12452	Ccng2	5.79	0.023
21789	Tfpi2	5.78	0.0132
68095	Ociad1	5.78	0.0255
66913	Kdelr2	5.78	0.0276
14000	Drosha	5.78	0.0196
56442	Serinc1	5.77	0.023
70235	Poc1a	5.77	0.0165
239337	Adamts12	5.77	0.00542
67151	Psmd9	5.76	0.028
101206	Tada3	5.75	0.0249
110033	Kif22	5.75	0.0281
67604	Get4	5.75	0.0255
216725	Adamts2	5.75	0.0265
109113	Uhrf2	5.74	0.0269
27979	Eif3b	5.74	0.0187
66934	Dsn1	5.73	0.0107
19731	Rgl1	5.72	0.0204
75292	Prkd3	5.72	0.0158
170762	Nup155	5.72	0.025
14229	Fkbp5	5.72	0.0137
100515	Zfp518b	5.71	0.0281
13852	Stx2	5.71	0.0275
100088	Rcc1	5.71	0.0105
15364	Hmga2	5.71	0.0058
74451	Pgs1	5.7	0.00605
381413	Gpr176	5.7	0.0192
228876	Zfp334	5.69	0.0253
19285	Ptrf	5.69	0.00628
23908	Hs2st1	5.69	0.026
217342	Ube2o	5.68	0.0114
22160	Twist1	5.68	0.00475
100038575	Gm10635	5.68	0.0165
76156	Fam131b	5.68	0.013
208194	Exog	5.68	0.00856
20438	Siah1b	5.67	0.0172
76438	Rftn1	5.67	0.00499
70218	Kif18b	5.66	0.0285
319974	Auts2	5.66	0.0282
22441	Xlr	5.65	0.00489
12558	Cdh2	5.65	0.012
320534	Tmem104	5.64	0.00537
100561	Slc15a4	5.63	0.00501
109079	Sephs1	5.63	0.0202
223701	Mkl1	5.63	0.0168
380959	Alg10b	5.63	0.00571
72650	2810006K23Rik	5.63	0.0106
21853	Timeless	5.62	0.0098
268396	Sh3pxd2b	5.62	0.00579
56367	Scoc	5.62	0.00799
19876	Robo1	5.62	0.0274
320975	D330050G23Rik	5.62	0.0296
70797	Ankib1	5.62	0.0224
76131	Depdc1a	5.61	0.0223
19159	Cyth3	5.61	0.0298
20818	Srprb	5.6	0.0223
210297	Lrch2	5.6	0.00644
56692	Lamtor3	5.6	0.00831
68099	Fam92a	5.6	0.00774
22750	Zfp9	5.59	0.0113
235036	Ppan	5.59	0.0137
66059	Krtcap2	5.59	0.0112
72050	Kdelc1	5.59	0.0266
13361	Dhfr	5.59	0.00943
68119	Cmtm3	5.59	0.00525
192176	Flna	5.58	0.019
68545	Ecscr	5.58	0.00508
233115	Dpy19l3	5.58	0.00528
65111	Dap3	5.58	0.0171
12954	Cryaa	5.58	0.0147
319581	Xkr5	5.57	0.0051
67843	Slc35a4	5.57	0.00512
68016	Murc	5.57	0.0156
53895	Clpp	5.57	0.00511
12189	Brca1	5.57	0.0306
73526	Speer4b	5.56	0.025
20540	Slc7a7	5.56	0.00554
71973	Rbpms2	5.56	0.00651
67037	Pmf1	5.56	0.0207
67139	Mis12	5.56	0.00609
69706	Lrr1	5.55	0.0198
21681	Alyref	5.55	0.00674
67574	Alg13	5.55	0.0181
20842	Stag1	5.54	0.0221
72391	Cdkn3	5.54	0.00561
224171	C330027C09Rik	5.54	0.0276
26879	B3galnt1	5.54	0.0154
67979	Atad1	5.54	0.0167
11853	Rhoc	5.53	0.00614
331474	Rgag4	5.53	0.00626
19111	Prl6a1	5.53	0.00603
109042	Prkcdbp	5.53	0.015
18709	Pik3r2	5.53	0.00649
15519	Hsp90aa1	5.53	0.0169
319983	9330111N05Rik	5.53	0.00644
72016	1600002H07Rik	5.53	0.0113
72462	Rrp1b	5.52	0.0175
83703	Dbr1	5.52	0.0067
76457	Ccdc134	5.52	0.00598
78619	Zfp449	5.51	0.011
78697	Pus7	5.51	0.0101
17216	Mcm2	5.51	0.0312
12235	Bub1	5.51	0.0313
30058	Timm8a1	5.5	0.00544
20135	Rrm2	5.5	0.00537
56213	Htra1	5.5	0.0239
12843	Col1a2	5.5	0.0125
74277	Chic2	5.5	0.00542
240913	Adamts4	5.5	0.0203
71323	Rassf8	5.49	0.0216
17344	Pias2	5.49	0.0197
235106	Ntm	5.49	0.00597
16885	Limk1	5.49	0.0315
22151	Tubb2a	5.48	0.00555
56516	Rbms2	5.48	0.025
19277	Ptpro	5.48	0.021
68046	2700062C07Rik	5.48	0.00741
18008	Nes	5.47	0.00602
68080	Gpn3	5.47	0.014
12934	Dpysl2	5.47	0.00552
12293	Cacna2d1	5.47	0.0226
20454	St3gal5	5.46	0.0115
19822	Rnf4	5.46	0.0058
231123	Haus3	5.46	0.0262
14910	Gt(ROSA)26Sor	5.46	0.00752
12833	Col6a1	5.46	0.00585
67959	Puf60	5.45	0.0298
16498	Kcnab2	5.45	0.026
12018	Bak1	5.45	0.00729
104457	0610010K14Rik	5.45	0.00558
21838	Thy1	5.44	0.0279
225895	Taf6l	5.44	0.00986
109108	Slc30a9	5.44	0.0314
18747	Prkaca	5.44	0.0265
56488	Nxt1	5.44	0.0261
14588	Gfra4	5.44	0.0074
26909	Exo1	5.44	0.0282
66455	Cnpy4	5.44	0.0301
59035	Carm1	5.44	0.0265
68644	Abhd14a	5.44	0.0061
19182	Psmc3	5.43	0.0245
14130	Fcgr2b	5.43	0.00586
270190	Ephb1	5.43	0.0056
245474	Dkc1	5.43	0.0186
381546	Ccdc24	5.43	0.0201
26434	Prnd	5.42	0.032
12876	Cpe	5.42	0.00709
70247	Psmd1	5.41	0.0131
77782	Polq	5.41	0.0227
67199	Pfdn1	5.41	0.0296
18074	Nid2	5.41	0.0137
70771	Gpr173	5.41	0.00953
239554	Foxred2	5.41	0.0324
22384	Eif4h	5.41	0.0102
72899	Macrod2	5.4	0.0231
72107	Dscc1	5.4	0.00886
13040	Ctss	5.4	0.022
56456	Actl6a	5.4	0.00756
382793	Mtx3	5.39	0.00705
83554	Fstl3	5.39	0.00706
99889	Arfip1	5.39	0.00698
19345	Rab5c	5.38	0.0109
353211	Prune2	5.38	0.0326
52120	Hgsnat	5.38	0.0122
231452	Sdad1	5.37	0.0103
83454	Nxf2	5.37	0.0293
240641	Kif20b	5.37	0.0118
13543	Dvl2	5.37	0.00587
545260	Arsi	5.37	0.0182
320938	Tnpo3	5.36	0.0101
100213	Rusc2	5.36	0.00927
74370	Rptor	5.36	0.0222
23879	Fxr2	5.36	0.028
245865	Spag4	5.35	0.0117
66725	Lrrk2	5.35	0.0158
12262	C1qc	5.35	0.0147
381306	BC055324	5.35	0.017
68512	Tomm5	5.34	0.0217
239393	Lrp12	5.34	0.0174
67628	Anp32b	5.34	0.0294
74760	Rab3il1	5.33	0.0214
72542	Pgam5	5.33	0.0228
258634	Olfr1164	5.33	0.0123
19114	Prl7a2	5.32	0.0114
18679	Phka1	5.32	0.0231
74111	Rbm19	5.31	0.0295
14609	Gja1	5.31	0.0109
14402	Gabrb3	5.31	0.019
72322	Xpo5	5.3	0.00614
76205	Stard3nl	5.3	0.0216
12236	Bub1b	5.3	0.0253
20624	Eftud2	5.29	0.0291
17064	Cd93	5.29	0.0295
56495	Asna1	5.29	0.0211
73656	Ms4a6c	5.28	0.00676
16493	Kcna5	5.28	0.0128
14534	Kat2a	5.28	0.013
67068	Dynlrb1	5.28	0.00632
72515	Wdr43	5.27	0.00713
68792	Srpx2	5.27	0.0325
19122	Prnp	5.27	0.00695
14733	Gpc1	5.27	0.0148
14673	Gna12	5.27	0.0154
13401	Dmwd	5.27	0.0313
237911	Brip1	5.27	0.0328
11785	Apbb1	5.27	0.0163
27405	Abcg3	5.27	0.00655
16323	Inhba	5.26	0.00873
52064	Coq5	5.26	0.0266
381979	Brsk1	5.26	0.0179
11783	Apaf1	5.26	0.00629
58184	Rqcd1	5.24	0.0179
102747	Lrrc49	5.24	0.0291
224093	Fam43a	5.24	0.026
12978	Csf1r	5.24	0.0138
107995	Cdc20	5.24	0.0332
17222	Anapc1	5.24	0.00635
27407	Abcf2	5.24	0.0201
73212	3110082I17Rik	5.24	0.0106
65960	Twsg1	5.23	0.0112
19687	Rfc1	5.23	0.0335
18973	Pole	5.23	0.0281
223604	Kcnk9	5.23	0.0116
68014	Zwilch	5.22	0.0302
270163	Myo9a	5.22	0.0105
28036	Larp7	5.22	0.0321
16194	Il6ra	5.22	0.00696
104721	Ddx1	5.22	0.0169
58234	Shank3	5.21	0.0117
17865	Mybl2	5.21	0.0175
12313	Calm1	5.21	0.0171
75084	4930511M06Rik	5.21	0.0339
73827	Tmem198b	5.2	0.0278
18749	Prkacb	5.2	0.0303
56405	Dusp14	5.2	0.0103
110253	Triobp	5.19	0.0278
16785	Rpsa	5.19	0.0131
53414	Bysl	5.19	0.00791
110094	Phka2	5.18	0.0139
26754	Cops5	5.18	0.0109
108058	Camk2d	5.18	0.0244
21927	Tnfaip1	5.17	0.00667
69982	Spink2	5.17	0.0284
20133	Rrm1	5.17	0.0175
69617	Pitrm1	5.17	0.032
269582	Clspn	5.17	0.0252
381066	Zfp948	5.16	0.00713
72508	Rps6kb1	5.16	0.00979
106073	Mfsd5	5.16	0.03
68612	Ube2c	5.15	0.0334
20678	Sox5	5.15	0.0106
105787	Prkaa1	5.15	0.0305
54216	Pcdh7	5.15	0.0149
229524	Msto1	5.15	0.0123
66421	2410004B18Rik	5.15	0.0184
665976	Vmn2r-ps129	5.14	0.0296
66637	Tsen15	5.14	0.00861
74194	Rnd3	5.14	0.0243
319455	Pld5	5.14	0.0118
72201	Otud6b	5.14	0.0289
108899	2700081O15Rik	5.14	0.0285
320709	Tmem117	5.13	0.0175
319653	Slc25a40	5.13	0.00745
94279	Sfxn2	5.13	0.00756
13433	Dnmt1	5.13	0.0285
12834	Col6a2	5.13	0.00715
233060	Zfp382	5.12	0.017
69956	Ptcd3	5.12	0.00828
67220	Plekho1	5.12	0.0156
259016	Olfr1048	5.12	0.0103
97112	Nmd3	5.12	0.00718
94353	Hmgn3	5.12	0.0115
216766	Gemin5	5.12	0.0281
68498	Tspan11	5.11	0.0164
11837	Rplp0	5.11	0.0219
258683	Olfr262	5.11	0.0315
226123	Morn4	5.11	0.00692
17308	Mgat1	5.11	0.0269
67553	Gstcd	5.11	0.0175
13179	Dcn	5.11	0.00788
99480	Dnttip2	5.1	0.0204
12449	Ccnf	5.1	0.025
69499	Tsr2	5.09	0.0243
21767	Tex264	5.09	0.0351
11489	Adam12	5.09	0.01
103733	Tubg1	5.08	0.0302
19240	Tmsb10	5.08	0.0071
74094	Tjap1	5.08	0.0353
20333	Sec22b	5.08	0.029
19921	Rpl19	5.08	0.0275
18140	Uhrf1	5.07	0.0135
109232	Sccpdh	5.07	0.0302
108689	Obfc1	5.07	0.0367
230162	Zfp189	5.06	0.0242
67437	Ssr3	5.06	0.0238
67826	Snap47	5.06	0.00856
69215	Sat2	5.06	0.00779
94227	Pi15	5.06	0.015
107503	Atf5	5.06	0.0219
16430	Stt3a	5.05	0.00833
67264	Ndufb8	5.05	0.0196
68968	Cdan1	5.05	0.00726
12468	Cct7	5.05	0.0108
52639	Wipi1	5.04	0.027
74617	Scpep1	5.04	0.024
17827	Mtx1	5.04	0.00736
30948	Bin1	5.04	0.0346
332397	Nanos1	5.03	0.0121
140579	Elmo2	5.03	0.0366
240590	Dmrt3	5.03	0.0339
52715	Ccdc43	5.03	0.00919
54519	Apbb1ip	5.03	0.0222
68969	Eif1b	5.02	0.0155
71085	Arhgap19	5.02	0.0137
246696	Slc25a28	5.01	0.0239
17975	Ncl	5.01	0.0159
98238	Lrrc59	5.01	0.00943
170823	Glmn	5.01	0.00783
72691	Calhm2	5.01	0.0202
66988	Lap3	5	0.0092
29870	Gtse1	5	0.0194
237211	Fancb	5	0.00838
52592	Brms1l	5	0.0321
329003	Zfp516	4.99	0.00758
20498	Slc12a4	4.99	0.0246
18811	Prl2c2	4.99	0.00885
223828	Pphln1	4.99	0.0298
18858	Pmp22	4.99	0.0375
68770	Phtf2	4.99	0.0188
215387	Ncaph	4.99	0.026
13006	Smc3	4.98	0.0105
106298	Rrn3	4.98	0.0326
227743	Mapkap1	4.98	0.0166
70472	Atad2	4.98	0.0269
14211	Smc2	4.97	0.0182
69938	Scrn1	4.97	0.0355
93723	Pcdhga11	4.97	0.0116
17967	Ncam1	4.97	0.0081
17082	Il1rl1	4.97	0.028
208836	Fanci	4.97	0.0251
22209	Ube2a	4.96	0.0136
329384	Ptrh1	4.96	0.00928
546336	Prrg1	4.96	0.0321
83964	Jam3	4.96	0.0163
100039239	Gm2115	4.96	0.00799
232187	Smyd5	4.95	0.0275
26961	Rpl8	4.95	0.00905
69745	Pold4	4.95	0.011
68172	Rpl39l	4.94	0.0287
74268	Aven	4.94	0.00791
319944	Taf2	4.93	0.0086
18639	Pfkfb1	4.93	0.0164
20778	Scarb1	4.92	0.012
224023	Klhl22	4.92	0.00885
11432	Acp2	4.92	0.0178
74666	4930432K21Rik	4.92	0.00797
19361	Rad51	4.91	0.0235
67429	Nudcd1	4.91	0.008
18005	Nek2	4.91	0.0384
11769	Ap1s1	4.91	0.0365
69051	Pycr2	4.9	0.0168
21770	Ppp2r5d	4.9	0.0384
77116	Mtmr2	4.9	0.0123
72925	2016-03-01	4.9	0.00936
107373	Fam111a	4.9	0.0263
12825	Col3a1	4.9	0.00808
12585	Cdr2	4.9	0.0106
75695	Rilpl1	4.89	0.0328
72065	Rap2c	4.89	0.0183
69232	Qrich1	4.89	0.00819
244550	Podnl1	4.89	0.0262
217365	Nploc4	4.89	0.0231
52530	Nhp2	4.89	0.0296
373864	Col27a1	4.89	0.0326
22137	Ttk	4.87	0.0371
114679	Selm	4.87	0.0133
331392	Gm5124	4.87	0.0354
14043	Ext2	4.87	0.0368
108147	Atic	4.87	0.0248
20509	Slc19a1	4.86	0.0141
66998	Psmd5	4.86	0.0156
19183	Psmc3ip	4.86	0.0179
433520	Gm14403	4.86	0.00935
338365	Slc41a2	4.85	0.0276
15161	Hcfc1	4.85	0.0232
66664	Tmem41a	4.84	0.0399
14824	Grn	4.84	0.0263
30055	Timm13	4.83	0.0118
20405	Sh3gl1	4.83	0.0289
104831	Ptpn23	4.83	0.016
105298	Epdr1	4.83	0.0145
73149	Clec4a3	4.83	0.0194
54411	Atp6ap1	4.83	0.0155
67618	Aasdhppt	4.83	0.0403
72190	2510009E07Rik	4.83	0.0289
224938	Pja2	4.82	0.0159
435965	Lrp3	4.82	0.0241
15201	Hells	4.82	0.0261
23834	Cdc6	4.82	0.0191
320586	A630089N07Rik	4.82	0.00869
69221	2410006H16Rik	4.82	0.00894
19933	Rpl21	4.81	0.00861
226169	Pprc1	4.81	0.0143
17330	Minpp1	4.81	0.015
67839	Gpsm1	4.81	0.0167
14225	Fkbp1a	4.81	0.0284
328329	Mast4	4.8	0.00866
16563	Kif2a	4.8	0.0123
66989	Kctd20	4.8	0.0117
66596	Gtf3a	4.8	0.0236
98376	Gorab	4.8	0.0295
12288	Cacna1c	4.8	0.0207
75329	Atf7ip2	4.8	0.0193
269209	Stk36	4.79	0.00983
18451	P4ha1	4.79	0.022
16956	Lpl	4.79	0.0202
15499	Hsf1	4.79	0.0224
73467	1700066M21Rik	4.79	0.0181
258543	Olfr810	4.78	0.0192
52653	Nudcd2	4.78	0.037
78651	Lsm6	4.78	0.0107
12144	Blm	4.78	0.0343
22022	Tpst2	4.77	0.0362
19172	Psmb4	4.77	0.0329
101612	Grwd1	4.77	0.0124
99326	Garnl3	4.77	0.0376
78920	Dlst	4.77	0.0127
22793	Zyx	4.76	0.0165
72141	Adpgk	4.76	0.0306
238328	Vash1	4.75	0.0235
20392	Sgce	4.75	0.0407
73173	Pcdh18	4.75	0.0216
18181	Nrf1	4.75	0.0103
66223	Mrpl35	4.75	0.0216
170439	Elovl6	4.75	0.0315
68184	Denr	4.75	0.0267
231430	Cox18	4.75	0.0386
22213	Ube2g2	4.74	0.0361
66256	Ssr2	4.74	0.0409
67116	Cuedc2	4.74	0.0146
58250	Chst11	4.74	0.0247
246782	Atpaf2	4.74	0.0287
109575	Tbx10	4.73	0.011
107815	Scml2	4.73	0.0131
14594	Ggta1	4.73	0.0332
14254	Flt1	4.73	0.0142
66899	Fip1l1	4.73	0.0221
12289	Cacna1d	4.73	0.0325
100503572	Bbip1	4.73	0.00919
21453	Tcof1	4.72	0.0399
19184	Psmc5	4.72	0.0143
67242	Gemin6	4.72	0.0333
268970	Arhgap28	4.72	0.0253
66357	Ostc	4.71	0.0294
27357	Gyg	4.71	0.0416
74203	Eif4enif1	4.71	0.00928
54709	Eif3i	4.71	0.00984
76686	Clip3	4.71	0.0223
11694	Alx3	4.71	0.0337
11690	Alox5ap	4.71	0.00938
268390	Ahsa2	4.71	0.00935
14376	Ganab	4.7	0.0271
211651	Fancd2	4.7	0.0418
70383	Cox10	4.7	0.00942
192651	Zfp286	4.69	0.0102
72736	Tmx1	4.69	0.0224
77053	Sun1	4.69	0.0281
83673	Snhg1	4.69	0.0165
50524	Sall2	4.69	0.0201
70361	Lman1	4.69	0.033
381293	Kif14	4.69	0.0381
213673	9530068E07Rik	4.69	0.0201
67048	Vma21	4.68	0.0318
53890	Sart3	4.68	0.0219
66734	Map1lc3a	4.68	0.0253
72179	Fbxl2	4.68	0.00951
76594	Dnajc18	4.68	0.0199
66054	Cndp2	4.68	0.0112
27366	Txnl4a	4.67	0.0366
17346	Mknk1	4.67	0.0134
100952	Emilin1	4.67	0.0247
68875	Tmcc2	4.66	0.0202
19700	Rem1	4.66	0.0276
94061	Mrpl1	4.66	0.023
210535	Gm12169	4.66	0.023
328186	Gm10336	4.66	0.0216
14634	Gli3	4.66	0.0295
69627	Fam89a	4.66	0.0413
215210	Tmem120a	4.65	0.0283
66161	Pop4	4.65	0.0345
14783	Grb10	4.65	0.036
14231	Fkbp7	4.65	0.0335
72831	Dhx30	4.65	0.0216
59028	Rcl1	4.64	0.0276
57441	Gmnn	4.64	0.0271
216527	Ccm2	4.64	0.0107
59008	Anapc5	4.64	0.0379
20419	Shcbp1	4.63	0.0422
76816	Sdccag8	4.63	0.0254
98733	Obsl1	4.63	0.0325
12774	Ccr5	4.63	0.0164
20878	Aurka	4.63	0.0434
104111	Adcy3	4.63	0.021
76630	Stambpl1	4.62	0.0265
53601	Pcdh12	4.62	0.0422
71207	Nudt4	4.62	0.03
223499	Dcaf13	4.62	0.0101
26926	Aifm1	4.62	0.0157
21982	Tmem165	4.61	0.0423
19175	Psmb6	4.61	0.033
18472	Pafah1b1	4.61	0.0417
68611	Mrpl28	4.61	0.0406
17158	Man2a1	4.61	0.0103
16551	Kif11	4.61	0.0382
68606	Ppm1f	4.6	0.0409
100502766	Kifc1	4.6	0.0425
232174	Cyp26b1	4.6	0.0129
269941	Chsy1	4.6	0.019
448850	Znhit3	4.59	0.0353
239364	Tspyl5	4.59	0.0111
225743	Rnf165	4.59	0.044
109054	Pfdn4	4.59	0.0347
76568	Ift46	4.59	0.0411
69270	Gins1	4.59	0.0383
13205	Ddx3x	4.59	0.0211
75784	1700007G11Rik	4.59	0.0103
26554	Cul3	4.58	0.0347
11548	Adra1b	4.58	0.0122
77305	Wdr82	4.57	0.0111
20638	Snrpb	4.57	0.015
212986	Scfd2	4.57	0.0202
16597	Klf12	4.57	0.0151
231912	Katnal1	4.57	0.0312
72630	Hspa12b	4.57	0.0106
19347	Dennd5a	4.57	0.0111
100503727	1700011B04Rik	4.57	0.0104
30853	Mlf2	4.56	0.0361
56321	Aatf	4.56	0.0268
21426	Tfec	4.55	0.017
19089	Prkcsh	4.55	0.0226
69774	Ms4a6b	4.55	0.0119
27398	Mrpl2	4.55	0.0153
100041347	Gm11985	4.55	0.0245
78070	Cpt1c	4.55	0.0319
70661	Sik3	4.54	0.0121
258985	Olfr1256	4.54	0.0298
17279	Melk	4.54	0.0363
270152	Amica1	4.54	0.0224
18744	Pja1	4.53	0.0169
66258	Mrps17	4.52	0.0366
217653	Mis18bp1	4.52	0.0321
218581	Depdc1b	4.52	0.0347
70799	Cep192	4.52	0.0433
68170	B230118H07Rik	4.52	0.0283
104759	Pld4	4.51	0.0391
74091	Npl	4.51	0.0108
11496	Adam22	4.51	0.0201
56496	Tspan6	4.5	0.0329
56459	Sae1	4.5	0.021
68585	Rtn4	4.5	0.0247
67236	Cinp	4.5	0.011
57810	Cdon	4.5	0.0237
66442	Spc25	4.49	0.0302
12353	Car6	4.49	0.0341
68774	Ms4a6d	4.48	0.0239
225896	Ubxn1	4.47	0.0223
52398	2016-09-11	4.47	0.0305
70024	Mcm10	4.47	0.0389
15108	Hsd17b10	4.47	0.0164
216963	Git1	4.47	0.0166
14283	Fosl1	4.47	0.0138
12593	Cdyl	4.47	0.025
231872	Aimp2	4.47	0.0409
14375	Xrcc6	4.46	0.0121
67781	Ilf2	4.46	0.0344
66205	Cd302	4.46	0.026
64010	Sav1	4.45	0.0118
64291	Osbpl1a	4.45	0.0398
258959	Olfr170	4.45	0.0193
211147	2016-03-11	4.45	0.0337
67678	Lsm3	4.45	0.0253
68794	Flnc	4.45	0.0136
20833	Ssrp1	4.44	0.0373
76378	Ropn1	4.44	0.0284
269695	Rnft2	4.44	0.023
19280	Ptprs	4.44	0.025
228829	Phf20	4.44	0.036
17995	Ndufv1	4.44	0.0216
69367	Glrx2	4.44	0.0281
23857	Dmtf1	4.44	0.0298
26888	Clec4a2	4.44	0.0435
70123	2210013O21Rik	4.44	0.0326
69987	1700026L06Rik	4.44	0.0114
380705	Tmem102	4.43	0.0124
20719	Serpinb6a	4.43	0.026
171285	Havcr2	4.43	0.0181
621381	Gm6222	4.43	0.0197
18301	Fxyd5	4.43	0.0259
14241	Foxl1	4.43	0.0246
11747	Anxa5	4.43	0.019
216821	Tmem11	4.42	0.036
13877	Erh	4.42	0.0271
54138	Atxn10	4.42	0.016
71285	4933430H16Rik	4.42	0.0189
268470	Ube2z	4.41	0.0148
69737	Ttl	4.41	0.0211
11545	Parp1	4.41	0.0269
76429	Lhpp	4.41	0.0224
66679	Rae1	4.4	0.0126
76477	Pcolce2	4.4	0.0216
67268	Myl12a	4.4	0.0209
11666	Abcd1	4.4	0.0409
74104	Abcb6	4.4	0.0407
20583	Snai2	4.39	0.0469
114644	Slc13a3	4.39	0.0171
74762	Mdga1	4.39	0.0397
68303	Fam114a1	4.39	0.0316
320209	Ddx11	4.39	0.0121
269400	Rtel1	4.38	0.0215
228770	Rspo4	4.38	0.0189
241989	Pabpc4l	4.38	0.0173
212679	Mars2	4.38	0.0123
51788	H2afz	4.38	0.0182
209354	Eif2b1	4.38	0.0258
319504	Nrcam	4.37	0.0364
15964	Ifna11	4.37	0.0329
621893	Hist2h2ab	4.37	0.012
20163	Rsu1	4.36	0.042
56361	Pus1	4.36	0.035
101185	Pot1a	4.36	0.0194
11520	Plin2	4.36	0.0433
194908	Pld6	4.36	0.0306
64704	Htra2	4.36	0.0324
666184	Gm15080	4.36	0.0189
100042761	Gm10697	4.36	0.0338
235661	Dync1li1	4.36	0.0121
233781	Xylt1	4.35	0.0387
21803	Tgfb1	4.35	0.0202
68981	Snrpa1	4.35	0.0223
19275	Ptprn	4.35	0.0128
19084	Prkar1a	4.35	0.0136
100042480	Nhsl2	4.35	0.0129
216760	Mfap3	4.35	0.029
68837	Foxk2	4.35	0.038
93685	Entpd7	4.35	0.0294
77980	Sbf1	4.34	0.0123
20018	Polr1d	4.34	0.015
212377	Mms22l	4.34	0.0463
433171	Gm10549	4.34	0.0336
402734	C730036E19Rik	4.34	0.0324
170740	Zfp287	4.33	0.0176
20271	Scn5a	4.33	0.0446
59040	Rhot1	4.33	0.0415
19139	Prps1	4.33	0.0276
70645	Oip5	4.33	0.0462
109241	Mbd5	4.33	0.0129
192173	Fam195b	4.33	0.0391
11486	Ada	4.33	0.0232
11431	Acp1	4.33	0.0144
66950	Tmem206	4.32	0.0355
20641	Snrpd1	4.32	0.0381
16647	Kpna2	4.32	0.0205
76813	Armc6	4.32	0.0167
109674	Ampd2	4.32	0.0258
259021	Olfr1054	4.31	0.029
66999	Med28	4.31	0.0474
474332	Dnm3os	4.31	0.0181
52563	Cdc23	4.31	0.0373
101867	Rrp8	4.3	0.0141
52898	Rnasek	4.3	0.0409
228421	Kif18a	4.3	0.0389
67136	Kbtbd4	4.3	0.0338
104806	Fancm	4.3	0.0455
69784	1500009L16Rik	4.3	0.0139
67988	Tmx3	4.29	0.0136
70466	Ckap2l	4.29	0.0458
80986	Ckap2	4.29	0.0409
69659	2310069G16Rik	4.29	0.0256
26443	Psma6	4.28	0.0398
103806	Maml1	4.28	0.0137
16010	Igfbp4	4.28	0.0185
207704	Gtpbp10	4.28	0.0129
71355	Col24a1	4.28	0.0172
12442	Ccnb2	4.28	0.0471
75659	Wdr54	4.27	0.0387
56284	Mrpl19	4.27	0.0161
387211	Mir215	4.27	0.0183
71835	Lancl2	4.27	0.0267
68090	Yif1a	4.26	0.0428
71027	Tmem30c	4.26	0.0393
71853	Pdia6	4.26	0.0182
103850	Nt5m	4.26	0.0131
12580	Cdkn2c	4.26	0.0457
67187	Zmynd19	4.25	0.0335
66997	Psmd12	4.25	0.0177
18972	Pold2	4.25	0.0441
18642	Pfkm	4.25	0.0135
55989	Nop58	4.25	0.0196
114601	Ehbp1l1	4.25	0.048
66456	2810001G20Rik	4.25	0.0204
264134	Ttc26	4.24	0.0418
71817	Tmem50a	4.24	0.0136
20612	Siglec1	4.24	0.0481
18186	Nrp1	4.24	0.0388
100009664	F630206G17Rik	4.24	0.0302
216565	Ehbp1	4.24	0.0133
64707	Suv39h2	4.23	0.0269
16923	Sh2b3	4.23	0.0457
69162	Sec31a	4.23	0.0451
209540	Rgag1	4.23	0.022
258887	Olfr1294	4.23	0.0162
218506	Mrps27	4.23	0.014
64660	Mrps24	4.23	0.0418
667705	Gm8773	4.23	0.0184
28030	Gfm1	4.23	0.0144
83675	Bicc1	4.23	0.0167
71086	4933412E12Rik	4.23	0.0255
72338	Wdr89	4.22	0.0167
226182	Taf5	4.22	0.0149
54673	Sh3glb1	4.22	0.0399
209003	Rbmx2	4.22	0.0423
19248	Ptpn12	4.22	0.0256
14815	Nr3c1	4.22	0.0217
56743	Lat2	4.22	0.0134
59083	Fetub	4.22	0.0227
330323	Fam188b	4.22	0.0141
434377	Zfp560	4.21	0.0416
386612	Thoc6	4.21	0.0334
234515	Inpp4b	4.21	0.0178
14009	Etv1	4.21	0.0382
207785	Csrnp2	4.21	0.0498
71846	Syce2	4.2	0.0232
72599	Pdia5	4.2	0.0417
258866	Olfr1008	4.2	0.049
56032	Nprl2	4.2	0.0374
68375	Ndufa8	4.2	0.0487
14958	H1f0	4.2	0.0338
14056	Ezh2	4.2	0.0272
21915	Dtymk	4.2	0.0464
13032	Ctsc	4.2	0.0152
12301	Cacybp	4.2	0.0163
22385	Baz1b	4.2	0.0319
21894	Tln1	4.19	0.0138
67149	Nkain1	4.19	0.0338
67154	Mtdh	4.19	0.017
67144	Lrrc40	4.19	0.0241
75758	9130401M01Rik	4.19	0.0247
230721	Pabpc4	4.18	0.0315
244654	Mtss1l	4.18	0.0192
15115	Hars	4.18	0.0219
100042948	Gm15760	4.18	0.0145
105387	Akr1c14	4.18	0.0171
70356	St13	4.17	0.0279
56289	Rassf1	4.17	0.0214
226412	R3hdm1	4.17	0.0399
17199	Mc1r	4.17	0.0152
100604	Lrrc8c	4.17	0.0338
27281	Hrasls	4.17	0.0141
208440	Dip2c	4.17	0.028
70248	Dazap1	4.17	0.0273
12153	Bmp1	4.17	0.0261
67469	Abhd5	4.17	0.0283
231380	Uba6	4.16	0.044
19385	Ranbp1	4.16	0.0296
68501	Nsmce2	4.16	0.0321
17395	Mmp9	4.16	0.0378
59024	Med12	4.16	0.0204
100129	Gpr153	4.16	0.019
108101	Fermt3	4.16	0.0208
67832	Brix1	4.16	0.0141
21357	Tarbp2	4.15	0.0277
12514	Cd68	4.15	0.0152
237979	Sdk2	4.14	0.0471
665563	Mthfd2l	4.14	0.0144
57750	Wdr12	4.13	0.0401
11848	Rhoa	4.13	0.0413
67036	Mrpl45	4.13	0.0273
14371	Fzd9	4.13	0.0218
13874	Ereg	4.13	0.041
236848	BC023829	4.13	0.0255
11787	Apbb2	4.13	0.0152
56224	Tspan5	4.12	0.0288
108089	Rnf144a	4.12	0.0288
66566	Ntpcr	4.12	0.0187
110920	Hspa13	4.12	0.044
83767	Wasf1	4.11	0.0316
77891	Ube2s	4.11	0.0493
22200	Uba3	4.11	0.0434
209478	Tbc1d12	4.11	0.0194
72195	Supt7l	4.11	0.0399
229512	Smg5	4.11	0.0352
98710	Rabif	4.11	0.0163
18701	Pigf	4.11	0.0152
66441	Magohb	4.11	0.0413
17001	Ltc4s	4.11	0.0157
108900	Fam72a	4.11	0.02
68588	Cthrc1	4.11	0.0232
381286	Serpinb3c	4.1	0.015
68708	Rabl2	4.1	0.0427
72199	Mms19	4.1	0.0159
76890	Memo1	4.1	0.0158
14745	Lpar1	4.1	0.0159
15117	Has2	4.1	0.0476
100073351	Yy2	4.09	0.015
22418	Wnt5a	4.09	0.0408
229644	Trim45	4.09	0.036
20364	Sepw1	4.09	0.0155
26564	Ror2	4.09	0.0266
229504	Isg20l2	4.09	0.0491
277668	Gm13088	4.09	0.015
235180	Fez1	4.09	0.0471
73225	Fam118a	4.09	0.0209
26940	Ecsit	4.09	0.018
13001	Csnk2b	4.09	0.0175
11821	Aprt	4.09	0.0404
56622	Adam21	4.09	0.0158
68808	1110046J04Rik	4.09	0.0206
102595	Plekho2	4.08	0.0473
67889	Rbm18	4.07	0.0244
59029	Psmd14	4.07	0.0345
66230	Mrps28	4.07	0.0423
68675	Fam172a	4.07	0.0177
70465	Wdr77	4.05	0.0332
57815	Spata5	4.05	0.0484
60411	Cenpk	4.05	0.0321
606736	C920009B18Rik	4.05	0.028
27226	Pla2g7	4.04	0.0396
93724	Pcdhga12	4.04	0.0249
227699	Nup188	4.04	0.0165
108176	Npm3-ps1	4.04	0.0223
14747	Cmklr1	4.04	0.0207
21814	Tgfbr3	4.03	0.0171
20621	Snn	4.03	0.0315
100608	Noc4l	4.03	0.0337
66868	Mfsd1	4.03	0.03
105440	Kctd9	4.03	0.0214
14573	Gdnf	4.03	0.0488
218343	Ttc37	4.02	0.0168
69009	Thap7	4.02	0.0409
18673	Phb	4.02	0.0308
66590	Farsa	4.02	0.0402
13637	Efna2	4.02	0.0161
76863	Dcun1d5	4.02	0.0264
84113	Ptov1	4.01	0.0452
231713	Naa25	4.01	0.0388
59054	Mrps30	4.01	0.0255
387150	Mir132	4.01	0.0199
14360	Fyn	4.01	0.0359
67945	Rpl41	4	0.0432
27374	Prmt5	4	0.0256
17217	Mcm4	4	0.0265
16201	Ilf3	4	0.0421
328451	Gm5088	4	0.0493
399558	Flrt2	4	0.0445
100503199	5430416N02Rik	4	0.028
56532	Ripk3	3.99	0.0184
16948	Lox	3.99	0.0184
12175	Bnip2	3.99	0.047
20931	Surf2	3.98	0.0295
13026	Pcyt1a	3.98	0.0165
258264	Olfr747	3.98	0.02
77889	Lbh	3.98	0.0376
218952	Fermt2	3.98	0.0263
73379	Dcbld2	3.98	0.0389
12064	Bdnf	3.98	0.0371
54130	Actr1a	3.98	0.046
107242	AI837181	3.98	0.0484
20495	Slc12a1	3.97	0.0452
107701	Sf3b4	3.97	0.0467
56195	Ptbp2	3.97	0.0182
68431	Fbxl15	3.97	0.0313
224170	Dzip3	3.97	0.0165
60321	Wbp11	3.96	0.0272
52808	Tspyl2	3.96	0.0233
106344	Rfc4	3.96	0.0254
29858	Pmm1	3.96	0.0332
108098	Med21	3.96	0.0258
140559	Igsf8	3.96	0.0179
75320	Etnk1	3.96	0.0167
66464	Taf12	3.95	0.0263
56274	Stk3	3.95	0.0203
217431	Nol10	3.95	0.0194
14625	Gykl1	3.95	0.0206
100040854	Gm13040	3.95	0.0247
238130	Dock4	3.95	0.0338
69399	1700025G04Rik	3.95	0.0202
69895	Snhg8	3.94	0.0196
19296	Pvt1	3.94	0.0198
19220	Ptgfr	3.94	0.0345
26558	Homer3	3.94	0.0224
14359	Fxr1	3.94	0.0475
14297	Fxn	3.94	0.0417
380686	Cnrip1	3.94	0.0432
77832	Tchp	3.93	0.0338
101809	Spred3	3.93	0.0333
70099	Smc4	3.93	0.0296
17254	Slc3a2	3.93	0.018
19672	Rcn1	3.93	0.0253
15982	Ifrd1	3.93	0.0268
15361	Hmga1	3.93	0.0171
68214	Gsto2	3.93	0.021
68278	Ddx39	3.93	0.027
11491	Adam17	3.93	0.0345
245638	Tbc1d8b	3.92	0.0484
24061	Smc1a	3.92	0.0338
333789	N4bp2	3.92	0.0173
17765	Mtf2	3.92	0.024
26572	Cops3	3.92	0.0361
72747	Ttc39c	3.91	0.0396
69906	Slc25a32	3.91	0.0202
67223	Rrp15	3.91	0.0201
67239	Rpf2	3.91	0.0201
258321	Olfr809	3.91	0.0234
94063	Mrpl16	3.91	0.0465
16419	Itgb5	3.91	0.048
68259	Ift80	3.91	0.021
100041480	Gm9833	3.91	0.0381
216869	Arrb2	3.91	0.0282
19656	Rbmxl1	3.9	0.0283
18685	Phtf1	3.9	0.0338
77605	H2afv	3.9	0.0452
12167	Bmpr1b	3.9	0.0177
69684	Aarsd1	3.9	0.0351
75910	4930590L20Rik	3.9	0.0187
68449	Tbc1d10b	3.89	0.0234
18286	Odf2	3.89	0.0282
15382	Hnrnpa1	3.89	0.0346
20315	Cxcl12	3.89	0.0253
12649	Chek1	3.89	0.0195
99151	Cercam	3.89	0.0286
68763	1110038B12Rik	3.89	0.0187
22223	Uchl1	3.88	0.0275
116873	Stim2	3.88	0.0264
67332	Snrpd3	3.88	0.0389
72472	Slc16a10	3.88	0.047
69554	Klhdc2	3.88	0.0486
246256	Fcgr4	3.88	0.0205
67389	Fam132a	3.88	0.0347
66475	Rps23	3.87	0.0336
66506	Psmg3	3.87	0.0463
18081	Ninj1	3.87	0.0271
234258	Neil3	3.87	0.0489
83396	Glis2	3.87	0.0419
69860	Eif1ad	3.87	0.0285
66422	Dctpp1	3.87	0.048
71797	Chst13	3.87	0.0237
227210	Ccnyl1	3.87	0.0258
56444	Actr10	3.87	0.0241
114714	Rad51c	3.86	0.046
106572	Rab31	3.86	0.0214
224640	Lemd2	3.86	0.0183
15415	Hoxb7	3.86	0.0249
12156	Bmp2	3.86	0.0363
76937	2810429I04Rik	3.86	0.0181
30944	Zfp354c	3.85	0.0408
75870	Tcam1	3.85	0.0395
56305	Pitpnb	3.85	0.0406
68979	Nol11	3.85	0.0234
72007	Fndc3b	3.85	0.0207
14131	Fcgr3	3.85	0.0183
29861	Dpf1	3.85	0.0184
213895	Bms1	3.85	0.0208
208968	Zfp280c	3.84	0.0187
192216	Tmem47	3.84	0.0258
23984	Pde10a	3.84	0.0385
270685	Mthfd1l	3.84	0.0205
71268	Lrrfip2	3.84	0.0287
108655	Foxp1	3.84	0.0361
102545	Cmtm7	3.84	0.023
207175	Cetn4	3.84	0.0201
77609	Ccdc151	3.84	0.0303
234582	Ccdc102a	3.84	0.0408
18670	Abcb4	3.84	0.0197
235315	Rnf214	3.83	0.0347
12142	Prdm1	3.83	0.0229
18216	Ntsr1	3.83	0.0191
12490	Cd34	3.83	0.0349
329165	Abi2	3.83	0.049
22195	Ube2l3	3.82	0.0493
277973	Slc9a5	3.82	0.0377
74488	Lrrc15	3.82	0.0466
242050	Igsf10	3.82	0.0388
382233	Gm5166	3.82	0.0196
67181	Ctdnep1	3.82	0.0385
67355	1700109G14Rik	3.82	0.0234
66870	Serbp1	3.81	0.0191
67472	Mtfr1	3.81	0.022
225745	Haus1	3.81	0.0203
269336	Ccdc32	3.81	0.0219
74044	Ttf2	3.8	0.0386
22036	Traip	3.8	0.031
210029	Metrnl	3.8	0.02
16161	Il12rb1	3.8	0.0386
67933	Hcfc2	3.8	0.0444
13660	Ehd1	3.8	0.0287
72315	Ccdc74a	3.8	0.0194
77041	Arsk	3.8	0.0261
18393	Orc2	3.79	0.046
259068	Olfr1390	3.79	0.0268
106582	Nrm	3.79	0.0318
70144	Lrch3	3.79	0.0193
19400	Rapsn	3.77	0.0399
58521	Eid1	3.77	0.0404
72323	Asb6	3.77	0.0223
73674	Wdr75	3.76	0.0227
269470	Wdr3	3.76	0.0199
72828	Ubash3b	3.76	0.0312
67041	Oxct1	3.76	0.0322
17219	Mcm6	3.76	0.0499
16949	Loxl1	3.76	0.0243
330050	Fam185a	3.76	0.0216
11435	Chrna1	3.76	0.0478
76464	Casc5	3.76	0.0462
21923	Tnc	3.75	0.0296
108037	Shmt2	3.75	0.0306
19015	Ppard	3.75	0.0437
66942	Ddx18	3.75	0.0361
69773	1810026J23Rik	3.75	0.0296
216987	Utp6	3.74	0.0304
243548	Prickle2	3.74	0.0297
59001	Pole3	3.74	0.0234
12419	Cbx5	3.74	0.0463
22248	Unc119	3.73	0.0353
67760	Slc38a2	3.73	0.0203
230863	Sh2d5	3.73	0.0295
241950	Bbs12	3.73	0.0232
11876	Artn	3.73	0.0374
65105	Arl6ip4	3.73	0.0471
213827	Arcn1	3.73	0.0408
22401	Zmat3	3.72	0.0212
72055	Slc38a10	3.72	0.0256
56330	Pdcd5	3.72	0.0423
67169	Nradd	3.72	0.0314
107732	Mrpl10	3.72	0.0341
16526	Kcnk2	3.72	0.0259
67087	Ctnnbip1	3.72	0.0236
78586	Srbd1	3.71	0.0382
239743	Klhl6	3.71	0.0376
232987	B9d2	3.71	0.0366
545554	Ankrd34a	3.71	0.0495
229595	Adamtsl4	3.71	0.0245
226977	Actr1b	3.71	0.0478
99929	Tiparp	3.7	0.0317
19679	Pitpnm2	3.7	0.0346
66213	Med7	3.7	0.0431
20918	Eif1	3.7	0.0219
53317	Plrg1	3.69	0.0219
60345	Nrip2	3.69	0.0226
77065	Ints7	3.69	0.0404
66143	Eef1e1	3.69	0.0279
109676	Ank2	3.69	0.0211
54367	Zfp326	3.68	0.0247
76561	Snx7	3.68	0.0313
320951	Pisd	3.68	0.043
108888	Atad3a	3.68	0.022
66154	Tmem14c	3.67	0.0237
80732	Mynn	3.67	0.0216
408192	Gm9839	3.67	0.0242
237988	Cdr2l	3.67	0.0432
77593	Usp45	3.66	0.0331
26385	Grk6	3.66	0.0292
70231	Gorasp2	3.66	0.0347
625713	Gm15140	3.66	0.0353
76547	Tmem101	3.65	0.0308
74287	Kcmf1	3.65	0.0389
15289	Hmgb1	3.65	0.0221
329679	Fnip2	3.65	0.0349
231642	Alkbh2	3.65	0.0294
67263	Zswim6	3.64	0.0304
21399	Tcea1	3.64	0.0451
20429	Shox2	3.64	0.0219
76108	Rap2a	3.64	0.0315
56382	Rab9	3.64	0.0275
26432	Plod2	3.64	0.0339
258770	Olfr472	3.64	0.0469
64656	Mrps23	3.64	0.0496
14042	Ext1	3.64	0.0299
56320	Dbn1	3.64	0.0244
319684	5031425F14Rik	3.64	0.0267
22003	Tpm1	3.63	0.035
78239	Spint4	3.63	0.0352
18226	Nup62	3.63	0.0464
66257	Nicn1	3.63	0.0267
17876	Myef2	3.63	0.0462
382221	Gm1141	3.63	0.0229
280635	Emilin3	3.63	0.0389
246707	Emilin2	3.63	0.0223
[truncated: 2,388 more rows]
